# Supplementary material for: Identification of candidate genes controlling chilling tolerance of rice in the cold region at the booting stage by BSA-Seq and RNA-Seq
Source: R Soc Open Sci. 2020 Nov 18;7(11):201081. doi: 10.1098/rsos.201081 (PMC7735347; doi:10.1098/rsos.201081)
Supplement: Table S2 [file rsos201081supp2.xlsx]

## Sheet: Sheet1
Table S2 Construction of bulk pools based on high seed setting rate (SSR) marked per plant
Plant ID	Seed setting rate per plant marked (L-pool)	Plant ID	Seed setting rate per plant marked (H-pool)
69	14.63%	4	90.30%
94	19.32%	118	90.43%
89	25.32%	233	90.49%
28	43.77%	122	90.57%
17	44.71%	103	90.63%
95	46.19%	130	90.65%
35	46.74%	168	90.71%
98	46.74%	11	90.94%
137	48.84%	303	91.08%
140	50.24%	189	91.09%
47	50.77%	142	91.67%
5	51.07%	85	91.71%
34	52.00%	198	91.73%
10	52.94%	155	91.78%
18	53.33%	205	91.84%
3	54.88%	184	91.86%
2	56.06%	204	91.87%
164	56.45%	226	92.21%
23	56.54%	54	92.23%
120	56.65%	228	92.34%
177	57.54%	203	92.39%
53	57.57%	60	92.40%
136	57.62%	108	92.41%
109	58.05%	201	92.41%
75	58.08%	72	92.49%
81	58.24%	224	92.61%
158	58.51%	6	92.62%
83	58.74%	92	92.69%
199	58.97%	76	92.78%
38	62.82%	100	93.00%
56	62.93%	115	93.03%
269	62.94%	61	93.22%
167	63.19%	125	93.60%
31	63.36%	143	93.60%
68	63.82%	57	93.62%
78	63.93%	186	93.73%
46	64.77%	82	94.15%
159	65.09%	50	94.20%
32	65.31%	190	94.37%
49	65.33%	22	94.67%
58	65.87%	42	94.74%
25	65.93%	232	94.79%
99	65.99%	80	94.88%
126	66.29%	73	94.96%
124	66.67%	179	95.05%
230	67.07%	90	95.42%
157	67.31%	45	95.50%
200	67.31%	144	96.00%
64	67.82%	195	96.15%
145	68.13%	127	96.26%
