# Supplementary material for: Identification of candidate genes controlling chilling tolerance of rice in the cold region at the booting stage by BSA-Seq and RNA-Seq
Source: R Soc Open Sci. 2020 Nov 18;7(11):201081. doi: 10.1098/rsos.201081 (PMC7735347; doi:10.1098/rsos.201081)
Supplement: Table S4 [file rsos201081supp4.xls]

## Sheet: Sheet1
Table S4 SNP detection and annotation through BSA-Seq analysis
Type	LJ11 vs LJ25	L-pool vs H-pool
INTERGENIC	103280	13135
INTRAGENIC	2	2
INTRON	13056	704
UPSTREAM	41356	3556
DOWNSTREAM	32955	2682
UTR_5_PRIME	1145	134
UTR_3_PRIME	2652	128
SPLICE_SITE_ACCEPTOR	12	2
SPLICE_SITE_DONOR	16	1
SPLICE_SITE_REGION	216	5
START_GAINED	214	26
START_LOST	10	1
SYNONYMOUS_CODING	2815	354
NON_SYNONYMOUS_CODING	3411	467
SYNONYMOUS_STOP	3	1
STOP_GAINED	63	9
STOP_LOST	24	1
Other	3225	340
Total	204455	21548
