# Supplementary material for: Identification of candidate genes controlling chilling tolerance of rice in the cold region at the booting stage by BSA-Seq and RNA-Seq
Source: R Soc Open Sci. 2020 Nov 18;7(11):201081. doi: 10.1098/rsos.201081 (PMC7735347; doi:10.1098/rsos.201081)
Supplement: Table S5 [file rsos201081supp5.xls]

## Sheet: Sheet1
Table S5 The genes annotated in the candidate regions associated with the SSRPPM identified by the △SNP-index method
#Gene_ID	COG_class	COG_class_annotation	GO_annotation	KEGG_annotation	KOG_class	KOG_class_annotation	Pfam_annotation	Swissprot_annotation	eggNOG_class	eggNOG_class_annotation	nr_annotation
Os06g0572400	--	--	Cellular Component: plasma membrane (GO:0005886);; Biological Process: meristem structural organization (GO:0009933);; Biological Process: radial pattern formation (GO:0009956);; Biological Process: root morphogenesis (GO:0010015);; Biological Process: leaf vascular tissue pattern formation (GO:0010305);; Cellular Component: integral component of membrane (GO:0016021);; Cellular Component: cytopl…	--	--	--	Tetraspanin family	Tetraspanin-2 GN=TET2 OS=Arabidopsis thaliana (Mouse-ear cress) PE=2 SV=1	R	General function prediction only	Os06g0572400 [Oryza sativa Japonica Group]
Os09g0512200	[I]	Lipid transport and metabolism	Biological Process: fatty acid metabolic process (GO:0006631);; Molecular Function: zinc ion binding (GO:0008270);; Cellular Component: chloroplast (GO:0009507);; Molecular Function: fatty acid ligase activity (GO:0015645);;	--	[I]	Lipid transport and metabolism	AMP-binding enzyme	Probable acyl-activating enzyme 16, chloroplastic (Precursor) GN=AAE16 OS=Arabidopsis thaliana (Mouse-ear cress) PE=2 SV=1	R	General function prediction only	Os09g0512200 [Oryza sativa Japonica Group]
Os09g0515100	[O]	Posttranslational modification, protein turnover, chaperones	Molecular Function: ATP binding (GO:0005524);; Molecular Function: nucleoside-triphosphatase activity (GO:0017111);;	--	[O]	Posttranslational modification, protein turnover, chaperones	ATPase family associated with various cellular activities (AAA);; Bromodomain;; IstB-like ATP binding protein;; AAA domain (Cdc48 subfamily);; AAA domain (dynein-related subfamily)	ATPase family AAA domain-containing protein At1g05910 GN=At1g05910 OS=Arabidopsis thaliana (Mouse-ear cress) PE=2 SV=1	O	Posttranslational modification, protein turnover, chaperones	Os09g0515100 [Oryza sativa Japonica Group]
Os09g0513100	--	--	Molecular Function: phosphatidylcholine-sterol O-acyltransferase activity (GO:0004607);; Cellular Component: mitochondrion (GO:0005739);; Biological Process: lipid metabolic process (GO:0006629);;	--	[I]	Lipid transport and metabolism	Lecithin:cholesterol acyltransferase	Phospholipase A(1) LCAT3 GN=LCAT3 OS=Arabidopsis thaliana (Mouse-ear cress) PE=1 SV=1	I	Lipid transport and metabolism	hypothetical protein OsJ_02688 [Oryza sativa Japonica Group]
Os09g0509200	[C]	Energy production and conversion	Molecular Function: phosphogluconate dehydrogenase (decarboxylating) activity (GO:0004616);; Molecular Function: pyruvate dehydrogenase (acetyl-transferring) activity (GO:0004739);; Cellular Component: nucleolus (GO:0005730);; Cellular Component: mitochondrial matrix (GO:0005759);; Cellular Component: plasma membrane (GO:0005886);; Biological Process: acetyl-CoA biosynthetic process from pyruvate…	K00162|0|osa:4347531|Os09g0509200; K00162 pyruvate dehydrogenase E1 component beta subunit [EC:1.2.4.1] (A)	[C]	Energy production and conversion	Transketolase, pyrimidine binding domain;; Transketolase, C-terminal domain	Pyruvate dehydrogenase E1 component subunit beta-2, mitochondrial (Precursor) OS=Oryza sativa subsp. japonica (Rice) PE=2 SV=1	C	Energy production and conversion	Os09g0509200 [Oryza sativa Japonica Group]
Os09g0502033	[J]	Translation, ribosomal structure and biogenesis	Molecular Function: structural constituent of ribosome (GO:0003735);; Cellular Component: nucleolus (GO:0005730);; Cellular Component: mitochondrion (GO:0005739);; Biological Process: translation (GO:0006412);; Cellular Component: cytosolic large ribosomal subunit (GO:0022625);;	K02912|5.1633e-33|bdi:100838317|60S ribosomal protein L32-1-like; K02912 large subunit ribosomal protein L32e (A)	[J]	Translation, ribosomal structure and biogenesis	Ribosomal protein L32	60S ribosomal protein L32-1 GN=RPL32A OS=Arabidopsis thaliana (Mouse-ear cress) PE=2 SV=2	J	Translation, ribosomal structure and biogenesis	PREDICTED: 60S ribosomal protein L32-1-like [Brachypodium distachyon]
Os06g0628500	[G]	Carbohydrate transport and metabolism	Molecular Function: beta-galactosidase activity (GO:0004565);; Biological Process: carbohydrate metabolic process (GO:0005975);; Cellular Component: cytoplasmic membrane-bounded vesicle (GO:0016023);; Molecular Function: carbohydrate binding (GO:0030246);; Cellular Component: apoplast (GO:0048046);;	--	[G]	Carbohydrate transport and metabolism	Glycosyl hydrolases family 35;; Beta-galactosidase	Putative beta-galactosidase 10 (Precursor) OS=Oryza sativa subsp. japonica (Rice) PE=3 SV=1	G	Carbohydrate transport and metabolism	hypothetical protein OsI_23787 [Oryza sativa Indica Group]
Os09g0485950	--	--	--	--	[U]	Intracellular trafficking, secretion, and vesicular transport	PRELI-like family	--	U	Intracellular trafficking, secretion, and vesicular transport	hypothetical protein OsI_31832 [Oryza sativa Indica Group]
Os06g0569601	--	--	--	--	--	--	--	--	--	--	Os06g0569700 [Oryza sativa Japonica Group]
Os09g0500966	--	--	Cellular Component: integral component of membrane (GO:0016021);; Cellular Component: cytoplasmic membrane-bounded vesicle (GO:0016023);;	--	[T]	Signal transduction mechanisms	--	Cytochrome b561 and DOMON domain-containing protein At5g47530 (Precursor) GN=At5g47530 OS=Arabidopsis thaliana (Mouse-ear cress) PE=2 SV=1	T	Signal transduction mechanisms	hypothetical protein OsI_31919 [Oryza sativa Indica Group]
Os09g0516600	[R]	General function prediction only	Molecular Function: nucleotide binding (GO:0000166);; Molecular Function: 3-beta-hydroxy-delta5-steroid dehydrogenase activity (GO:0003854);; Molecular Function: hydroxyacylglutathione hydrolase activity (GO:0004416);; Molecular Function: iron ion binding (GO:0005506);; Cellular Component: endoplasmic reticulum (GO:0005783);; Cellular Component: plasma membrane (GO:0005886);; Biological Process: …	K01069|0|osa:4347581|Os09g0516600; K01069 hydroxyacylglutathione hydrolase [EC:3.1.2.6] (A)	[R]	General function prediction only	Metallo-beta-lactamase superfamily	Probable hydroxyacylglutathione hydrolase 2, chloroplast (Precursor) GN=GLX2-4 OS=Arabidopsis thaliana (Mouse-ear cress) PE=2 SV=1	R	General function prediction only	Os09g0516600 [Oryza sativa Japonica Group]
Os09g0511700	[G]	Carbohydrate transport and metabolism	Biological Process: carbohydrate metabolic process (GO:0005975);; Molecular Function: beta-glucosidase activity (GO:0008422);; Cellular Component: cytoplasmic membrane-bounded vesicle (GO:0016023);;	--	[G]	Carbohydrate transport and metabolism	Glycosyl hydrolase family 1	Beta-glucosidase 32 (Precursor) GN=BGLU32 OS=Oryza sativa subsp. japonica (Rice) PE=2 SV=2	G	Carbohydrate transport and metabolism	Os09g0511700 [Oryza sativa Japonica Group]
Os06g0526600	[LKJ]	--	Molecular Function: RNA binding (GO:0003723);; Molecular Function: ATP binding (GO:0005524);; Cellular Component: mitochondrion (GO:0005739);; Molecular Function: ATP-dependent helicase activity (GO:0008026);; Cellular Component: chloroplast (GO:0009507);;	K17679|0|dosa:Os06t0526600-01|Os06g0526600; Similar to predicted protein.; K17679 ATP-dependent RNA helicase MSS116, mitochondrial [EC:3.6.4.13] (A)	[A]	RNA processing and modification	Helicase conserved C-terminal domain	DEAD-box ATP-dependent RNA helicase 31 OS=Oryza sativa subsp. japonica (Rice) PE=3 SV=2	A	RNA processing and modification	hypothetical protein OsJ_21540 [Oryza sativa Japonica Group]
Os09g0498600	--	--	Molecular Function: RNA binding (GO:0003723);; Cellular Component: plastid (GO:0009536);;	K13162|0|dosa:Os09t0498600-01|Os09g0498600; K Homology, type 1, subgroup domain containing protein.; K13162 poly(rC)-binding protein 2/3/4 (A)	[AR]	--	KH domain;; KH domain;; KH domain;; KH domain	KH domain-containing protein At4g18375 GN=At4g18375 OS=Arabidopsis thaliana (Mouse-ear cress) PE=2 SV=1	A	RNA processing and modification	hypothetical protein OsI_31905 [Oryza sativa Indica Group]
Os06g0524400	--	--	--	--	--	--	GDSL/SGNH-like Acyl-Esterase family found in Pmr5 and Cas1p;; PMR5 N terminal Domain	Protein trichome birefringence-like 24 GN=TBL24 OS=Arabidopsis thaliana (Mouse-ear cress) PE=2 SV=1	S	Function unknown	Os06g0524400 [Oryza sativa Japonica Group]
Os06g0525000	--	--	Cellular Component: plastid (GO:0009536);;	--	--	--	--	--	S	Function unknown	Os06g0525000 [Oryza sativa Japonica Group]
Os09g0503400	[J]	Translation, ribosomal structure and biogenesis	Molecular Function: aminoacyl-tRNA editing activity (GO:0002161);; Molecular Function: leucine-tRNA ligase activity (GO:0004823);; Molecular Function: ATP binding (GO:0005524);; Biological Process: leucyl-tRNA aminoacylation (GO:0006429);; Biological Process: regulation of translational fidelity (GO:0006450);; Cellular Component: chloroplast (GO:0009507);;	K01869|0|osa:4347497|Os09g0503400; K01869 leucyl-tRNA synthetase [EC:6.1.1.4] (A)	[J]	Translation, ribosomal structure and biogenesis	tRNA synthetases class I (I, L, M and V);; tRNA synthetases class I (M);; Anticodon-binding domain of tRNA;; tRNA synthetases class I (C) catalytic domain	--	J	Translation, ribosomal structure and biogenesis	Os09g0503400 [Oryza sativa Japonica Group]
Os09g0491612	--	--	Cellular Component: cytoplasmic membrane-bounded vesicle (GO:0016023);;	--	--	--	Leucine Rich Repeat;; Leucine Rich repeats (2 copies);; Leucine rich repeat;; Leucine Rich repeat;; Leucine rich repeat;; Leucine rich repeat N-terminal domain	Polygalacturonase inhibitor 1 (Precursor) GN=OJ1019_E02.4 OS=Oryza sativa subsp. japonica (Rice) PE=2 SV=1	R	General function prediction only	hypothetical protein OsJ_29841 [Oryza sativa Japonica Group]
Os09g0504000	[MG]	--	Cellular Component: mitochondrion (GO:0005739);; Biological Process: carbohydrate metabolic process (GO:0005975);; Molecular Function: racemase and epimerase activity, acting on carbohydrates and derivatives (GO:0016857);; Biological Process: cellular metabolic process (GO:0044237);; Molecular Function: coenzyme binding (GO:0050662);;	K08679|0|osa:4347499|Os09g0504000; K08679 UDP-glucuronate 4-epimerase [EC:5.1.3.6] (A)	[M]	Cell wall/membrane/envelope biogenesis	NAD dependent epimerase/dehydratase family;; RmlD substrate binding domain;; 3-beta hydroxysteroid dehydrogenase/isomerase family;; Male sterility protein;; short chain dehydrogenase;; Polysaccharide biosynthesis protein	UDP-glucuronate 4-epimerase 6 GN=F14O13.1 OS=Arabidopsis thaliana (Mouse-ear cress) PE=1 SV=1	G	Carbohydrate transport and metabolism	hypothetical protein OsI_31939 [Oryza sativa Indica Group]
Os09g0508900	--	--	Biological Process: ubiquitin-dependent protein catabolic process (GO:0006511);; Biological Process: transport (GO:0006810);; Cellular Component: plastid (GO:0009536);; Cellular Component: integral component of membrane (GO:0016021);;	K13354|0|dosa:Os09t0508900-01|Os09g0508900; Similar to cDNA clone:001-044-E12, full insert sequence.; K13354 solute carrier family 25 (peroxisomal adenine nucleotide transporter), member 17 (A)	[C]	Energy production and conversion	Mitochondrial carrier protein	Peroxisomal nicotinamide adenine dinucleotide carrier GN=T28M21.13 OS=Arabidopsis thaliana (Mouse-ear cress) PE=1 SV=1	C	Energy production and conversion	unnamed protein product [Oryza sativa Japonica Group]
Os06g0626600	--	--	Molecular Function: sulfotransferase activity (GO:0008146);;	--	[R]	General function prediction only	Sulfotransferase domain;; Sulfotransferase family	Cytosolic sulfotransferase 16 GN=F2P9.3 OS=Arabidopsis thaliana (Mouse-ear cress) PE=1 SV=1	R	General function prediction only	Os06g0626600 [Oryza sativa Japonica Group]
Os09g0503250	--	--	Cellular Component: vacuole (GO:0005773);; Cellular Component: plasma membrane (GO:0005886);; Molecular Function: zinc ion binding (GO:0008270);; Cellular Component: chloroplast thylakoid membrane (GO:0009535);; Molecular Function: oxidoreductase activity (GO:0016491);; Biological Process: oxidation-reduction process (GO:0055114);;	--	[CR]	--	--	Quinone-oxidoreductase homolog, chloroplastic GN=QOR OS=Spinacia oleracea (Spinach) PE=1 SV=1	Q	Secondary metabolites biosynthesis, transport and catabolism	hypothetical protein OsI_31936 [Oryza sativa Indica Group]
Os06g0564500	[E]	Amino acid transport and metabolism	Molecular Function: cysteine synthase activity (GO:0004124);; Biological Process: cysteine biosynthetic process from serine (GO:0006535);;	K01738|0|osa:4341321|Os06g0564500; K01738 cysteine synthase A [EC:2.5.1.47] (A)	[E]	Amino acid transport and metabolism	Pyridoxal-phosphate dependent enzyme	Cysteine synthase, chloroplastic/chromoplastic (Precursor) GN=CYSK OS=Spinacia oleracea (Spinach) PE=1 SV=2	E	Amino acid transport and metabolism	Os06g0564500 [Oryza sativa Japonica Group]
Os09g0497100	[J]	Translation, ribosomal structure and biogenesis	Molecular Function: RNA binding (GO:0003723);;	--	[J]	Translation, ribosomal structure and biogenesis	Pumilio-family RNA binding repeat	Pumilio homolog 5 GN=APUM5 OS=Arabidopsis thaliana (Mouse-ear cress) PE=1 SV=2	J	Translation, ribosomal structure and biogenesis	Os09g0497100 [Oryza sativa Japonica Group]
Os09g0512000	[U]	Intracellular trafficking, secretion, and vesicular transport	Biological Process: protein transport (GO:0015031);; Cellular Component: membrane (GO:0016020);; Cellular Component: cytoplasmic membrane-bounded vesicle (GO:0016023);;	K10956|0|osa:4347548|Os09g0512000; K10956 protein transport protein SEC61 subunit alpha (A)	[UO]	--	SecY translocase	Protein transport protein Sec61 subunit alpha OS=Pyrenomonas salina PE=2 SV=1	U	Intracellular trafficking, secretion, and vesicular transport	Os09g0512000 [Oryza sativa Japonica Group]
Os06g0576800	--	--	Cellular Component: mitochondrion (GO:0005739);;	--	--	--	Myb/SANT-like DNA-binding domain	--	R	General function prediction only	hypothetical protein OsJ_21783 [Oryza sativa Japonica Group]
Os06g0527201	--	--	Molecular Function: intracellular cyclic nucleotide activated cation channel activity (GO:0005221);; Molecular Function: inward rectifier potassium channel activity (GO:0005242);; Cellular Component: plasma membrane (GO:0005886);; Biological Process: potassium ion transport (GO:0006813);; Biological Process: calcium ion transport (GO:0006816);; Biological Process: response to fungus (GO:0009620);…	--	[PT]	--	--	Cyclic nucleotide-gated ion channel 1 GN=CNGC1 OS=Arabidopsis thaliana (Mouse-ear cress) PE=1 SV=1	P	Inorganic ion transport and metabolism	Os06g0527100 [Oryza sativa Japonica Group]
Os09g0491868	--	--	Molecular Function: catalytic activity (GO:0003824);; Biological Process: cellular metabolic process (GO:0044237);; Molecular Function: coenzyme binding (GO:0050662);;	--	--	--	--	--	V	Defense mechanisms	Os09g0491868 [Oryza sativa Japonica Group]
Os09g0492700	[I]	Lipid transport and metabolism	Molecular Function: hydroxymethylglutaryl-CoA reductase (NADPH) activity (GO:0004420);; Cellular Component: mitochondrion (GO:0005739);; Cellular Component: endoplasmic reticulum membrane (GO:0005789);; Biological Process: coenzyme A metabolic process (GO:0015936);; Cellular Component: integral component of membrane (GO:0016021);; Cellular Component: cytoplasmic membrane-bounded vesicle (GO:00160…	K00021|0|osa:4347443|Os09g0492700; K00021 hydroxymethylglutaryl-CoA reductase (NADPH) [EC:1.1.1.34] (A)	[I]	Lipid transport and metabolism	Hydroxymethylglutaryl-coenzyme A reductase	3-hydroxy-3-methylglutaryl-coenzyme A reductase 3 OS=Oryza sativa subsp. japonica (Rice) PE=2 SV=2	I	Lipid transport and metabolism	Os09g0492700 [Oryza sativa Japonica Group]
Os09g0483300	--	--	Molecular Function: calcium ion binding (GO:0005509);;	--	--	--	EF hand;; EF hand;; EF-hand domain pair;; EF-hand domain;; EF-hand domain pair	--	T	Signal transduction mechanisms	Os09g0483300 [Oryza sativa Japonica Group]
Os06g0623600	[MG]	--	Molecular Function: catalytic activity (GO:0003824);; Biological Process: cellular metabolic process (GO:0044237);; Molecular Function: coenzyme binding (GO:0050662);;	--	[V]	Defense mechanisms	NAD dependent epimerase/dehydratase family;; NADH(P)-binding;; 3-beta hydroxysteroid dehydrogenase/isomerase family;; Male sterility protein;; short chain dehydrogenase;; KR domain;; Polysaccharide biosynthesis protein	Cinnamoyl-CoA reductase 2 GN=CCR2 OS=Arabidopsis thaliana (Mouse-ear cress) PE=1 SV=1	V	Defense mechanisms	Os06g0623600 [Oryza sativa Japonica Group]
Os06g0576200	--	--	Cellular Component: membrane (GO:0016020);;	--	--	--	--	--	S	Function unknown	hypothetical protein [Oryza sativa Japonica Group]
Os09g0514500	--	--	Biological Process: chromatin silencing (GO:0006342);; Biological Process: regulation of flower development (GO:0009909);; Biological Process: histone H3-K9 methylation (GO:0051567);;	--	--	--	--	--	S	Function unknown	Os09g0514500 [Oryza sativa Japonica Group]
Os09g0510900	--	--	Cellular Component: mitochondrion (GO:0005739);; Cellular Component: plastid (GO:0009536);;	--	--	--	--	FBD-associated F-box protein At5g56370 GN=At5g56370 OS=Arabidopsis thaliana (Mouse-ear cress) PE=2 SV=1	--	--	hypothetical protein OsI_32000 [Oryza sativa Indica Group]
Os09g0503000	[CR]	--	Cellular Component: vacuole (GO:0005773);; Cellular Component: plasma membrane (GO:0005886);; Molecular Function: zinc ion binding (GO:0008270);; Cellular Component: chloroplast thylakoid membrane (GO:0009535);; Molecular Function: oxidoreductase activity (GO:0016491);; Biological Process: oxidation-reduction process (GO:0055114);;	--	[CR]	--	Zinc-binding dehydrogenase;; Zinc-binding dehydrogenase	Putative quinone-oxidoreductase homolog, chloroplastic GN=At4g13010 OS=Arabidopsis thaliana (Mouse-ear cress) PE=2 SV=1	C	Energy production and conversion	Os09g0503000 [Oryza sativa Japonica Group]
Os09g0511300	--	--	--	--	--	--	--	--	S	Function unknown	hypothetical protein OsJ_29982 [Oryza sativa Japonica Group]
Os09g0482900	--	--	Biological Process: metabolic process (GO:0008152);; Cellular Component: cytoplasmic membrane-bounded vesicle (GO:0016023);; Molecular Function: transferase activity, transferring hexosyl groups (GO:0016758);;	--	[GC]	--	UDP-glucoronosyl and UDP-glucosyl transferase	Anthocyanidin 5,3-O-glucosyltransferase GN=RhGT1 OS=Rosa hybrid cultivar PE=2 SV=1	CG	--	Os09g0482900 [Oryza sativa Japonica Group]
Os06g0526800	[T]	Signal transduction mechanisms	Molecular Function: protein serine/threonine phosphatase activity (GO:0004722);; Cellular Component: mitochondrion (GO:0005739);; Biological Process: protein dephosphorylation (GO:0006470);; Molecular Function: metal ion binding (GO:0046872);;	K17506|0|dosa:Os06t0526800-00|Os06g0526800; Probable protein phosphatase 2C 56.; K17506 protein phosphatase 1L [EC:3.1.3.16] (A)	[T]	Signal transduction mechanisms	Protein phosphatase 2C;; Protein phosphatase 2C	Probable protein phosphatase 2C 56 OS=Oryza sativa subsp. japonica (Rice) PE=3 SV=2	T	Signal transduction mechanisms	RecName: Full=Probable protein phosphatase 2C 56; Short=OsPP2C56 [Oryza sativa Japonica Group]
Os09g0517600	--	--	Cellular Component: mitochondrion (GO:0005739);; Cellular Component: integral component of membrane (GO:0016021);;	--	[TZ]	--	Formin Homology 2 Domain	Formin-like protein 15 (Precursor) GN=OSJNBb0034B12.29 OS=Oryza sativa subsp. japonica (Rice) PE=2 SV=1	TZ	--	Os09g0517600 [Oryza sativa Japonica Group]
Os09g0482640	[RTKL]	--	Molecular Function: protein serine/threonine kinase activity (GO:0004674);; Molecular Function: calcium ion binding (GO:0005509);; Molecular Function: ATP binding (GO:0005524);; Biological Process: protein phosphorylation (GO:0006468);; Cellular Component: membrane (GO:0016020);; Cellular Component: cytoplasmic membrane-bounded vesicle (GO:0016023);; Molecular Function: polysaccharide binding (GO…	--	--	--	Protein kinase domain;; Protein tyrosine kinase;; Calcium-binding EGF domain	Wall-associated receptor kinase 3 (Precursor) GN=WAK3 OS=Arabidopsis thaliana (Mouse-ear cress) PE=2 SV=2	T	Signal transduction mechanisms	Os09g0482640 [Oryza sativa Japonica Group]
Os09g0505600	[O]	Posttranslational modification, protein turnover, chaperones	Molecular Function: threonine-type endopeptidase activity (GO:0004298);; Cellular Component: nucleus (GO:0005634);; Cellular Component: proteasome core complex (GO:0005839);; Cellular Component: plasma membrane (GO:0005886);; Biological Process: ubiquitin-dependent protein catabolic process (GO:0006511);; Cellular Component: chloroplast (GO:0009507);; Biological Process: defense response to fungu…	K02732|6.72929e-164|osa:4347507|Os09g0505600; K02732 20S proteasome subunit beta 6 [EC:3.4.25.1] (A)	[O]	Posttranslational modification, protein turnover, chaperones	Proteasome subunit	Proteasome subunit beta type-1 GN=PBF1 OS=Oryza sativa subsp. japonica (Rice) PE=2 SV=1	O	Posttranslational modification, protein turnover, chaperones	Os09g0505600 [Oryza sativa Japonica Group]
Os09g0505800	[F]	Nucleotide transport and metabolism	Molecular Function: uridine kinase activity (GO:0004849);; Molecular Function: ATP binding (GO:0005524);; Cellular Component: plastid (GO:0009536);; Biological Process: phosphorylation (GO:0016310);; Molecular Function: transferase activity, transferring glycosyl groups (GO:0016757);; Molecular Function: phosphotransferase activity, alcohol group as acceptor (GO:0016773);; Biological Process: UMP…	K00876|0|osa:4347509|Os09g0505800; K00876 uridine kinase [EC:2.7.1.48] (A)	[TZ]	--	Uracil phosphoribosyltransferase;; Phosphoribulokinase / Uridine kinase family;; Dephospho-CoA kinase;; AAA domain;; Type II/IV secretion system protein	Putative uracil phosphoribosyltransferase (Precursor) GN=UKL2 OS=Arabidopsis thaliana (Mouse-ear cress) PE=2 SV=1	F	Nucleotide transport and metabolism	Os09g0505800 [Oryza sativa Japonica Group]
Os09g0483150	[O]	Posttranslational modification, protein turnover, chaperones	Biological Process: RNA methylation (GO:0001510);; Molecular Function: structural constituent of ribosome (GO:0003735);; Cellular Component: nucleolus (GO:0005730);; Biological Process: translation (GO:0006412);; Biological Process: embryo development ending in seed dormancy (GO:0009793);; Biological Process: protein ubiquitination (GO:0016567);; Cellular Component: cytosolic large ribosomal subu…	K02927|1.43927e-72|osa:4347409|Os09g0483200; K02927 large subunit ribosomal protein L40e (A)	[J]	Translation, ribosomal structure and biogenesis	Ubiquitin family;; Ubiquitin-2 like Rad60 SUMO-like;; Ribosomal L40e family;; Ubiquitin-like domain	40S ribosomal protein S27a-1 (Precursor) OS=Arabidopsis thaliana (Mouse-ear cress) PE=1 SV=2	J	Translation, ribosomal structure and biogenesis	Os09g0483200 [Oryza sativa Japonica Group]
Os06g0567200	[Q]	Secondary metabolites biosynthesis, transport and catabolism	Molecular Function: copper ion binding (GO:0005507);; Cellular Component: extracellular region (GO:0005576);; Cellular Component: plant-type cell wall (GO:0009505);; Cellular Component: cytoplasmic membrane-bounded vesicle (GO:0016023);; Molecular Function: oxidoreductase activity (GO:0016491);; Biological Process: oxidation-reduction process (GO:0055114);;	K00423|0|dosa:Os06t0567200-01|Os06g0567200; Cupredoxin domain containing protein.; K00423 L-ascorbate oxidase [EC:1.10.3.3] (A)	[Q]	Secondary metabolites biosynthesis, transport and catabolism	Multicopper oxidase;; Multicopper oxidase;; Multicopper oxidase	L-ascorbate oxidase (Precursor) OS=Cucumis sativus (Cucumber) PE=1 SV=1	Q	Secondary metabolites biosynthesis, transport and catabolism	putative ascorbate oxidase AO4 [Oryza sativa Japonica Group]
Os09g0485600	--	--	Molecular Function: nucleic acid binding (GO:0003676);; Cellular Component: nucleus (GO:0005634);; Cellular Component: mitochondrion (GO:0005739);; Biological Process: pollen tube growth (GO:0009860);; Molecular Function: metal ion binding (GO:0046872);;	--	[R]	General function prediction only	--	Zinc finger protein WIP2 OS=Arabidopsis thaliana (Mouse-ear cress) PE=1 SV=1	R	General function prediction only	Os09g0485600 [Oryza sativa Japonica Group]
Os09g0493700	--	--	Molecular Function: DNA binding (GO:0003677);; Biological Process: regulation of transcription, DNA-templated (GO:0006355);;	--	--	--	No apical meristem (NAM) protein	NAC domain-containing protein 78 GN=T32M21.10 OS=Arabidopsis thaliana (Mouse-ear cress) PE=2 SV=2	S	Function unknown	Os09g0493700 [Oryza sativa Japonica Group]
Os06g0571100	[BQ]	--	Molecular Function: histone deacetylase activity (GO:0004407);; Cellular Component: plastid (GO:0009536);; Biological Process: histone deacetylation (GO:0016575);;	K11418|0|osa:4341352|Os06g0571100; K11418 histone deacetylase 11 [EC:3.5.1.98] (A)	[B]	Chromatin structure and dynamics	Histone deacetylase domain	Histone deacetylase 2 GN=HDA2 OS=Arabidopsis thaliana (Mouse-ear cress) PE=2 SV=2	B	Chromatin structure and dynamics	Os06g0571100 [Oryza sativa Japonica Group]
Os09g0491708	--	--	Molecular Function: DNA binding (GO:0003677);; Cellular Component: plastid (GO:0009536);;	--	--	--	Domain of unknown function (DUF296);; AT hook motif	Putative DNA-binding protein ESCAROLA GN=ESC OS=Arabidopsis thaliana (Mouse-ear cress) PE=2 SV=1	S	Function unknown	Os09g0491708 [Oryza sativa Japonica Group]
Os09g0499500	--	--	--	--	--	--	Domain of unknown function (DUF2828)	--	S	Function unknown	Os09g0499500 [Oryza sativa Japonica Group]
Os09g0516300	--	--	Molecular Function: nucleotide binding (GO:0000166);; Cellular Component: chromatin (GO:0000785);; Molecular Function: RNA binding (GO:0003723);; Biological Process: mRNA polyadenylation (GO:0006378);; Biological Process: embryo sac development (GO:0009553);; Biological Process: embryo development (GO:0009790);; Biological Process: positive regulation of flower development (GO:0009911);; Biologic…	--	[R]	General function prediction only	RNA recognition motif. (a.k.a. RRM, RBD, or RNP domain);; RNA recognition motif (a.k.a. RRM, RBD, or RNP domain);; RNA recognition motif. (a.k.a. RRM, RBD, or RNP domain);; SPOC domain;; RNA binding motif	Flowering time control protein FPA GN=FPA OS=Arabidopsis thaliana (Mouse-ear cress) PE=2 SV=2	R	General function prediction only	Os09g0516300 [Oryza sativa Japonica Group]
Os09g0497500	--	--	Biological Process: proteolysis (GO:0006508);; Molecular Function: cysteine-type peptidase activity (GO:0008234);; Cellular Component: cytoplasmic membrane-bounded vesicle (GO:0016023);;	--	[O]	Posttranslational modification, protein turnover, chaperones	Papain family cysteine protease;; Cathepsin propeptide inhibitor domain (I29)	Senescence-specific cysteine protease SAG12 {ECO:0000305} (Precursor) OS=Arabidopsis thaliana (Mouse-ear cress) PE=1 SV=1	O	Posttranslational modification, protein turnover, chaperones	Os09g0497500 [Oryza sativa Japonica Group]
Os09g0482620	[P]	Inorganic ion transport and metabolism	Biological Process: sodium ion transport (GO:0006814);; Biological Process: regulation of pH (GO:0006885);; Molecular Function: sodium:proton antiporter activity (GO:0015385);; Cellular Component: integral component of membrane (GO:0016021);; Biological Process: transmembrane transport (GO:0055085);;	K14724|4.91158e-116|dosa:Os09t0482620-00|Os09g0482620; Similar to Sodium/hydrogen exchanger 6.; K14724 solute carrier family 9 (sodium/hydrogen exchanger), member 8 (A)	[P]	Inorganic ion transport and metabolism	Sodium/hydrogen exchanger family	Sodium/hydrogen exchanger 6 GN=NHX6 OS=Arabidopsis thaliana (Mouse-ear cress) PE=1 SV=3	P	Inorganic ion transport and metabolism	PREDICTED: sodium/hydrogen exchanger 6-like [Brachypodium distachyon]
Os06g0572000	--	--	--	--	--	--	--	--	--	--	Os06g0572000 [Oryza sativa Japonica Group]
Os06g0526700	[T]	Signal transduction mechanisms	Molecular Function: protein serine/threonine phosphatase activity (GO:0004722);; Cellular Component: mitochondrion (GO:0005739);; Biological Process: protein dephosphorylation (GO:0006470);; Molecular Function: metal ion binding (GO:0046872);;	K17506|0|dosa:Os06t0526700-00|Os06g0526700; Probable protein phosphatase 2C 55.; K17506 protein phosphatase 1L [EC:3.1.3.16] (A)	[T]	Signal transduction mechanisms	Protein phosphatase 2C;; Protein phosphatase 2C	Probable protein phosphatase 2C 55 OS=Oryza sativa subsp. japonica (Rice) PE=2 SV=2	T	Signal transduction mechanisms	RecName: Full=Probable protein phosphatase 2C 55; Short=OsPP2C55 [Oryza sativa Japonica Group]
Os06g0571300	--	--	Cellular Component: mitochondrion (GO:0005739);;	--	--	--	--	--	S	Function unknown	hypothetical protein ZEAMMB73_896032 [Zea mays]
Os06g0569900	[Q]	Secondary metabolites biosynthesis, transport and catabolism	Molecular Function: monooxygenase activity (GO:0004497);; Molecular Function: iron ion binding (GO:0005506);; Cellular Component: endoplasmic reticulum (GO:0005783);; Molecular Function: electron carrier activity (GO:0009055);; Biological Process: gibberellin biosynthetic process (GO:0009686);; Cellular Component: chloroplast outer membrane (GO:0009707);; Biological Process: gibberellic acid medi…	K04122|0|osa:4341345|Os06g0569900; K04122 ent-kaurene oxidase [EC:1.14.13.78] (A)	[Q]	Secondary metabolites biosynthesis, transport and catabolism	Cytochrome P450	Ent-kaurene oxidase-like 3 {ECO:0000303|PubMed:15316288} OS=Oryza sativa subsp. japonica (Rice) PE=2 SV=1	Q	Secondary metabolites biosynthesis, transport and catabolism	Os06g0569900 [Oryza sativa Japonica Group]
Os09g0491789	--	--	--	--	--	--	--	--	S	Function unknown	PREDICTED: uncharacterized protein LOC101772236 [Setaria italica]
Os09g0498300	--	--	Cellular Component: cytoplasmic membrane-bounded vesicle (GO:0016023);;	--	--	--	Thaumatin family	Glucan endo-1,3-beta-glucosidase (Precursor) OS=Prunus avium (Cherry) PE=1 SV=1	R	General function prediction only	hypothetical protein OsI_31903 [Oryza sativa Indica Group]
Os06g0565250	--	--	Molecular Function: sequence-specific DNA binding transcription factor activity (GO:0003700);; Cellular Component: nucleus (GO:0005634);; Cellular Component: cytoplasm (GO:0005737);; Biological Process: regulation of transcription, DNA-templated (GO:0006355);; Biological Process: response to heat (GO:0009408);; Molecular Function: sequence-specific DNA binding (GO:0043565);;	K09419|2.72488e-47|osa:4341326|Os06g0565200; K09419 heat shock transcription factor, other eukaryote (A)	[K]	Transcription	--	Putative heat stress transcription factor A-6a OS=Oryza sativa subsp. japonica (Rice) PE=3 SV=1	K	Transcription	Os06g0565200 [Oryza sativa Japonica Group]
Os06g0578700	[R]	General function prediction only	Cellular Component: cytoplasmic membrane-bounded vesicle (GO:0016023);;	--	--	--	von Willebrand factor type A domain;; von Willebrand factor type A domain;; von Willebrand factor type A domain	--	R	General function prediction only	Os06g0576900 [Oryza sativa Japonica Group]
Os09g0503700	--	--	Cellular Component: mitochondrion (GO:0005739);;	--	--	--	--	--	--	--	Os09g0503700 [Oryza sativa Japonica Group]
Os06g0628032	--	--	Biological Process: carbohydrate transport (GO:0008643);; Cellular Component: membrane (GO:0016020);;	--	[G]	Carbohydrate transport and metabolism	--	--	G	Carbohydrate transport and metabolism	sugar transport protein-like [Oryza sativa Japonica Group]
Os09g0512900	--	--	Cellular Component: mitochondrion (GO:0005739);; Cellular Component: cytosol (GO:0005829);; Cellular Component: plasma membrane (GO:0005886);;	--	[T]	Signal transduction mechanisms	--	--	T	Signal transduction mechanisms	Os09g0512900 [Oryza sativa Japonica Group]
Os09g0491788	[MG]	--	Molecular Function: catalytic activity (GO:0003824);; Biological Process: cellular metabolic process (GO:0044237);; Biological Process: response to cadmium ion (GO:0046686);; Molecular Function: coenzyme binding (GO:0050662);;	--	[V]	Defense mechanisms	NAD dependent epimerase/dehydratase family;; 3-beta hydroxysteroid dehydrogenase/isomerase family;; NADH(P)-binding;; Male sterility protein;; KR domain;; Polysaccharide biosynthesis protein;; NmrA-like family;; short chain dehydrogenase	Cinnamoyl-CoA reductase 1 GN=T24D18.5 OS=Arabidopsis thaliana (Mouse-ear cress) PE=1 SV=1	Q	Secondary metabolites biosynthesis, transport and catabolism	Os09g0491788 [Oryza sativa Japonica Group]
Os09g0491852	[MG]	--	Molecular Function: catalytic activity (GO:0003824);; Biological Process: cellular metabolic process (GO:0044237);; Biological Process: response to cadmium ion (GO:0046686);; Molecular Function: coenzyme binding (GO:0050662);;	--	[V]	Defense mechanisms	NAD dependent epimerase/dehydratase family;; 3-beta hydroxysteroid dehydrogenase/isomerase family;; NADH(P)-binding;; Male sterility protein;; KR domain;; short chain dehydrogenase;; NmrA-like family;; Polysaccharide biosynthesis protein	Cinnamoyl-CoA reductase 1 GN=T24D18.5 OS=Arabidopsis thaliana (Mouse-ear cress) PE=1 SV=1	Q	Secondary metabolites biosynthesis, transport and catabolism	Os09g0491852 [Oryza sativa Japonica Group]
Os06g0622300	--	--	Molecular Function: DNA binding (GO:0003677);; Cellular Component: nucleus (GO:0005634);;	--	[K]	Transcription	ARID/BRIGHT DNA binding domain;; Hsp20/alpha crystallin family	AT-rich interactive domain-containing protein 3 GN=ARID3 OS=Arabidopsis thaliana (Mouse-ear cress) PE=1 SV=1	K	Transcription	Os06g0622300 [Oryza sativa Japonica Group]
Os09g0487500	--	--	Cellular Component: mitochondrial respiratory chain complex I (GO:0005747);;	--	--	--	ESSS subunit of NADH:ubiquinone oxidoreductase (complex I)	--	S	Function unknown	Os09g0487500 [Oryza sativa Japonica Group]
Os09g0502000	[J]	Translation, ribosomal structure and biogenesis	Molecular Function: structural constituent of ribosome (GO:0003735);; Cellular Component: nucleolus (GO:0005730);; Cellular Component: mitochondrion (GO:0005739);; Biological Process: translation (GO:0006412);; Cellular Component: plastid (GO:0009536);; Cellular Component: cytosolic large ribosomal subunit (GO:0022625);;	K02912|2.5851e-83|osa:4347488|Os09g0502000; K02912 large subunit ribosomal protein L32e (A)	[J]	Translation, ribosomal structure and biogenesis	Ribosomal protein L32	60S ribosomal protein L32-1 GN=RPL32A OS=Arabidopsis thaliana (Mouse-ear cress) PE=2 SV=2	J	Translation, ribosomal structure and biogenesis	Os09g0502000 [Oryza sativa Japonica Group]
Os09g0511200	--	--	--	--	--	--	--	--	S	Function unknown	hypothetical protein OsI_32011 [Oryza sativa Indica Group]
Os06g0625400	--	--	Molecular Function: metalloendopeptidase activity (GO:0004222);; Cellular Component: mitochondrion (GO:0005739);; Biological Process: proteolysis (GO:0006508);; Molecular Function: zinc ion binding (GO:0008270);; Cellular Component: chloroplast stroma (GO:0009570);; Biological Process: embryo development ending in seed dormancy (GO:0009793);;	--	[O]	Posttranslational modification, protein turnover, chaperones	Peptidase M16 inactive domain	--	O	Posttranslational modification, protein turnover, chaperones	Os06g0625400 [Oryza sativa Japonica Group]
Os09g0515500	[J]	Translation, ribosomal structure and biogenesis	Molecular Function: translation initiation factor activity (GO:0003743);; Molecular Function: GTPase activity (GO:0003924);; Molecular Function: GTP binding (GO:0005525);; Cellular Component: mitochondrion (GO:0005739);; Biological Process: GTP catabolic process (GO:0006184);; Biological Process: translational initiation (GO:0006413);; Biological Process: nucleotide biosynthetic process (GO:00091…	K02519|0|osa:4347576|Os09g0515500; K02519 translation initiation factor IF-2 (A)	[J]	Translation, ribosomal structure and biogenesis	Elongation factor Tu GTP binding domain;; Translation-initiation factor 2;; Miro-like protein;; 50S ribosome-binding GTPase;; Elongation factor Tu domain 2;; Ethanolamine utilisation - propanediol utilisation;; Ferrous iron transport protein B	Translation initiation factor IF-2, chloroplastic (Fragment) GN=INFB OS=Euglena gracilis PE=2 SV=1	J	Translation, ribosomal structure and biogenesis	Os09g0515500 [Oryza sativa Japonica Group]
Os09g0482550	--	--	Molecular Function: ATP binding (GO:0005524);; Cellular Component: cell wall (GO:0005618);; Cellular Component: nucleolus (GO:0005730);; Cellular Component: mitochondrion (GO:0005739);; Cellular Component: cytosol (GO:0005829);; Cellular Component: plasma membrane (GO:0005886);; Biological Process: protein folding (GO:0006457);; Biological Process: defense response (GO:0006952);; Biological Proce…	--	--	--	Late embryogenesis abundant protein 18	--	O	Posttranslational modification, protein turnover, chaperones	hypothetical protein OsJ_29787 [Oryza sativa Japonica Group]
Os06g0574332	--	--	--	--	--	--	--	--	S	Function unknown	PREDICTED: uncharacterized protein LOC102721745 [Oryza brachyantha]
Os06g0620550	--	--	Cellular Component: cytoplasmic membrane-bounded vesicle (GO:0016023);;	--	--	--	--	--	R	General function prediction only	hypothetical protein OsJ_21997 [Oryza sativa Japonica Group]
Os06g0627500	--	--	Biological Process: response to molecule of bacterial origin (GO:0002237);; Biological Process: signal transduction (GO:0007165);; Biological Process: pollen tube growth (GO:0009860);; Biological Process: stomatal complex morphogenesis (GO:0010103);; Cellular Component: cytoplasmic membrane-bounded vesicle (GO:0016023);; Cellular Component: apical plasma membrane (GO:0016324);; Cellular Component…	--	[R]	General function prediction only	Leucine rich repeat;; Leucine Rich repeats (2 copies);; Leucine Rich Repeat;; Leucine rich repeat;; Leucine Rich repeat	Protein TOO MANY MOUTHS (Precursor) GN=F18B13.16 OS=Arabidopsis thaliana (Mouse-ear cress) PE=1 SV=1	R	General function prediction only	Os06g0627500 [Oryza sativa Japonica Group]
Os06g0570566	[Q]	Secondary metabolites biosynthesis, transport and catabolism	Molecular Function: monooxygenase activity (GO:0004497);; Molecular Function: iron ion binding (GO:0005506);; Cellular Component: endoplasmic reticulum (GO:0005783);; Molecular Function: electron carrier activity (GO:0009055);; Cellular Component: chloroplast outer membrane (GO:0009707);; Biological Process: ent-kaurene oxidation to kaurenoic acid (GO:0010241);; Molecular Function: oxidoreductase…	K04122|1.33009e-144|dosa:Os06t0570566-00|Os06g0570566; Similar to Ent-kaurene oxidase.; K04122 ent-kaurene oxidase [EC:1.14.13.78] (A)	[Q]	Secondary metabolites biosynthesis, transport and catabolism	Cytochrome P450	Ent-kaurene oxidase 2 OS=Oryza sativa subsp. japonica (Rice) PE=1 SV=1	Q	Secondary metabolites biosynthesis, transport and catabolism	Os06g0570566 [Oryza sativa Japonica Group]
Os06g0566700	--	--	--	--	--	--	--	--	--	--	Os06g0566801 [Oryza sativa Japonica Group]
Os06g0564100	--	--	--	--	--	--	Domain of unknown function (DUF3511)	--	S	Function unknown	Os06g0564000 [Oryza sativa Japonica Group]
Os09g0482650	--	--	Molecular Function: protein serine/threonine kinase activity (GO:0004674);; Molecular Function: calcium ion binding (GO:0005509);; Molecular Function: ATP binding (GO:0005524);; Biological Process: protein phosphorylation (GO:0006468);; Cellular Component: membrane (GO:0016020);; Cellular Component: cytoplasmic membrane-bounded vesicle (GO:0016023);; Molecular Function: polysaccharide binding (GO…	--	--	--	Wall-associated receptor kinase galacturonan-binding	--	T	Signal transduction mechanisms	hypothetical protein OsI_31803 [Oryza sativa Indica Group]
Os06g0624100	[O]	Posttranslational modification, protein turnover, chaperones	Molecular Function: serine-type endopeptidase activity (GO:0004252);; Biological Process: proteolysis (GO:0006508);; Cellular Component: cytoplasmic membrane-bounded vesicle (GO:0016023);; Molecular Function: identical protein binding (GO:0042802);; Biological Process: negative regulation of catalytic activity (GO:0043086);;	--	--	--	Subtilase family;; PA domain;; Peptidase inhibitor I9	Subtilisin-like protease SBT5.3 (Precursor) OS=Arabidopsis thaliana (Mouse-ear cress) PE=2 SV=1	O	Posttranslational modification, protein turnover, chaperones	Os06g0624100 [Oryza sativa Japonica Group]
Os09g0482761	--	--	--	--	--	--	Fasciclin domain	Fasciclin-like arabinogalactan protein 7 (Precursor) GN=FLA7 OS=Arabidopsis thaliana (Mouse-ear cress) PE=1 SV=1	R	General function prediction only	Os09g0482780 [Oryza sativa Japonica Group]
Os09g0508250	--	--	Molecular Function: protein binding (GO:0005515);; Cellular Component: integral component of plasma membrane (GO:0005887);; Biological Process: copper ion transport (GO:0006825);; Biological Process: carbohydrate transport (GO:0008643);; Cellular Component: plastid (GO:0009536);; Biological Process: defense response to bacterium (GO:0042742);; Molecular Function: sugar transmembrane transporter a…	K15382|2.52162e-107|dosa:Os09t0508250-00|Os09g0508250; Similar to MTN3.; K15382 solute carrier family 50 (sugar transporter) (A)	[R]	General function prediction only	Sugar efflux transporter for intercellular exchange	Bidirectional sugar transporter SWEET11 OS=Oryza sativa subsp. japonica (Rice) PE=1 SV=1	R	General function prediction only	hypothetical protein OsJ_29956 [Oryza sativa Japonica Group]
Os09g0507500	--	--	Molecular Function: peroxidase activity (GO:0004601);; Biological Process: response to oxidative stress (GO:0006979);; Cellular Component: cytoplasmic membrane-bounded vesicle (GO:0016023);; Molecular Function: heme binding (GO:0020037);; Molecular Function: metal ion binding (GO:0046872);; Biological Process: oxidation-reduction process (GO:0055114);;	K00430|0|osa:4347520|Os09g0507500; K00430 peroxidase [EC:1.11.1.7] (A)	--	--	Peroxidase	Peroxidase 73 (Precursor) GN=K8K14.13 OS=Arabidopsis thaliana (Mouse-ear cress) PE=1 SV=1	G	Carbohydrate transport and metabolism	Os09g0507500 [Oryza sativa Japonica Group]
Os06g0619650	--	--	Molecular Function: protein serine/threonine kinase activity (GO:0004674);; Molecular Function: ATP binding (GO:0005524);; Biological Process: protein phosphorylation (GO:0006468);; Cellular Component: cytoplasmic membrane-bounded vesicle (GO:0016023);;	--	--	--	D-mannose binding lectin	G-type lectin S-receptor-like serine/threonine-protein kinase RLK1 (Precursor) GN=RLK1 OS=Arabidopsis thaliana (Mouse-ear cress) PE=2 SV=2	T	Signal transduction mechanisms	putative S-receptor kinase [Oryza sativa Japonica Group]
Os09g0498800	--	--	Cellular Component: Golgi apparatus (GO:0005794);; Cellular Component: plant-type cell wall (GO:0009505);;	--	--	--	GDP-fucose protein O-fucosyltransferase	--	S	Function unknown	Os09g0498800 [Oryza sativa Japonica Group]
Os09g0483400	[O]	Posttranslational modification, protein turnover, chaperones	Molecular Function: structural constituent of ribosome (GO:0003735);; Cellular Component: ribosome (GO:0005840);; Biological Process: translation (GO:0006412);;	K08770|3.34161e-29|cmo:103484592|polyubiquitin-like; K08770 ubiquitin C (A)	[J]	Translation, ribosomal structure and biogenesis	Ubiquitin family;; Ubiquitin-2 like Rad60 SUMO-like	60S ribosomal protein L40 (Precursor) OS=Brassica rapa subsp. pekinensis (Chinese cabbage) PE=2 SV=2	T	Signal transduction mechanisms	PREDICTED: polyubiquitin-like [Cucumis melo]
Os06g0524500	--	--	Cellular Component: plastid (GO:0009536);;	--	--	--	--	--	S	Function unknown	Os06g0524500 [Oryza sativa Japonica Group]
Os06g0621500	--	--	Molecular Function: nucleotide binding (GO:0000166);; Molecular Function: nucleic acid binding (GO:0003676);; Molecular Function: protein kinase activity (GO:0004672);; Cellular Component: mitochondrion (GO:0005739);; Biological Process: phosphorylation (GO:0016310);; Molecular Function: ion binding (GO:0043167);; Biological Process: primary metabolic process (GO:0044238);; Biological Process: ce…	--	--	--	Reverse transcriptase-like	--	R	General function prediction only	hypothetical protein OsJ_19645 [Oryza sativa Japonica Group]
Os09g0508500	--	--	Molecular Function: RNA binding (GO:0003723);;	--	--	--	Double-stranded RNA binding motif;; double strand RNA binding domain from DEAD END PROTEIN 1	Double-stranded RNA-binding protein 5 OS=Oryza sativa subsp. japonica (Rice) PE=2 SV=1	R	General function prediction only	RecName: Full=Double-stranded RNA-binding protein 5; AltName: Full=dsRNA-binding protein 2; Short=OsDRB2; AltName: Full=dsRNA-binding protein 5 [Oryza sativa Japonica Group]
Os09g0502900	--	--	Cellular Component: mitochondrion (GO:0005739);; Cellular Component: cytoplasmic membrane-bounded vesicle (GO:0016023);;	--	--	--	--	Putative F-box/LRR-repeat protein At5g02700 GN=At5g02700 OS=Arabidopsis thaliana (Mouse-ear cress) PE=4 SV=1	R	General function prediction only	hypothetical protein OsJ_29917 [Oryza sativa Japonica Group]
Os09g0514400	[O]	Posttranslational modification, protein turnover, chaperones	Molecular Function: farnesyltranstransferase activity (GO:0004311);; Molecular Function: CAAX-protein geranylgeranyltransferase activity (GO:0004662);; Cellular Component: CAAX-protein geranylgeranyltransferase complex (GO:0005953);; Cellular Component: protein farnesyltransferase complex (GO:0005965);; Biological Process: regulation of cell shape (GO:0008360);; Biological Process: response to wa…	K05955|0|osa:4347566|Os09g0514400; K05955 protein farnesyltransferase/geranylgeranyltransferase type-1 subunit alpha [EC:2.5.1.58 2.5.1.59] (A)	[O]	Posttranslational modification, protein turnover, chaperones	Protein prenyltransferase alpha subunit repeat	Protein farnesyltransferase/geranylgeranyltransferase type-1 subunit alpha GN=FTA OS=Pisum sativum (Garden pea) PE=1 SV=1	O	Posttranslational modification, protein turnover, chaperones	Os09g0514400 [Oryza sativa Japonica Group]
Os06g0574400	--	--	Biological Process: cell differentiation (GO:0030154);;	--	[S]	Function unknown	--	--	S	Function unknown	hypothetical protein [Oryza sativa Japonica Group]
Os09g0501600	--	--	Cellular Component: nucleus (GO:0005634);; Molecular Function: protein dimerization activity (GO:0046983);;	--	--	--	Helix-loop-helix DNA-binding domain	Transcription factor bHLH49 GN=T6L1.10 OS=Arabidopsis thaliana (Mouse-ear cress) PE=1 SV=1	K	Transcription	hypothetical protein OsI_31923 [Oryza sativa Indica Group]
Os09g0506150	--	--	Molecular Function: acid phosphatase activity (GO:0003993);; Molecular Function: protein serine/threonine phosphatase activity (GO:0004722);; Cellular Component: extracellular region (GO:0005576);; Cellular Component: cell wall (GO:0005618);; Cellular Component: cytoplasmic membrane-bounded vesicle (GO:0016023);; Molecular Function: metal ion binding (GO:0046872);;	--	[G]	Carbohydrate transport and metabolism	Iron/zinc purple acid phosphatase-like protein C	Probable inactive purple acid phosphatase 27 (Precursor) GN=PAP27 OS=Arabidopsis thaliana (Mouse-ear cress) PE=2 SV=1	G	Carbohydrate transport and metabolism	hypothetical protein OsJ_29936 [Oryza sativa Japonica Group]
Os09g0524300	[V]	Defense mechanisms	Cellular Component: mitochondrion (GO:0005739);; Biological Process: drug transmembrane transport (GO:0006855);; Molecular Function: drug transmembrane transporter activity (GO:0015238);; Molecular Function: antiporter activity (GO:0015297);; Cellular Component: membrane (GO:0016020);;	--	[R]	General function prediction only	MatE	MATE efflux family protein 5 GN=F3L12.12 OS=Arabidopsis thaliana (Mouse-ear cress) PE=3 SV=1	S	Function unknown	Os09g0524300 [Oryza sativa Japonica Group]
Os06g0526100	--	--	Cellular Component: nucleus (GO:0005634);; Molecular Function: protein dimerization activity (GO:0046983);;	--	--	--	Helix-loop-helix DNA-binding domain	Transcription factor SPEECHLESS GN=MFH8.15 OS=Arabidopsis thaliana (Mouse-ear cress) PE=1 SV=1	K	Transcription	Os06g0526100 [Oryza sativa Japonica Group]
Os09g0497700	--	--	Cellular Component: endoplasmic reticulum (GO:0005783);; Cellular Component: plasma membrane (GO:0005886);; Cellular Component: cytoplasmic membrane-bounded vesicle (GO:0016023);;	--	--	--	--	--	R	General function prediction only	Os09g0497700 [Oryza sativa Japonica Group]
Os06g0571400	--	--	Molecular Function: translation elongation factor activity (GO:0003746);; Molecular Function: copper ion binding (GO:0005507);; Cellular Component: cell wall (GO:0005618);; Cellular Component: vacuole (GO:0005773);; Cellular Component: eukaryotic translation elongation factor 1 complex (GO:0005853);; Cellular Component: plasma membrane (GO:0005886);; Biological Process: translational elongation (…	K03233|0|osa:4341354|Os06g0571400; K03233 elongation factor 1-gamma (A)	[O]	Posttranslational modification, protein turnover, chaperones	Elongation factor 1 gamma, conserved domain;; Glutathione S-transferase, N-terminal domain;; Glutathione S-transferase, N-terminal domain;; Glutathione S-transferase, C-terminal domain;; Glutathione S-transferase, N-terminal domain;; Glutathione S-transferase, C-terminal domain;; Glutathione S-transferase, C-terminal domain	Elongation factor 1-gamma 3 OS=Oryza sativa subsp. japonica (Rice) PE=2 SV=1	J	Translation, ribosomal structure and biogenesis	hypothetical protein OsJ_21756 [Oryza sativa Japonica Group]
Os09g0514600	[C]	Energy production and conversion	Cellular Component: mitochondrion (GO:0005739);; Biological Process: ubiquitin-dependent protein catabolic process (GO:0006511);; Molecular Function: electron carrier activity (GO:0009055);; Cellular Component: chloroplast (GO:0009507);; Biological Process: photorespiration (GO:0009853);; Molecular Function: iron-sulfur cluster binding (GO:0051536);; Biological Process: response to misfolded prot…	--	[C]	Energy production and conversion	--	--	C	Energy production and conversion	Os09g0514600 [Oryza sativa Japonica Group]
Os09g0513500	--	--	Cellular Component: nucleus (GO:0005634);; Cellular Component: cytoplasm (GO:0005737);; Biological Process: positive regulation of flower development (GO:0009911);; Biological Process: photoperiodism, flowering (GO:0048573);;	--	[R]	General function prediction only	Phosphatidylethanolamine-binding protein	Protein FLOWERING LOCUS T GN=FT OS=Arabidopsis thaliana (Mouse-ear cress) PE=1 SV=2	R	General function prediction only	PREDICTED: protein FLOWERING LOCUS T-like [Oryza brachyantha]
Os06g0527800	--	--	Cellular Component: nucleus (GO:0005634);; Molecular Function: abscisic acid binding (GO:0010427);;	K14496|2.73618e-142|osa:4341193|Os06g0527800; K14496 abscisic acid receptor PYR/PYL family (A)	--	--	Polyketide cyclase / dehydrase and lipid transport	Abscisic acid receptor PYL8 GN=MFH8.10 OS=Arabidopsis thaliana (Mouse-ear cress) PE=1 SV=1	R	General function prediction only	Os06g0527800 [Oryza sativa Japonica Group]
Os09g0482720	--	--	Cellular Component: vacuole (GO:0005773);; Cellular Component: plasma membrane (GO:0005886);; Molecular Function: lipid binding (GO:0008289);; Cellular Component: cytoplasmic membrane-bounded vesicle (GO:0016023);;	K05399|0|dosa:Os09t0482720-00|Os09g0482720; Similar to lipid binding protein.; K05399 lipopolysaccharide-binding protein (A)	[V]	Defense mechanisms	LBP / BPI / CETP family, C-terminal domain;; LBP / BPI / CETP family, N-terminal domain	Putative BPI/LBP family protein At1g04970 (Precursor) GN=At1g04970 OS=Arabidopsis thaliana (Mouse-ear cress) PE=2 SV=1	V	Defense mechanisms	PREDICTED: putative BPI/LBP family protein At1g04970-like, partial [Oryza brachyantha]
Os09g0515800	[R]	General function prediction only	Molecular Function: Rab GTPase activator activity (GO:0005097);; Cellular Component: intracellular (GO:0005622);; Biological Process: positive regulation of Rab GTPase activity (GO:0032851);; Biological Process: response to cadmium ion (GO:0046686);;	--	[U]	Intracellular trafficking, secretion, and vesicular transport	Rab-GTPase-TBC domain	--	U	Intracellular trafficking, secretion, and vesicular transport	Os09g0515800 [Oryza sativa Japonica Group]
Os06g0565150	--	--	Molecular Function: monooxygenase activity (GO:0004497);; Molecular Function: iron ion binding (GO:0005506);; Molecular Function: electron carrier activity (GO:0009055);; Biological Process: auxin polar transport (GO:0009926);; Biological Process: regulation of meristem structural organization (GO:0009934);; Biological Process: positive regulation of flavonoid biosynthetic process (GO:0009963);; …	--	[Q]	Secondary metabolites biosynthesis, transport and catabolism	--	Cytochrome P450 711A1 OS=Arabidopsis thaliana (Mouse-ear cress) PE=2 SV=1	Q	Secondary metabolites biosynthesis, transport and catabolism	hypothetical protein OsJ_21727 [Oryza sativa Japonica Group]
Os09g0485050	[P]	Inorganic ion transport and metabolism	Cellular Component: vacuole (GO:0005773);; Biological Process: sodium ion transport (GO:0006814);; Molecular Function: malate transmembrane transporter activity (GO:0015140);; Cellular Component: membrane (GO:0016020);; Biological Process: malate transmembrane transport (GO:0071423);;	--	[P]	Inorganic ion transport and metabolism	Sodium:sulfate symporter transmembrane region	Tonoplast dicarboxylate transporter GN=MNJ7.15 OS=Arabidopsis thaliana (Mouse-ear cress) PE=2 SV=2	P	Inorganic ion transport and metabolism	hypothetical protein OsJ_29813 [Oryza sativa Japonica Group]
Os06g0619132	--	--	Molecular Function: protein serine/threonine kinase activity (GO:0004674);; Molecular Function: ATP binding (GO:0005524);; Biological Process: protein phosphorylation (GO:0006468);; Cellular Component: cytoplasmic membrane-bounded vesicle (GO:0016023);;	--	--	--	--	--	T	Signal transduction mechanisms	hypothetical protein OsJ_21988 [Oryza sativa Japonica Group]
Os09g0513200	[GER]	--	Biological Process: transport (GO:0006810);; Cellular Component: integral component of membrane (GO:0016021);;	K15287|0|dosa:Os09t0513200-00|Os09g0513200; Similar to Solute carrier family 35, member F1.; K15287 solute carrier family 35, member F1/2 (A)	[S]	Function unknown	Eukaryotic protein of unknown function (DUF914);; EamA-like transporter family;; UAA transporter family;; Triose-phosphate Transporter family	--	S	Function unknown	hypothetical protein OsI_32704 [Oryza sativa Indica Group]
Os09g0484300	--	--	Molecular Function: ubiquitin-protein transferase activity (GO:0004842);; Cellular Component: nucleus (GO:0005634);; Cellular Component: cytoplasm (GO:0005737);; Biological Process: hormone-mediated signaling pathway (GO:0009755);; Biological Process: leaf senescence (GO:0010150);; Biological Process: protein ubiquitination involved in ubiquitin-dependent protein catabolic process (GO:0042787);;	K10591|0|osa:4347416|Os09g0484300; K10591 E3 ubiquitin-protein ligase NEDD4 [EC:6.3.2.19] (A)	[O]	Posttranslational modification, protein turnover, chaperones	HECT-domain (ubiquitin-transferase)	E3 ubiquitin-protein ligase UPL5 GN=UPL5 OS=Arabidopsis thaliana (Mouse-ear cress) PE=1 SV=1	O	Posttranslational modification, protein turnover, chaperones	Os09g0484300 [Oryza sativa Japonica Group]
Os06g0619600	[RTKL]	--	Molecular Function: protein serine/threonine kinase activity (GO:0004674);; Molecular Function: ATP binding (GO:0005524);; Biological Process: protein phosphorylation (GO:0006468);; Cellular Component: cytoplasmic membrane-bounded vesicle (GO:0016023);;	--	--	--	Protein kinase domain;; Protein tyrosine kinase;; D-mannose binding lectin	G-type lectin S-receptor-like serine/threonine-protein kinase RLK1 (Precursor) GN=RLK1 OS=Arabidopsis thaliana (Mouse-ear cress) PE=2 SV=2	T	Signal transduction mechanisms	putative S-receptor kinase [Oryza sativa Japonica Group]
Os06g0626200	--	--	Cellular Component: mitochondrion (GO:0005739);; Cellular Component: plastid (GO:0009536);;	--	--	--	--	--	--	--	Os06g0626200 [Oryza sativa Japonica Group]
Os09g0514900	--	--	Cellular Component: cytosol (GO:0005829);;	--	[S]	Function unknown	Transcriptional repressor TCF25	--	S	Function unknown	Os09g0514900 [Oryza sativa Japonica Group]
Os06g0527300	--	--	Molecular Function: intracellular cyclic nucleotide activated cation channel activity (GO:0005221);; Molecular Function: inward rectifier potassium channel activity (GO:0005242);; Cellular Component: plasma membrane (GO:0005886);; Biological Process: potassium ion transport (GO:0006813);; Biological Process: calcium ion transport (GO:0006816);; Biological Process: response to fungus (GO:0009620);…	--	[PT]	--	--	Cyclic nucleotide-gated ion channel 1 GN=CNGC1 OS=Arabidopsis thaliana (Mouse-ear cress) PE=1 SV=1	P	Inorganic ion transport and metabolism	Os06g0527300 [Oryza sativa Japonica Group]
Os09g0498200	--	--	Cellular Component: cytoplasmic membrane-bounded vesicle (GO:0016023);;	--	--	--	Thaumatin family;; Thaumatin family	Glucan endo-1,3-beta-glucosidase (Precursor) OS=Prunus avium (Cherry) PE=1 SV=1	R	General function prediction only	hypothetical protein OsI_31903 [Oryza sativa Indica Group]
Os09g0505200	[K]	Transcription	--	--	[K]	Transcription	FHA domain	--	K	Transcription	hypothetical protein OsI_31950 [Oryza sativa Indica Group]
Os09g0483600	--	--	Biological Process: regulation of transcription, DNA-templated (GO:0006355);;	--	[I]	Lipid transport and metabolism	Cupin-like domain	--	I	Lipid transport and metabolism	Os09g0483600 [Oryza sativa Japonica Group]
Os09g0505400	--	--	Cellular Component: mitochondrion (GO:0005739);; Cellular Component: endoplasmic reticulum (GO:0005783);; Biological Process: auxin homeostasis (GO:0010252);; Cellular Component: integral component of membrane (GO:0016021);; Biological Process: transmembrane transport (GO:0055085);; Molecular Function: auxin transmembrane transporter activity (GO:0080161);; Biological Process: intracellular auxin…	K13947|3.74717e-137|osa:4347506|Os09g0505400; K13947 auxin efflux carrier family (A)	--	--	Membrane transport protein;; Membrane transport protein	Probable auxin efflux carrier component 4 GN=OJ1770_H02.15 OS=Oryza sativa subsp. japonica (Rice) PE=2 SV=1	S	Function unknown	Os09g0505400 [Oryza sativa Japonica Group]
Os09g0505100	--	--	Molecular Function: ubiquitin thiolesterase activity (GO:0004221);; Biological Process: ubiquitin-dependent protein catabolic process (GO:0006511);; Molecular Function: cysteine-type peptidase activity (GO:0008234);; Molecular Function: zinc ion binding (GO:0008270);;	K11844|0|osa:4347503|Os09g0505100; K11844 ubiquitin carboxyl-terminal hydrolase 16/45 [EC:3.4.19.12] (A)	[O]	Posttranslational modification, protein turnover, chaperones	Ubiquitin carboxyl-terminal hydrolase;; Ubiquitin carboxyl-terminal hydrolase;; Zn-finger in ubiquitin-hydrolases and other protein	Ubiquitin carboxyl-terminal hydrolase 1 GN=UBP1 OS=Arabidopsis thaliana (Mouse-ear cress) PE=1 SV=2	O	Posttranslational modification, protein turnover, chaperones	Os09g0505100 [Oryza sativa Japonica Group]
Os09g0498000	--	--	Cellular Component: cytoplasmic membrane-bounded vesicle (GO:0016023);;	--	--	--	--	--	--	--	unnamed protein product [Oryza sativa Japonica Group]
Os06g0618150	--	--	Biological Process: N-terminal protein myristoylation (GO:0006499);; Molecular Function: protein-N-terminal asparagine amidohydrolase activity (GO:0008418);; Cellular Component: plastid (GO:0009536);; Biological Process: hormone-mediated signaling pathway (GO:0009755);;	K14662|0|dosa:Os06t0618150-00|Os06g0618150; Similar to Protein N-terminal asparagine amidohydrolase.; K14662 protein N-terminal asparagine amidohydrolase [EC:3.5.1.-] (A)	--	--	Protein N-terminal asparagine amidohydrolase	--	S	Function unknown	hypothetical protein OsI_23712 [Oryza sativa Indica Group]
Os06g0626050	[P]	Inorganic ion transport and metabolism	Cellular Component: vacuolar membrane (GO:0005774);; Molecular Function: potassium ion transmembrane transporter activity (GO:0015079);; Cellular Component: integral component of membrane (GO:0016021);; Biological Process: potassium ion transmembrane transport (GO:0071805);;	K03549|2.40773e-114|dosa:Os06t0626050-00|Os06g0626050; Similar to potassium transporter 10.; K03549 KUP system potassium uptake protein (A)	--	--	K+ potassium transporter	Potassium transporter 10 GN=OSJNBa0072A21.17 OS=Oryza sativa subsp. japonica (Rice) PE=2 SV=1	P	Inorganic ion transport and metabolism	hypothetical protein OsJ_22035 [Oryza sativa Japonica Group]
Os09g0511600	[G]	Carbohydrate transport and metabolism	Biological Process: carbohydrate metabolic process (GO:0005975);; Molecular Function: beta-glucosidase activity (GO:0008422);; Cellular Component: cytoplasmic membrane-bounded vesicle (GO:0016023);;	K01188|0|osa:4347545|Os09g0511600; K01188 beta-glucosidase [EC:3.2.1.21] (A)	[G]	Carbohydrate transport and metabolism	Glycosyl hydrolase family 1	Beta-glucosidase 31 (Precursor) GN=OsJ_29984 OS=Oryza sativa subsp. japonica (Rice) PE=2 SV=1	G	Carbohydrate transport and metabolism	Os09g0511600 [Oryza sativa Japonica Group]
Os06g0620600	[S]	Function unknown	Cellular Component: endoplasmic reticulum (GO:0005783);; Cellular Component: membrane (GO:0016020);;	--	[S]	Function unknown	YIF1	--	S	Function unknown	hypothetical protein OsJ_21998 [Oryza sativa Japonica Group]
Os09g0483800	--	--	Cellular Component: cell wall (GO:0005618);; Cellular Component: nucleus (GO:0005634);; Cellular Component: plastid (GO:0009536);; Molecular Function: pectinesterase activity (GO:0030599);; Biological Process: cell wall modification (GO:0042545);; Molecular Function: aspartyl esterase activity (GO:0045330);; Molecular Function: metal ion binding (GO:0046872);;	--	[R]	General function prediction only	C2H2-type zinc finger	Zinc finger protein ZAT7 GN=ZAT7 OS=Arabidopsis thaliana (Mouse-ear cress) PE=2 SV=1	R	General function prediction only	Os09g0483800 [Oryza sativa Japonica Group]
Os06g0623700	[G]	Carbohydrate transport and metabolism	Biological Process: biosynthetic process (GO:0009058);; Cellular Component: cytoplasmic membrane-bounded vesicle (GO:0016023);; Molecular Function: strictosidine synthase activity (GO:0016844);;	--	[R]	General function prediction only	Strictosidine synthase;; SMP-30/Gluconolaconase/LRE-like region;; NHL repeat	Protein STRICTOSIDINE SYNTHASE-LIKE 10 {ECO:0000303|PubMed:10777701} (Precursor) OS=Arabidopsis thaliana (Mouse-ear cress) PE=2 SV=1	R	General function prediction only	putative strictosidine synthase precursor [Oryza sativa Japonica Group]
Os09g0495200	--	--	Cellular Component: mitochondrion (GO:0005739);; Cellular Component: plastid (GO:0009536);;	--	--	--	--	--	S	Function unknown	hypothetical protein OsJ_29875 [Oryza sativa Japonica Group]
Os09g0494800	--	--	Cellular Component: mitochondrion (GO:0005739);; Cellular Component: plastid (GO:0009536);;	--	--	--	--	--	S	Function unknown	hypothetical protein F775_24462 [Aegilops tauschii]
Os09g0487100	--	--	--	--	--	--	--	--	--	--	Os09g0487100 [Oryza sativa Japonica Group]
Os06g0524300	--	--	--	--	--	--	Protein of unknown function (DUF3133)	Extra-large guanine nucleotide-binding protein 1 GN=F26B6.11 OS=Arabidopsis thaliana (Mouse-ear cress) PE=1 SV=2	S	Function unknown	Os06g0524300 [Oryza sativa Japonica Group]
Os09g0509300	--	--	Cellular Component: extracellular region (GO:0005576);; Cellular Component: mitochondrion (GO:0005739);; Cellular Component: primary cell wall (GO:0009530);;	--	--	--	BAR domain	Uncharacterized protein At2g33490 GN=At2g33490 OS=Arabidopsis thaliana (Mouse-ear cress) PE=4 SV=2	S	Function unknown	Os09g0509300 [Oryza sativa Japonica Group]
Os09g0501825	--	--	--	--	[J]	Translation, ribosomal structure and biogenesis	--	60S ribosomal protein L32 (Fragment) GN=RPL32 OS=Zea mays (Maize) PE=2 SV=1	J	Translation, ribosomal structure and biogenesis	PREDICTED: 60S ribosomal protein L32-1-like [Oryza brachyantha]
Os06g0626700	[R]	General function prediction only	Molecular Function: iron ion binding (GO:0005506);; Biological Process: proteolysis (GO:0006508);; Biological Process: vacuole organization (GO:0007033);; Molecular Function: metallopeptidase activity (GO:0008237);; Biological Process: response to wounding (GO:0009611);; Biological Process: response to jasmonic acid (GO:0009753);; Biological Process: flavonoid biosynthetic process (GO:0009813);; …	K05277|0|osa:4341576|Os06g0626700; K05277 leucoanthocyanidin dioxygenase [EC:1.14.11.19] (A)	[QR]	--	non-haem dioxygenase in morphine synthesis N-terminal;; 2OG-Fe(II) oxygenase superfamily	Leucoanthocyanidin dioxygenase GN=A2 OS=Zea mays (Maize) PE=2 SV=1	H	Coenzyme transport and metabolism	Os06g0626700 [Oryza sativa Japonica Group]
Os09g0482740	--	--	--	--	--	--	Protein of unknown function (DUF1664)	--	S	Function unknown	Os09g0482740 [Oryza sativa Japonica Group]
Os09g0486000	--	--	--	--	[U]	Intracellular trafficking, secretion, and vesicular transport	PRELI-like family	--	U	Intracellular trafficking, secretion, and vesicular transport	hypothetical protein OsI_31832 [Oryza sativa Indica Group]
Os09g0501650	--	--	Molecular Function: protein dimerization activity (GO:0046983);;	--	--	--	--	--	K	Transcription	Os09g0501600 [Oryza sativa Japonica Group]
Os09g0507300	[Q]	Secondary metabolites biosynthesis, transport and catabolism	Molecular Function: copper ion binding (GO:0005507);; Cellular Component: extracellular region (GO:0005576);; Molecular Function: oxidoreductase activity (GO:0016491);; Biological Process: oxidation-reduction process (GO:0055114);;	--	[Q]	Secondary metabolites biosynthesis, transport and catabolism	Multicopper oxidase;; Multicopper oxidase;; Multicopper oxidase	L-ascorbate oxidase (Precursor) OS=Cucumis sativus (Cucumber) PE=1 SV=1	Q	Secondary metabolites biosynthesis, transport and catabolism	Os09g0507300 [Oryza sativa Japonica Group]
Os06g0627100	--	--	--	--	--	--	--	--	--	--	Os06g0627101 [Oryza sativa Japonica Group]
Os06g0577350	--	--	Biological Process: defense response (GO:0006952);; Molecular Function: ADP binding (GO:0043531);;	--	--	--	--	--	T	Signal transduction mechanisms	hypothetical protein OsJ_21782 [Oryza sativa Japonica Group]
Os06g0529900	--	--	--	--	--	--	--	--	S	Function unknown	hypothetical protein OsI_23225 [Oryza sativa Indica Group]
Os06g0529800	--	--	Molecular Function: ubiquitin-protein transferase activity (GO:0004842);; Cellular Component: cytoplasm (GO:0005737);; Biological Process: DNA-dependent DNA replication (GO:0006261);; Molecular Function: zinc ion binding (GO:0008270);; Biological Process: protein ubiquitination (GO:0016567);;	K11979|0|osa:4341197|Os06g0529800; K11979 E3 ubiquitin-protein ligase UBR7 [EC:6.3.2.19] (A)	[R]	General function prediction only	Putative zinc finger in N-recognin (UBR box)	--	R	General function prediction only	Os06g0529800 [Oryza sativa Japonica Group]
Os06g0574100	[M]	Cell wall/membrane/envelope biogenesis	Cellular Component: mitochondrion (GO:0005739);; Cellular Component: plasma membrane (GO:0005886);; Molecular Function: methyltransferase activity (GO:0008168);; Biological Process: lipid biosynthetic process (GO:0008610);; Biological Process: methylation (GO:0032259);;	--	--	--	--	(S)-coclaurine N-methyltransferase OS=Thalictrum flavum subsp. glaucum (Yellow meadow rue) PE=1 SV=1	M	Cell wall/membrane/envelope biogenesis	hypothetical protein OsI_23454 [Oryza sativa Indica Group]
Os09g0474300	--	--	Molecular Function: ATP binding (GO:0005524);; Cellular Component: mitochondrion (GO:0005739);; Cellular Component: vacuolar membrane (GO:0005774);; Cellular Component: plasma membrane (GO:0005886);; Biological Process: protein folding (GO:0006457);; Biological Process: response to heat (GO:0009408);; Biological Process: response to water deprivation (GO:0009414);; Cellular Component: chloroplast…	K09487|0|osa:4347356|Os09g0474300; K09487 heat shock protein 90kDa beta (A)	[O]	Posttranslational modification, protein turnover, chaperones	Hsp90 protein;; Histidine kinase-, DNA gyrase B-, and HSP90-like ATPase;; Histidine kinase-, DNA gyrase B-, and HSP90-like ATPase	Heat shock protein 83 GN=HSP83A OS=Ipomoea nil (Japanese morning glory) PE=2 SV=1	O	Posttranslational modification, protein turnover, chaperones	Os09g0474300 [Oryza sativa Japonica Group]
Os09g0506900	--	--	Biological Process: embryo development ending in seed dormancy (GO:0009793);; Biological Process: endosperm development (GO:0009960);;	--	--	--	Coiled coil protein 84	TITAN-like protein GN=TTL OS=Arabidopsis thaliana (Mouse-ear cress) PE=2 SV=1	S	Function unknown	unnamed protein product [Oryza sativa Japonica Group]
Os09g0491692	--	--	--	--	--	--	--	--	S	Function unknown	Os09g0491692 [Oryza sativa Japonica Group]
Os09g0513800	--	--	Molecular Function: nucleic acid binding (GO:0003676);; Cellular Component: mitochondrion (GO:0005739);; Molecular Function: zinc ion binding (GO:0008270);;	K11968|0|osa:4347561|Os09g0513800; K11968 ariadne-1 (A)	[O]	Posttranslational modification, protein turnover, chaperones	IBR domain	Probable E3 ubiquitin-protein ligase ARI8 GN=ARI8 OS=Arabidopsis thaliana (Mouse-ear cress) PE=2 SV=1	R	General function prediction only	Os09g0513800 [Oryza sativa Japonica Group]
Os06g0622500	[R]	General function prediction only	Cellular Component: anaphase-promoting complex (GO:0005680);; Cellular Component: spindle (GO:0005819);; Biological Process: gamete generation (GO:0007276);; Cellular Component: cell plate (GO:0009504);; Biological Process: response to auxin (GO:0009733);; Biological Process: root meristem specification (GO:0010071);; Biological Process: cell differentiation (GO:0030154);; Biological Process: roo…	K03350|0|dosa:Os06t0622500-00|Os06g0622500; Similar to predicted protein.; K03350 anaphase-promoting complex subunit 3 (A)	[D]	Cell cycle control, cell division, chromosome partitioning	TPR repeat;; Tetratricopeptide repeat;; Tetratricopeptide repeat;; Tetratricopeptide repeat;; Tetratricopeptide repeat;; Tetratricopeptide repeat;; Tetratricopeptide repeat;; Tetratricopeptide repeat;; Tetratricopeptide repeat;; Anaphase-promoting complex, cyclosome, subunit 3;; Tetratricopeptide repeat;; Tetratricopeptide repeat	Cell division cycle protein 27 homolog B GN=T2G17.20 OS=Arabidopsis thaliana (Mouse-ear cress) PE=1 SV=1	D	Cell cycle control, cell division, chromosome partitioning	putative HOBBIT [Oryza sativa Japonica Group]
Os06g0621100	--	--	Molecular Function: protein serine/threonine kinase activity (GO:0004674);; Molecular Function: ATP binding (GO:0005524);; Biological Process: protein phosphorylation (GO:0006468);; Biological Process: signal transduction (GO:0007165);; Biological Process: multicellular organismal development (GO:0007275);; Biological Process: response to water deprivation (GO:0009414);; Biological Process: basip…	--	[T]	Signal transduction mechanisms	NAF domain	Putative CBL-interacting protein kinase 27 GN=P0701F11.10 OS=Oryza sativa subsp. japonica (Rice) PE=3 SV=1	T	Signal transduction mechanisms	hypothetical protein OsJ_22000 [Oryza sativa Japonica Group]
Os09g0496250	--	--	Cellular Component: plastid (GO:0009536);;	--	--	--	--	--	S	Function unknown	hypothetical protein OsJ_29878 [Oryza sativa Japonica Group]
Os09g0513700	[R]	General function prediction only	Molecular Function: nucleotide binding (GO:0000166);; Biological Process: mRNA splicing, via spliceosome (GO:0000398);; Molecular Function: RNA binding (GO:0003723);; Cellular Component: nucleus (GO:0005634);; Biological Process: positive regulation of cell proliferation (GO:0008284);; Cellular Component: ribonucleoprotein complex (GO:0030529);; Biological Process: photoperiodism, flowering (GO:0…	K13155|0|osa:4347560|Os09g0513700; K13155 U11/U12 small nuclear ribonucleoprotein 35 kDa protein (A)	[A]	RNA processing and modification	RNA recognition motif. (a.k.a. RRM, RBD, or RNP domain);; RNA recognition motif (a.k.a. RRM, RBD, or RNP domain);; RNA recognition motif. (a.k.a. RRM, RBD, or RNP domain)	U11/U12 small nuclear ribonucleoprotein 35 kDa protein GN=SNRNP35 OS=Arabidopsis thaliana (Mouse-ear cress) PE=1 SV=1	A	RNA processing and modification	Os09g0513700 [Oryza sativa Japonica Group]
Os09g0493200	--	--	--	--	--	--	--	--	S	Function unknown	hypothetical protein OsI_31878 [Oryza sativa Indica Group]
Os09g0493000	--	--	Cellular Component: plastid (GO:0009536);;	--	--	--	Domain of unknown function (DUF4228)	--	S	Function unknown	hypothetical protein OsI_31877 [Oryza sativa Indica Group]
Os09g0502200	--	--	Molecular Function: hydrolase activity, hydrolyzing O-glycosyl compounds (GO:0004553);; Biological Process: carbohydrate metabolic process (GO:0005975);; Cellular Component: plant-type cell wall (GO:0009505);; Biological Process: embryo development ending in seed dormancy (GO:0009793);; Biological Process: pollen exine formation (GO:0010584);; Cellular Component: cytoplasmic membrane-bounded vesi…	--	--	--	Glycosyl hydrolases family 17;; X8 domain	Probable glucan endo-1,3-beta-glucosidase A6 (Precursor) GN=A6 OS=Arabidopsis thaliana (Mouse-ear cress) PE=2 SV=1	R	General function prediction only	Os09g0502200 [Oryza sativa Japonica Group]
Os09g0491676	--	--	--	--	--	--	--	--	S	Function unknown	Os09g0491676 [Oryza sativa Japonica Group]
Os09g0498500	[E]	Amino acid transport and metabolism	Cellular Component: mitochondrion (GO:0005739);; Molecular Function: oxidoreductase activity (GO:0016491);; Biological Process: oxidation-reduction process (GO:0055114);;	K00306|0|dosa:Os09t0498500-00|Os09g0498500; NAD-binding site containing protein.; K00306 sarcosine oxidase / L-pipecolate oxidase [EC:1.5.3.1 1.5.3.7] (A)	[R]	General function prediction only	FAD dependent oxidoreductase;; HI0933-like protein;; NAD(P)-binding Rossmann-like domain;; Pyridine nucleotide-disulphide oxidoreductase;; Glucose inhibited division protein A	Probable sarcosine oxidase GN=At2g24580 OS=Arabidopsis thaliana (Mouse-ear cress) PE=2 SV=1	R	General function prediction only	hypothetical protein OsI_31904 [Oryza sativa Indica Group]
Os09g0505300	--	--	Molecular Function: oleoyl-[acyl-carrier-protein] hydrolase activity (GO:0004320);; Cellular Component: mitochondrion (GO:0005739);; Biological Process: fatty acid biosynthetic process (GO:0006633);; Molecular Function: myristoyl-[acyl-carrier-protein] hydrolase activity (GO:0016295);; Molecular Function: palmitoyl-[acyl-carrier-protein] hydrolase activity (GO:0016296);;	K10782|0|osa:4347505|Os09g0505300; K10782 fatty acyl-ACP thioesterase A [EC:3.1.2.14] (A)	--	--	Acyl-ACP thioesterase	Oleoyl-acyl carrier protein thioesterase 1, chloroplastic (Precursor) GN=MJL12.5 OS=Arabidopsis thaliana (Mouse-ear cress) PE=1 SV=1	I	Lipid transport and metabolism	hypothetical protein OsI_31951 [Oryza sativa Indica Group]
Os09g0499000	--	--	--	--	--	--	--	--	S	Function unknown	Os09g0499000 [Oryza sativa Japonica Group]
Os06g0525200	--	--	--	--	--	--	--	--	S	Function unknown	Os06g0525200 [Oryza sativa Japonica Group]
Os09g0506450	--	--	Cellular Component: mitochondrion (GO:0005739);; Cellular Component: cytoplasmic membrane-bounded vesicle (GO:0016023);;	--	--	--	--	--	R	General function prediction only	hypothetical protein OsI_31959 [Oryza sativa Indica Group]
Os09g0481800	[O]	Posttranslational modification, protein turnover, chaperones	Molecular Function: iron ion binding (GO:0005506);; Biological Process: pentose-phosphate shunt (GO:0006098);; Biological Process: aromatic amino acid family biosynthetic process (GO:0009073);; Cellular Component: chloroplast stroma (GO:0009570);; Biological Process: iron-sulfur cluster assembly (GO:0016226);; Biological Process: positive regulation of transcription, DNA-templated (GO:0045893);; …	--	--	--	--	--	S	Function unknown	Os09g0481800 [Oryza sativa Japonica Group]
Os09g0501700	[J]	Translation, ribosomal structure and biogenesis	Molecular Function: structural constituent of ribosome (GO:0003735);; Cellular Component: nucleolus (GO:0005730);; Cellular Component: mitochondrion (GO:0005739);; Biological Process: translation (GO:0006412);; Cellular Component: plastid (GO:0009536);; Cellular Component: cytosolic large ribosomal subunit (GO:0022625);;	K02912|2.75302e-96|dosa:Os09t0501700-00|Os09g0501700; Ribosomal protein L32e family protein.; K02912 large subunit ribosomal protein L32e (A)	[J]	Translation, ribosomal structure and biogenesis	Ribosomal protein L32	60S ribosomal protein L32-1 GN=RPL32A OS=Arabidopsis thaliana (Mouse-ear cress) PE=2 SV=2	J	Translation, ribosomal structure and biogenesis	hypothetical protein OsJ_29906 [Oryza sativa Japonica Group]
Os09g0503850	[MG]	--	Cellular Component: mitochondrion (GO:0005739);; Biological Process: carbohydrate metabolic process (GO:0005975);; Molecular Function: racemase and epimerase activity, acting on carbohydrates and derivatives (GO:0016857);; Biological Process: cellular metabolic process (GO:0044237);; Molecular Function: coenzyme binding (GO:0050662);;	--	[M]	Cell wall/membrane/envelope biogenesis	NAD dependent epimerase/dehydratase family;; RmlD substrate binding domain;; Male sterility protein	UDP-glucuronate 4-epimerase 6 GN=F14O13.1 OS=Arabidopsis thaliana (Mouse-ear cress) PE=1 SV=1	G	Carbohydrate transport and metabolism	hypothetical protein OsI_31939 [Oryza sativa Indica Group]
Os09g0500151	--	--	Cellular Component: plastid (GO:0009536);;	--	--	--	--	--	--	--	hypothetical protein OsJ_29899 [Oryza sativa Japonica Group]
Os09g0486500	--	--	Molecular Function: DNA binding (GO:0003677);; Biological Process: response to stress (GO:0006950);; Molecular Function: zinc ion binding (GO:0008270);; Biological Process: primary metabolic process (GO:0044238);; Biological Process: organic substance metabolic process (GO:0071704);;	--	[R]	General function prediction only	AN1-like Zinc finger;; A20-like zinc finger	Zinc finger A20 and AN1 domain-containing stress-associated protein 1 OS=Oryza sativa subsp. japonica (Rice) PE=2 SV=2	R	General function prediction only	hypothetical protein OsJ_29820 [Oryza sativa Japonica Group]
Os09g0507100	--	--	Molecular Function: DNA binding (GO:0003677);; Cellular Component: nucleus (GO:0005634);; Biological Process: regulation of transcription, DNA-templated (GO:0006355);; Molecular Function: metal ion binding (GO:0046872);;	--	--	--	SBP domain	Squamosa promoter-binding-like protein 18 GN=SPL18 OS=Oryza sativa subsp. japonica (Rice) PE=2 SV=1	K	Transcription	Os09g0507100 [Oryza sativa Japonica Group]
Os06g0528700	[P]	Inorganic ion transport and metabolism	Molecular Function: N,N-dimethylaniline monooxygenase activity (GO:0004499);; Cellular Component: cytoplasmic membrane-bounded vesicle (GO:0016023);; Molecular Function: hydrolase activity (GO:0016787);; Biological Process: electron transport chain (GO:0022900);; Molecular Function: flavin adenine dinucleotide binding (GO:0050660);; Molecular Function: NADP binding (GO:0050661);;	--	[Q]	Secondary metabolites biosynthesis, transport and catabolism	Flavin-binding monooxygenase-like;; Pyridine nucleotide-disulphide oxidoreductase;; FAD dependent oxidoreductase;; FAD-NAD(P)-binding;; Pyridine nucleotide-disulphide oxidoreductase;; L-lysine 6-monooxygenase (NADPH-requiring);; Flavin containing amine oxidoreductase;; NAD(P)-binding Rossmann-like domain;; Pyridine nucleotide-disulphide oxidoreductase;; FAD dependent oxidoreductase;; FAD binding …	Flavin-containing monooxygenase FMO GS-OX-like 9 GN=At5g07800 OS=Arabidopsis thaliana (Mouse-ear cress) PE=2 SV=1	P	Inorganic ion transport and metabolism	Os06g0528700 [Oryza sativa Japonica Group]
Os09g0509350	--	--	--	--	--	--	--	--	S	Function unknown	Os09g0509300 [Oryza sativa Japonica Group]
Os06g0567000	--	--	Cellular Component: cytoplasmic membrane-bounded vesicle (GO:0016023);;	--	[S]	Function unknown	Uncharacterised protein family (UPF0197)	--	S	Function unknown	Os06g0567000 [Oryza sativa Japonica Group]
Os06g0521300	--	--	Cellular Component: plastid (GO:0009536);;	--	--	--	Late embryogenesis abundant protein	--	S	Function unknown	hypothetical protein OsI_23182 [Oryza sativa Indica Group]
Os09g0491822	[MG]	--	Molecular Function: catalytic activity (GO:0003824);; Biological Process: cellular metabolic process (GO:0044237);; Biological Process: response to cadmium ion (GO:0046686);; Molecular Function: coenzyme binding (GO:0050662);;	--	[V]	Defense mechanisms	NAD dependent epimerase/dehydratase family;; 3-beta hydroxysteroid dehydrogenase/isomerase family;; Male sterility protein;; NADH(P)-binding	Cinnamoyl-CoA reductase 2 GN=CCR2 OS=Arabidopsis thaliana (Mouse-ear cress) PE=1 SV=1	Q	Secondary metabolites biosynthesis, transport and catabolism	hypothetical protein OsI_31867 [Oryza sativa Indica Group]
Os06g0575400	[RTKL]	--	Molecular Function: protein serine/threonine kinase activity (GO:0004674);; Molecular Function: ATP binding (GO:0005524);; Biological Process: protein phosphorylation (GO:0006468);; Cellular Component: cytoplasmic membrane-bounded vesicle (GO:0016023);; Biological Process: recognition of pollen (GO:0048544);;	--	--	--	Protein kinase domain;; Protein tyrosine kinase;; D-mannose binding lectin;; S-locus glycoprotein family;; PAN domain;; Protein-kinase domain of FAM69;; PAN domain;; PAN-like domain	Putative receptor protein kinase ZmPK1 (Precursor) GN=PK1 OS=Zea mays (Maize) PE=2 SV=2	T	Signal transduction mechanisms	Os06g0575400 [Oryza sativa Japonica Group]
Os09g0513400	--	--	--	--	--	--	--	--	--	--	Os09g0513400 [Oryza sativa Japonica Group]
Os09g0491532	--	--	Molecular Function: DNA binding (GO:0003677);; Cellular Component: nucleus (GO:0005634);; Biological Process: regulation of transcription, DNA-templated (GO:0006355);; Molecular Function: metal ion binding (GO:0046872);;	--	--	--	SBP domain	Squamosa promoter-binding-like protein 17 GN=OsJ_028679 OS=Oryza sativa subsp. japonica (Rice) PE=2 SV=2	K	Transcription	Os09g0491532 [Oryza sativa Japonica Group]
Os09g0501150	[J]	Translation, ribosomal structure and biogenesis	Molecular Function: structural constituent of ribosome (GO:0003735);; Cellular Component: nucleolus (GO:0005730);; Cellular Component: mitochondrion (GO:0005739);; Biological Process: translation (GO:0006412);; Cellular Component: cytosolic large ribosomal subunit (GO:0022625);;	--	[J]	Translation, ribosomal structure and biogenesis	Ribosomal protein L32	60S ribosomal protein L32-1 GN=RPL32A OS=Arabidopsis thaliana (Mouse-ear cress) PE=2 SV=2	J	Translation, ribosomal structure and biogenesis	Os09g0501100 [Oryza sativa Japonica Group]
Os06g0579100	--	--	Cellular Component: membrane (GO:0016020);;	--	--	--	--	--	--	--	Os06g0579100 [Oryza sativa Japonica Group]
Os09g0499600	--	--	Molecular Function: DNA binding (GO:0003677);; Molecular Function: protein dimerization activity (GO:0046983);;	--	--	--	Protein of unknown function (DUF 659);; BED zinc finger;; hAT family C-terminal dimerisation region	--	S	Function unknown	Os09g0499600 [Oryza sativa Japonica Group]
Os06g0619000	--	--	Biological Process: defense response (GO:0006952);; Molecular Function: ADP binding (GO:0043531);;	--	[T]	Signal transduction mechanisms	NB-ARC domain;; Leucine rich repeat;; Leucine Rich repeats (2 copies);; AAA ATPase domain;; Leucine rich repeat	Putative disease resistance protein RGA3 GN=RGA3 OS=Solanum bulbocastanum (Wild potato) PE=2 SV=2	T	Signal transduction mechanisms	Os06g0619000 [Oryza sativa Japonica Group]
Os06g0526466	--	--	--	--	--	--	--	Abscisic acid receptor PYL9 GN=F6F3.16 OS=Arabidopsis thaliana (Mouse-ear cress) PE=1 SV=1	R	General function prediction only	Os06g0526466 [Oryza sativa Japonica Group]
Os09g0482000	--	--	Cellular Component: plastid (GO:0009536);;	--	[T]	Signal transduction mechanisms	UBX domain	--	O	Posttranslational modification, protein turnover, chaperones	Os09g0482000 [Oryza sativa Japonica Group]
Os09g0487900	--	--	Molecular Function: protein dimerization activity (GO:0046983);;	--	--	--	Helix-loop-helix DNA-binding domain	Transcription factor bHLH130 GN=T24P15.19 OS=Arabidopsis thaliana (Mouse-ear cress) PE=1 SV=1	K	Transcription	Os09g0487900 [Oryza sativa Japonica Group]
Os06g0618300	--	--	Cellular Component: mitochondrion (GO:0005739);; Biological Process: pyrimidine ribonucleotide biosynthetic process (GO:0009220);;	--	--	--	--	--	S	Function unknown	hypothetical protein OsI_23713 [Oryza sativa Indica Group]
Os09g0487700	--	--	Cellular Component: mitochondrion (GO:0005739);;	--	[TO]	--	OTU-like cysteine protease	OTU domain-containing protein At3g57810 GN=At3g57810 OS=Arabidopsis thaliana (Mouse-ear cress) PE=2 SV=1	OT	--	hypothetical protein OsJ_29825 [Oryza sativa Japonica Group]
Os09g0474501	--	--	Cellular Component: membrane (GO:0016020);; Biological Process: single-organism transport (GO:0044765);;	--	[P]	Inorganic ion transport and metabolism	--	Cation/H(+) antiporter 24 GN=CHX24 OS=Arabidopsis thaliana (Mouse-ear cress) PE=2 SV=2	P	Inorganic ion transport and metabolism	hypothetical protein OsJ_29734 [Oryza sativa Japonica Group]
Os06g0626766	--	--	Cellular Component: plastid (GO:0009536);;	--	--	--	--	--	--	--	hypothetical protein [Oryza sativa Japonica Group]
Os09g0497900	--	--	Molecular Function: DNA binding (GO:0003677);; Molecular Function: sequence-specific DNA binding transcription factor activity (GO:0003700);; Biological Process: regulation of transcription, DNA-templated (GO:0006355);; Biological Process: multicellular organismal development (GO:0007275);;	--	--	--	No apical meristem (NAM) protein	Protein CUP-SHAPED COTYLEDON 2 GN=K19P17.12 OS=Arabidopsis thaliana (Mouse-ear cress) PE=1 SV=1	S	Function unknown	Os09g0497900 [Oryza sativa Japonica Group]
Os06g0620700	--	--	Cellular Component: mitochondrion (GO:0005739);;	--	--	--	--	--	--	--	hypothetical protein OsI_23726 [Oryza sativa Indica Group]
Os09g0516500	[MG]	--	Molecular Function: nucleotide binding (GO:0000166);; Molecular Function: 3-beta-hydroxy-delta5-steroid dehydrogenase activity (GO:0003854);; Molecular Function: hydroxyacylglutathione hydrolase activity (GO:0004416);; Cellular Component: endoplasmic reticulum (GO:0005783);; Cellular Component: plasma membrane (GO:0005886);; Biological Process: steroid biosynthetic process (GO:0006694);; Biologic…	K07748|0|dosa:Os09t0516500-00|Os09g0516500; NAD(P)-binding domain containing protein.; K07748 sterol-4alpha-carboxylate 3-dehydrogenase (decarboxylating) [EC:1.1.1.170] (A)	[IE]	--	3-beta hydroxysteroid dehydrogenase/isomerase family;; Reticulon;; NAD dependent epimerase/dehydratase family;; NADH(P)-binding;; Male sterility protein	3beta-hydroxysteroid-dehydrogenase/decarboxylase isoform 2 GN=T1D16.10 OS=Arabidopsis thaliana (Mouse-ear cress) PE=2 SV=2	EI	--	3-beta-hydroxysteroid dehydrogenase-like [Oryza sativa Japonica Group]
Os06g0571800	--	--	Molecular Function: sequence-specific DNA binding transcription factor activity (GO:0003700);; Biological Process: regulation of transcription, DNA-templated (GO:0006355);; Molecular Function: zinc ion binding (GO:0008270);; Molecular Function: sequence-specific DNA binding (GO:0043565);;	--	[K]	Transcription	GATA zinc finger	GATA transcription factor 21 GN=MPI10.2 OS=Arabidopsis thaliana (Mouse-ear cress) PE=1 SV=2	K	Transcription	Os06g0571800 [Oryza sativa Japonica Group]
Os06g0575100	--	--	--	--	--	--	--	--	S	Function unknown	hypothetical protein OsJ_21776 [Oryza sativa Japonica Group]
Os06g0622700	--	--	Biological Process: MAPK cascade (GO:0000165);; Biological Process: respiratory burst involved in defense response (GO:0002679);; Molecular Function: sequence-specific DNA binding transcription factor activity (GO:0003700);; Cellular Component: endoplasmic reticulum membrane (GO:0005789);; Biological Process: regulation of transcription, DNA-templated (GO:0006355);; Biological Process: protein ta…	--	--	--	bZIP transcription factor;; Basic region leucine zipper	bZIP transcription factor 60 GN=BZIP60 OS=Arabidopsis thaliana (Mouse-ear cress) PE=2 SV=1	K	Transcription	Os06g0622700 [Oryza sativa Japonica Group]
Os09g0493600	[S]	Function unknown	Biological Process: phosphatidylglycerol biosynthetic process (GO:0006655);; Biological Process: aromatic amino acid family biosynthetic process (GO:0009073);; Cellular Component: chloroplast (GO:0009507);; Biological Process: stomatal complex morphogenesis (GO:0010103);; Biological Process: iron-sulfur cluster assembly (GO:0016226);; Biological Process: isopentenyl diphosphate biosynthetic proce…	--	--	--	Oligomerisation domain	Protein Iojap, chloroplast (Precursor) GN=Ij OS=Zea mays (Maize) PE=1 SV=1	S	Function unknown	Os09g0493600 [Oryza sativa Japonica Group]
Os09g0491652	--	--	Molecular Function: DNA binding (GO:0003677);; Molecular Function: chromatin binding (GO:0003682);;	--	--	--	Myb-like DNA-binding domain	--	K	Transcription	Os09g0491660 [Oryza sativa Japonica Group]
Os09g0495000	--	--	Cellular Component: mitochondrion (GO:0005739);; Cellular Component: plastid (GO:0009536);;	--	--	--	--	--	S	Function unknown	hypothetical protein OsJ_29874 [Oryza sativa Japonica Group]
Os06g0568600	[Q]	Secondary metabolites biosynthesis, transport and catabolism	Molecular Function: monooxygenase activity (GO:0004497);; Molecular Function: iron ion binding (GO:0005506);; Cellular Component: endoplasmic reticulum (GO:0005783);; Molecular Function: electron carrier activity (GO:0009055);; Biological Process: gibberellin biosynthetic process (GO:0009686);; Cellular Component: chloroplast outer membrane (GO:0009707);; Biological Process: ent-kaurene oxidation…	--	[Q]	Secondary metabolites biosynthesis, transport and catabolism	Cytochrome P450	Ent-kaurene oxidase-like 5 {ECO:0000303|PubMed:15316288} OS=Oryza sativa subsp. japonica (Rice) PE=2 SV=1	Q	Secondary metabolites biosynthesis, transport and catabolism	Os06g0568600 [Oryza sativa Japonica Group]
Os09g0505700	[G]	Carbohydrate transport and metabolism	Molecular Function: ribulose-phosphate 3-epimerase activity (GO:0004750);; Cellular Component: cytoplasm (GO:0005737);; Cellular Component: plasma membrane (GO:0005886);; Biological Process: pentose-phosphate shunt (GO:0006098);; Molecular Function: metal ion binding (GO:0046872);;	K01783|2.17571e-162|osa:4347508|Os09g0505700; K01783 ribulose-phosphate 3-epimerase [EC:5.1.3.1] (A)	[G]	Carbohydrate transport and metabolism	Ribulose-phosphate 3 epimerase family	Ribulose-phosphate 3-epimerase, cytoplasmic isoform OS=Oryza sativa subsp. japonica (Rice) PE=1 SV=1	G	Carbohydrate transport and metabolism	Os09g0505700 [Oryza sativa Japonica Group]
Os06g0521500	--	--	Molecular Function: peroxidase activity (GO:0004601);; Biological Process: response to oxidative stress (GO:0006979);; Cellular Component: cytoplasmic membrane-bounded vesicle (GO:0016023);; Molecular Function: heme binding (GO:0020037);; Molecular Function: metal ion binding (GO:0046872);; Biological Process: oxidation-reduction process (GO:0055114);;	--	--	--	Peroxidase	Peroxidase 2 (Precursor) OS=Oryza sativa subsp. japonica (Rice) PE=2 SV=1	--	--	Os06g0521500 [Oryza sativa Japonica Group]
Os09g0524001	[V]	Defense mechanisms	Cellular Component: mitochondrion (GO:0005739);; Biological Process: drug transmembrane transport (GO:0006855);; Molecular Function: drug transmembrane transporter activity (GO:0015238);; Molecular Function: antiporter activity (GO:0015297);; Cellular Component: membrane (GO:0016020);;	--	[R]	General function prediction only	MatE	MATE efflux family protein 5 GN=F3L12.12 OS=Arabidopsis thaliana (Mouse-ear cress) PE=3 SV=1	S	Function unknown	Os09g0524300 [Oryza sativa Japonica Group]
Os09g0509700	--	--	--	--	--	--	CCT motif	Zinc finger protein CONSTANS-LIKE 14 GN=COL14 OS=Arabidopsis thaliana (Mouse-ear cress) PE=2 SV=2	R	General function prediction only	hypothetical protein OsJ_29967 [Oryza sativa Japonica Group]
Os09g0514200	[RTKL]	--	Molecular Function: protein serine/threonine kinase activity (GO:0004674);; Molecular Function: calcium ion binding (GO:0005509);; Molecular Function: ATP binding (GO:0005524);; Cellular Component: mitochondrion (GO:0005739);; Biological Process: protein phosphorylation (GO:0006468);;	K13412|0|osa:4347564|Os09g0514200; K13412 calcium-dependent protein kinase [EC:2.7.11.1] (A)	[T]	Signal transduction mechanisms	Protein kinase domain;; EF-hand domain pair;; EF hand;; Protein tyrosine kinase;; EF-hand domain;; EF-hand domain pair;; EF hand;; Phosphotransferase enzyme family;; Cytoskeletal-regulatory complex EF hand;; Secreted protein acidic and rich in cysteine Ca binding region	Calcium-dependent protein kinase 32 GN=CPK32 OS=Arabidopsis thaliana (Mouse-ear cress) PE=1 SV=1	T	Signal transduction mechanisms	Os09g0514200 [Oryza sativa Japonica Group]
Os09g0507701	--	--	Cellular Component: endoplasmic reticulum membrane (GO:0005789);; Cellular Component: Golgi apparatus (GO:0005794);; Biological Process: intracellular protein transport (GO:0006886);; Molecular Function: protein transmembrane transporter activity (GO:0008320);; Cellular Component: integral component of membrane (GO:0016021);; Cellular Component: ER to Golgi transport vesicle (GO:0030134);; Biolog…	--	[U]	Intracellular trafficking, secretion, and vesicular transport	emp24/gp25L/p24 family/GOLD	Transmembrane emp24 domain-containing protein p24beta2 (Precursor) GN=At3g07680 OS=Arabidopsis thaliana (Mouse-ear cress) PE=1 SV=1	U	Intracellular trafficking, secretion, and vesicular transport	hypothetical protein OsI_31972 [Oryza sativa Indica Group]
Os06g0575500	--	--	Molecular Function: DNA binding (GO:0003677);; Cellular Component: plastid (GO:0009536);; Cellular Component: cytoplasmic membrane-bounded vesicle (GO:0016023);; Molecular Function: protein dimerization activity (GO:0046983);;	--	[L]	Replication, recombination and repair	BED zinc finger	Zinc finger BED domain-containing protein RICESLEEPER 2 OS=Oryza sativa subsp. japonica (Rice) PE=2 SV=1	S	Function unknown	OSJNBa0049H08.1 [Oryza sativa Japonica Group]
Os09g0514350	--	--	Cellular Component: plastid (GO:0009536);;	--	[R]	General function prediction only	--	--	R	General function prediction only	Os09g0514300 [Oryza sativa Japonica Group]
Os06g0621600	--	--	Biological Process: defense response (GO:0006952);; Molecular Function: ADP binding (GO:0043531);;	--	--	--	--	--	T	Signal transduction mechanisms	hypothetical protein OsI_23732 [Oryza sativa Indica Group]
Os09g0504900	--	--	--	--	--	--	Domain of unknown function (DUF4477)	--	S	Function unknown	Os09g0504900 [Oryza sativa Japonica Group]
Os09g0502950	[CR]	--	Cellular Component: vacuole (GO:0005773);; Cellular Component: plasma membrane (GO:0005886);; Molecular Function: zinc ion binding (GO:0008270);; Cellular Component: chloroplast thylakoid membrane (GO:0009535);; Molecular Function: oxidoreductase activity (GO:0016491);; Biological Process: oxidation-reduction process (GO:0055114);;	--	[CR]	--	Zinc-binding dehydrogenase	Quinone-oxidoreductase homolog, chloroplastic GN=QOR OS=Spinacia oleracea (Spinach) PE=1 SV=1	C	Energy production and conversion	hypothetical protein OsI_31935 [Oryza sativa Indica Group]
Os09g0511000	[RTKL]	--	Biological Process: respiratory burst involved in defense response (GO:0002679);; Biological Process: cell surface pattern recognition receptor signaling pathway (GO:0002752);; Molecular Function: protein serine/threonine kinase activity (GO:0004674);; Molecular Function: ATP binding (GO:0005524);; Cellular Component: plasma membrane (GO:0005886);; Biological Process: protein targeting to membran…	K13429|1.95186e-173|sita:101782219|chitin elicitor receptor kinase 1-like; K13429 chitin elicitor receptor kinase 1 (A)	--	--	Protein tyrosine kinase;; Protein kinase domain	Chitin elicitor receptor kinase 1 (Precursor) GN=CERK1 OS=Oryza sativa subsp. japonica (Rice) PE=1 SV=1	T	Signal transduction mechanisms	RecName: Full=Chitin elicitor receptor kinase 1; Short=OsCERK1; AltName: Full=LysM domain receptor-like kinase 1; Short=LysM RLK1; Short=LysM-containing receptor-like kinase 1; Flags: Precursor [Oryza sativa Japonica Group]
Os06g0572300	[C]	Energy production and conversion	Cellular Component: extracellular space (GO:0005615);; Molecular Function: UDP-N-acetylmuramate dehydrogenase activity (GO:0008762);; Biological Process: cytokinin metabolic process (GO:0009690);; Molecular Function: cytokinin dehydrogenase activity (GO:0019139);; Molecular Function: flavin adenine dinucleotide binding (GO:0050660);; Biological Process: oxidation-reduction process (GO:0055114);;	K00279|0|dosa:Os06t0572300-00|Os06g0572300; Similar to Cytokinin dehydrogenase 10.; K00279 cytokinin dehydrogenase [EC:1.5.99.12] (A)	[C]	Energy production and conversion	Cytokinin dehydrogenase 1, FAD and cytokinin binding;; FAD binding domain;; Cytokinin dehydrogenase 1, FAD and cytokinin binding	Cytokinin dehydrogenase 10 (Precursor) OS=Oryza sativa subsp. japonica (Rice) PE=3 SV=1	C	Energy production and conversion	RecName: Full=Cytokinin dehydrogenase 10; AltName: Full=Cytokinin oxidase 10; Short=OsCKX10; Flags: Precursor [Oryza sativa Japonica Group]
Os09g0515300	--	--	--	--	--	--	Domain of unknown function (DUF4504)	--	S	Function unknown	Os09g0515300 [Oryza sativa Japonica Group]
Os06g0523400	--	--	Cellular Component: Golgi membrane (GO:0000139);; Biological Process: RNA splicing, via endonucleolytic cleavage and ligation (GO:0000394);; Molecular Function: sugar:proton symporter activity (GO:0005351);; Molecular Function: CMP-N-acetylneuraminate transmembrane transporter activity (GO:0005456);; Biological Process: carbohydrate transport (GO:0008643);; Biological Process: methionine biosynth…	K15272|0|osa:4341175|Os06g0523400; K15272 solute carrier family 35 (UDP-sugar transporter), member A1/2/3 (A)	[G]	Carbohydrate transport and metabolism	Nucleotide-sugar transporter;; UAA transporter family;; EamA-like transporter family;; Triose-phosphate Transporter family	CMP-sialic acid transporter 1 GN=At5g41760 OS=Arabidopsis thaliana (Mouse-ear cress) PE=2 SV=1	G	Carbohydrate transport and metabolism	Os06g0523400 [Oryza sativa Japonica Group]
Os09g0523200	--	--	Cellular Component: plastid (GO:0009536);;	--	--	--	--	--	--	--	hypothetical protein [Oryza sativa Japonica Group]
Os09g0508300	[R]	General function prediction only	Cellular Component: plasma membrane (GO:0005886);; Molecular Function: zinc ion binding (GO:0008270);; Molecular Function: transferase activity (GO:0016740);;	--	[R]	General function prediction only	DHHC palmitoyltransferase	Probable protein S-acyltransferase 7 GN=PAT07 OS=Arabidopsis thaliana (Mouse-ear cress) PE=1 SV=1	R	General function prediction only	Os09g0508300 [Oryza sativa Japonica Group]
Os06g0574450	--	--	--	--	[S]	Function unknown	RPAP1-like, C-terminal;; RPAP1-like, N-terminal	--	S	Function unknown	hypothetical protein OsJ_21769 [Oryza sativa Japonica Group]
Os06g0624700	--	--	--	--	[S]	Function unknown	Glycosyltransferase family 92;; Glycosyl transferase family 2	--	S	Function unknown	Os06g0624700 [Oryza sativa Japonica Group]
Os09g0511500	--	--	Molecular Function: zinc ion binding (GO:0008270);;	--	--	--	Ring finger domain;; Zinc finger, C3HC4 type (RING finger)	--	O	Posttranslational modification, protein turnover, chaperones	Os09g0511500 [Oryza sativa Japonica Group]
Os09g0482821	--	--	Cellular Component: mitochondrion (GO:0005739);; Cellular Component: plastid (GO:0009536);;	--	--	--	--	--	--	--	retrotransposon protein, putative, Ty3-gypsy subclass [Oryza sativa Japonica Group]
Os09g0482800	--	--	Molecular Function: calcium ion binding (GO:0005509);;	--	--	--	EF hand;; EF hand;; EF-hand domain pair;; EF-hand domain;; EF-hand domain pair	--	S	Function unknown	Os09g0482800 [Oryza sativa Japonica Group]
Os09g0491772	[O]	Posttranslational modification, protein turnover, chaperones	Molecular Function: ATP binding (GO:0005524);; Cellular Component: cell wall (GO:0005618);; Cellular Component: mitochondrion (GO:0005739);; Cellular Component: plasma membrane (GO:0005886);; Biological Process: protein folding (GO:0006457);; Molecular Function: zinc ion binding (GO:0008270);; Biological Process: response to salt stress (GO:0009651);; Biological Process: response to cadmium ion (…	K04043|0|osa:9270165|Os09g0491772; K04043 molecular chaperone DnaK (A)	[O]	Posttranslational modification, protein turnover, chaperones	Hsp70 protein;; FGGY family of carbohydrate kinases, C-terminal domain	Heat shock 70 kDa protein, mitochondrial (Precursor) OS=Phaseolus vulgaris (Kidney bean) PE=1 SV=1	O	Posttranslational modification, protein turnover, chaperones	Os09g0491772 [Oryza sativa Japonica Group]
Os09g0505900	[R]	General function prediction only	Molecular Function: acid phosphatase activity (GO:0003993);; Molecular Function: protein serine/threonine phosphatase activity (GO:0004722);; Cellular Component: extracellular region (GO:0005576);; Cellular Component: cell wall (GO:0005618);; Cellular Component: cytoplasmic membrane-bounded vesicle (GO:0016023);; Molecular Function: metal ion binding (GO:0046872);;	--	[G]	Carbohydrate transport and metabolism	Calcineurin-like phosphoesterase;; Iron/zinc purple acid phosphatase-like protein C	Probable inactive purple acid phosphatase 27 (Precursor) GN=PAP27 OS=Arabidopsis thaliana (Mouse-ear cress) PE=2 SV=1	G	Carbohydrate transport and metabolism	hypothetical protein OsI_31956 [Oryza sativa Indica Group]
Os09g0491780	[O]	Posttranslational modification, protein turnover, chaperones	Molecular Function: ATP binding (GO:0005524);; Cellular Component: cell wall (GO:0005618);; Cellular Component: mitochondrion (GO:0005739);; Cellular Component: plasma membrane (GO:0005886);; Biological Process: protein folding (GO:0006457);; Molecular Function: zinc ion binding (GO:0008270);; Biological Process: response to salt stress (GO:0009651);; Biological Process: response to cadmium ion (…	K04043|7.84521e-59|osa:9270165|Os09g0491772; K04043 molecular chaperone DnaK (A)	[O]	Posttranslational modification, protein turnover, chaperones	Hsp70 protein	Heat shock 70 kDa protein 9, mitochondrial (Precursor) GN=F20D10.30 OS=Arabidopsis thaliana (Mouse-ear cress) PE=2 SV=1	O	Posttranslational modification, protein turnover, chaperones	hypothetical protein OsI_31865 [Oryza sativa Indica Group]
Os06g0523300	--	--	--	--	--	--	--	--	S	Function unknown	Os06g0523300 [Oryza sativa Japonica Group]
Os09g0508000	--	--	Molecular Function: RNA binding (GO:0003723);; Molecular Function: RNA-directed DNA polymerase activity (GO:0003964);; Biological Process: RNA-dependent DNA replication (GO:0006278);;	--	--	--	Auxin responsive protein	--	S	Function unknown	hypothetical protein OsI_31974 [Oryza sativa Indica Group]
Os06g0622550	--	--	Cellular Component: mitochondrion (GO:0005739);; Molecular Function: transaminase activity (GO:0008483);; Cellular Component: plastid (GO:0009536);;	--	--	--	Plant mobile domain	--	R	General function prediction only	aminotransferase-like protein [Oryza sativa Japonica Group]
Os09g0493800	[O]	Posttranslational modification, protein turnover, chaperones	--	--	[O]	Posttranslational modification, protein turnover, chaperones	X-domain of DnaJ-containing;; DnaJ domain	Chaperone protein dnaJ 10 GN=F28O16.7 OS=Arabidopsis thaliana (Mouse-ear cress) PE=2 SV=2	O	Posttranslational modification, protein turnover, chaperones	Os09g0493800 [Oryza sativa Japonica Group]
Os06g0566850	--	--	--	--	--	--	--	--	--	--	hypothetical protein OsI_22772 [Oryza sativa Indica Group]
Os09g0491756	--	--	Molecular Function: nucleotide binding (GO:0000166);; Molecular Function: DNA binding (GO:0003677);; Molecular Function: RNA binding (GO:0003723);; Cellular Component: nucleus (GO:0005634);; Biological Process: mRNA processing (GO:0006397);; Biological Process: RNA splicing (GO:0008380);; Molecular Function: metal ion binding (GO:0046872);; Biological Process: photoperiodism, flowering (GO:004857…	K12836|1.33468e-119|osa:9268567|Os09g0491756; K12836 splicing factor U2AF 35 kDa subunit (A)	[A]	RNA processing and modification	Zinc finger C-x8-C-x5-C-x3-H type (and similar);; RNA recognition motif. (a.k.a. RRM, RBD, or RNP domain);; RNA recognition motif. (a.k.a. RRM, RBD, or RNP domain)	Splicing factor U2af small subunit A GN=OsJ_028686 OS=Oryza sativa subsp. japonica (Rice) PE=2 SV=1	A	RNA processing and modification	U2 snRNP auxiliary factor, small subunit [Oryza sativa]
Os06g0570650	--	--	Molecular Function: protein serine/threonine kinase activity (GO:0004674);; Molecular Function: protein binding (GO:0005515);; Molecular Function: ATP binding (GO:0005524);; Cellular Component: plasma membrane (GO:0005886);; Biological Process: protein phosphorylation (GO:0006468);; Biological Process: multicellular organismal development (GO:0007275);; Biological Process: response to water depri…	--	[T]	Signal transduction mechanisms	--	Putative CBL-interacting protein kinase 27 GN=P0701F11.10 OS=Oryza sativa subsp. japonica (Rice) PE=3 SV=1	T	Signal transduction mechanisms	hypothetical protein OsI_23431 [Oryza sativa Indica Group]
Os09g0515550	--	--	--	--	--	--	--	--	--	--	hypothetical protein SORBIDRAFT_02g029816 [Sorghum bicolor]
Os09g0495500	--	--	--	--	--	--	--	--	--	--	hypothetical protein OsJ_29876 [Oryza sativa Japonica Group]
Os06g0581151	--	--	Molecular Function: transporter activity (GO:0005215);; Cellular Component: plasma membrane (GO:0005886);; Biological Process: transport (GO:0006810);; Biological Process: response to nematode (GO:0009624);;	--	[E]	Amino acid transport and metabolism	POT family	Protein NRT1/ PTR FAMILY 4.6 GN=At1g69850 OS=Arabidopsis thaliana (Mouse-ear cress) PE=1 SV=1	P	Inorganic ion transport and metabolism	Os06g0581000 [Oryza sativa Japonica Group]
Os09g0488750	--	--	--	--	--	--	--	--	S	Function unknown	Os09g0488700 [Oryza sativa Japonica Group]
Os09g0489800	--	--	Molecular Function: sequence-specific DNA binding transcription factor activity (GO:0003700);; Molecular Function: protein serine/threonine kinase activity (GO:0004674);; Molecular Function: GTPase activator activity (GO:0005096);; Biological Process: regulation of transcription, DNA-templated (GO:0006355);; Biological Process: protein phosphorylation (GO:0006468);; Biological Process: response t…	K14431|1.5516e-57|osa:4347436|Os09g0489500; K14431 transcription factor TGA (A)	--	--	Seed dormancy control	Transcription factor HBP-1b(c38) OS=Triticum aestivum (Wheat) PE=2 SV=1	K	Transcription	unnamed protein product [Oryza sativa Japonica Group]
Os09g0499201	--	--	--	--	--	--	--	--	S	Function unknown	Os09g0499000 [Oryza sativa Japonica Group]
Os06g0581500	[S]	Function unknown	Molecular Function: protein serine/threonine kinase activity (GO:0004674);; Molecular Function: ATP binding (GO:0005524);; Biological Process: protein phosphorylation (GO:0006468);; Cellular Component: integral component of membrane (GO:0016021);; Cellular Component: cytoplasmic membrane-bounded vesicle (GO:0016023);;	--	--	--	Leucine rich repeat;; Leucine Rich repeats (2 copies);; Protein kinase domain;; Protein tyrosine kinase;; Leucine Rich Repeat;; Leucine Rich repeat;; Leucine rich repeat N-terminal domain;; FNIP Repeat	Probable LRR receptor-like serine/threonine-protein kinase At3g47570 (Precursor) GN=At3g47570 OS=Arabidopsis thaliana (Mouse-ear cress) PE=2 SV=1	T	Signal transduction mechanisms	Os06g0581500 [Oryza sativa Japonica Group]
Os06g0528350	--	--	--	--	--	--	--	--	--	--	Os06g0528350 [Oryza sativa Japonica Group]
Os06g0618600	--	--	Biological Process: cell wall biogenesis (GO:0042546);; Biological Process: cell wall macromolecule metabolic process (GO:0044036);;	--	[S]	Function unknown	Rgp1	--	S	Function unknown	Os06g0618600 [Oryza sativa Japonica Group]
Os09g0510500	--	--	Molecular Function: protein dimerization activity (GO:0046983);;	--	--	--	Helix-loop-helix DNA-binding domain	Transcription factor bHLH137 GN=K3K7 OS=Arabidopsis thaliana (Mouse-ear cress) PE=2 SV=1	K	Transcription	Os09g0510500 [Oryza sativa Japonica Group]
Os09g0488000	[KR]	--	Molecular Function: glucosamine 6-phosphate N-acetyltransferase activity (GO:0004343);; Cellular Component: endoplasmic reticulum membrane (GO:0005789);; Biological Process: N-acetylglucosamine biosynthetic process (GO:0006045);; Biological Process: UDP-N-acetylglucosamine biosynthetic process (GO:0006048);; Biological Process: root development (GO:0048364);;	K00621|6.31319e-59|osa:4347432|Os09g0488000; K00621 glucosamine-phosphate N-acetyltransferase [EC:2.3.1.4] (A)	[M]	Cell wall/membrane/envelope biogenesis	Acetyltransferase (GNAT) family;; Acetyltransferase (GNAT) domain;; Acetyltransferase (GNAT) domain	Glucosamine 6-phosphate N-acetyltransferase 1 GN=GNA1 OS=Oryza sativa subsp. japonica (Rice) PE=1 SV=1	M	Cell wall/membrane/envelope biogenesis	Os09g0488000 [Oryza sativa Japonica Group]
Os09g0501850	--	--	Biological Process: protein peptidyl-prolyl isomerization (GO:0000413);; Molecular Function: peptidyl-prolyl cis-trans isomerase activity (GO:0003755);; Cellular Component: vacuole (GO:0005773);; Biological Process: protein folding (GO:0006457);; Cellular Component: cytoplasmic membrane-bounded vesicle (GO:0016023);;	K09569|2.43261e-85|osa:9269317|Os09g0501850; K09569 FK506-binding protein 2 [EC:5.2.1.8] (A)	[O]	Posttranslational modification, protein turnover, chaperones	FKBP-type peptidyl-prolyl cis-trans isomerase	Peptidyl-prolyl cis-trans isomerase FKBP15-1 (Precursor) GN=FKBP15-1 OS=Arabidopsis thaliana (Mouse-ear cress) PE=2 SV=2	O	Posttranslational modification, protein turnover, chaperones	Os09g0501850 [Oryza sativa Japonica Group]
Os09g0505000	--	--	Molecular Function: zinc ion binding (GO:0008270);;	--	--	--	Zinc finger, C3HC4 type (RING finger);; Zinc finger, C3HC4 type (RING finger);; Zinc finger, C3HC4 type (RING finger)	--	O	Posttranslational modification, protein turnover, chaperones	Os09g0505000 [Oryza sativa Japonica Group]
Os09g0509400	--	--	--	--	[S]	Function unknown	Chromosome segregation during meiosis;; Domain of unknown function (DUF4210)	--	S	Function unknown	Os09g0509400 [Oryza sativa Japonica Group]
Os09g0493500	[MG]	--	Molecular Function: nucleotide binding (GO:0000166);; Molecular Function: catalytic activity (GO:0003824);; Cellular Component: endoplasmic reticulum (GO:0005783);; Biological Process: seed development (GO:0048316);; Molecular Function: coenzyme binding (GO:0050662);; Biological Process: sporopollenin biosynthetic process (GO:0080110);;	--	[V]	Defense mechanisms	NAD dependent epimerase/dehydratase family;; NADH(P)-binding;; 3-beta hydroxysteroid dehydrogenase/isomerase family;; Male sterility protein;; KR domain;; short chain dehydrogenase;; NmrA-like family	Tetraketide alpha-pyrone reductase 1 GN=F23E12.20 OS=Arabidopsis thaliana (Mouse-ear cress) PE=2 SV=1	V	Defense mechanisms	Os09g0493500 [Oryza sativa Japonica Group]
Os09g0482600	[O]	Posttranslational modification, protein turnover, chaperones	Molecular Function: ATP binding (GO:0005524);; Cellular Component: cell wall (GO:0005618);; Cellular Component: nucleolus (GO:0005730);; Cellular Component: mitochondrion (GO:0005739);; Cellular Component: cytosol (GO:0005829);; Cellular Component: plasma membrane (GO:0005886);; Biological Process: protein folding (GO:0006457);; Biological Process: defense response (GO:0006952);; Biological Proce…	K04079|0|osa:9267802|Os09g0482610; K04079 molecular chaperone HtpG (A)	[O]	Posttranslational modification, protein turnover, chaperones	Hsp90 protein;; Histidine kinase-, DNA gyrase B-, and HSP90-like ATPase;; Histidine kinase-, DNA gyrase B-, and HSP90-like ATPase	Heat shock protein 81-3 GN=P0463D04.35 OS=Oryza sativa subsp. japonica (Rice) PE=2 SV=2	O	Posttranslational modification, protein turnover, chaperones	Os09g0482400 [Oryza sativa Japonica Group]
Os09g0500200	--	--	Cellular Component: mitochondrion (GO:0005739);; Molecular Function: NADH dehydrogenase (ubiquinone) activity (GO:0008137);; Molecular Function: electron carrier activity (GO:0009055);; Cellular Component: plastid (GO:0009536);; Cellular Component: membrane (GO:0016020);; Biological Process: oxidation-reduction process (GO:0055114);;	K18160|4.38749e-107|dosa:Os09t0500200-01|Os09g0500200; Similar to oxidoreductase.; K18160 NADH dehydrogenase [ubiquinone] 1 alpha subcomplex assembly factor 2 (A)	--	--	NADH ubiquinone oxidoreductase subunit NDUFA12	--	R	General function prediction only	hypothetical protein OsI_31916 [Oryza sativa Indica Group]
Os09g0509050	--	--	Molecular Function: DNA binding (GO:0003677);; Biological Process: regulation of transcription, DNA-templated (GO:0006355);;	--	--	--	--	NAC transcription factor 25 GN=At1g61110 OS=Arabidopsis thaliana (Mouse-ear cress) PE=2 SV=1	S	Function unknown	Os09g0509100 [Oryza sativa Japonica Group]
Os09g0486900	[RTKL]	--	Molecular Function: protein serine/threonine kinase activity (GO:0004674);; Molecular Function: ATP binding (GO:0005524);; Biological Process: protein phosphorylation (GO:0006468);;	--	[R]	General function prediction only	Protein kinase domain;; Protein tyrosine kinase	Serine/threonine-protein kinase UCNL {ECO:0000305} OS=Arabidopsis thaliana (Mouse-ear cress) PE=2 SV=1	T	Signal transduction mechanisms	PREDICTED: serine/threonine-protein kinase OXI1-like [Oryza brachyantha]
Os09g0523700	--	--	Cellular Component: mitochondrion (GO:0005739);;	--	--	--	--	--	S	Function unknown	hypothetical protein [Oryza sativa Japonica Group]
Os09g0484900	[P]	Inorganic ion transport and metabolism	Cellular Component: vacuole (GO:0005773);; Biological Process: sodium ion transport (GO:0006814);; Molecular Function: malate transmembrane transporter activity (GO:0015140);; Cellular Component: membrane (GO:0016020);; Biological Process: malate transmembrane transport (GO:0071423);;	K14445|0|osa:4347418|Os09g0484900; K14445 solute carrier family 13 (sodium-dependent dicarboxylate transporter), member 2/3/5 (A)	[P]	Inorganic ion transport and metabolism	Sodium:sulfate symporter transmembrane region	Tonoplast dicarboxylate transporter GN=MNJ7.15 OS=Arabidopsis thaliana (Mouse-ear cress) PE=2 SV=2	P	Inorganic ion transport and metabolism	Os09g0484900 [Oryza sativa Japonica Group]
Os06g0570600	--	--	Molecular Function: monooxygenase activity (GO:0004497);; Molecular Function: iron ion binding (GO:0005506);; Cellular Component: endoplasmic reticulum (GO:0005783);; Molecular Function: electron carrier activity (GO:0009055);; Biological Process: gibberellin biosynthetic process (GO:0009686);; Cellular Component: chloroplast outer membrane (GO:0009707);; Biological Process: gibberellic acid medi…	--	[Q]	Secondary metabolites biosynthesis, transport and catabolism	Cytochrome P450	Ent-kaurene oxidase-like protein 1 {ECO:0000303|PubMed:15316288} OS=Oryza sativa subsp. japonica (Rice) PE=5 SV=1	Q	Secondary metabolites biosynthesis, transport and catabolism	Os06g0570632 [Oryza sativa Japonica Group]
Os09g0502600	--	--	Cellular Component: mitochondrion (GO:0005739);; Cellular Component: cytoplasmic membrane-bounded vesicle (GO:0016023);;	--	--	--	--	F-box/FBD/LRR-repeat protein At1g13570 GN=At1g13570 OS=Arabidopsis thaliana (Mouse-ear cress) PE=2 SV=1	R	General function prediction only	hypothetical protein OsJ_29914 [Oryza sativa Japonica Group]
Os09g0482840	--	--	Molecular Function: calcium ion binding (GO:0005509);;	--	--	--	EF hand;; EF hand;; EF-hand domain pair;; EF-hand domain;; EF-hand domain pair	--	T	Signal transduction mechanisms	Os09g0482840 [Oryza sativa Japonica Group]
Os09g0474400	--	--	Molecular Function: transferase activity (GO:0016740);;	--	[R]	General function prediction only	PPR repeat family;; PPR repeat	Putative pentatricopeptide repeat-containing protein At3g13770, mitochondrial (Precursor) GN=PCMP-H85 OS=Arabidopsis thaliana (Mouse-ear cress) PE=3 SV=1	R	General function prediction only	Os09g0474400 [Oryza sativa Japonica Group]
Os09g0509450	--	--	--	--	[S]	Function unknown	Domain of unknown function (DUF4210)	--	S	Function unknown	Os09g0509400 [Oryza sativa Japonica Group]
Os09g0491596	--	--	--	--	--	--	--	--	S	Function unknown	Os09g0491596 [Oryza sativa Japonica Group]
Os06g0578100	--	--	Cellular Component: cytoplasmic membrane-bounded vesicle (GO:0016023);;	--	--	--	von Willebrand factor type A domain;; von Willebrand factor type A domain;; von Willebrand factor type A domain	--	R	General function prediction only	Os06g0578100 [Oryza sativa Japonica Group]
Os09g0509100	--	--	Molecular Function: DNA binding (GO:0003677);; Biological Process: regulation of transcription, DNA-templated (GO:0006355);;	--	--	--	No apical meristem (NAM) protein	NAC transcription factor NAM-B2 GN=NAM-B2 OS=Triticum turgidum subsp. durum (Durum wheat) PE=2 SV=1	S	Function unknown	Os09g0509100 [Oryza sativa Japonica Group]
Os09g0482500	--	--	Molecular Function: DNA binding (GO:0003677);; Molecular Function: aspartic-type endopeptidase activity (GO:0004190);; Biological Process: proteolysis (GO:0006508);; Cellular Component: apoplast (GO:0048046);;	--	[O]	Posttranslational modification, protein turnover, chaperones	Xylanase inhibitor N-terminal;; Xylanase inhibitor C-terminal;; Eukaryotic aspartyl protease	Protein ASPARTIC PROTEASE IN GUARD CELL 1 (Precursor) GN=ASPG1 OS=Arabidopsis thaliana (Mouse-ear cress) PE=1 SV=1	O	Posttranslational modification, protein turnover, chaperones	Os09g0482200 [Oryza sativa Japonica Group]
Os09g0491740	--	--	Cellular Component: integral component of membrane (GO:0016021);; Cellular Component: cytoplasmic membrane-bounded vesicle (GO:0016023);; Biological Process: transmembrane transport (GO:0055085);;	--	[S]	Function unknown	Membrane transport protein	--	S	Function unknown	Os09g0491740 [Oryza sativa Japonica Group]
Os09g0509000	--	--	--	--	--	--	--	Uncharacterized protein At3g15000, mitochondrial GN=At3g15000 OS=Arabidopsis thaliana (Mouse-ear cress) PE=1 SV=1	S	Function unknown	Os09g0509000 [Oryza sativa Japonica Group]
Os09g0513000	[R]	General function prediction only	Cellular Component: nucleus (GO:0005634);; Cellular Component: plasma membrane (GO:0005886);; Biological Process: protein folding (GO:0006457);; Biological Process: defense response to bacterium, incompatible interaction (GO:0009816);; Biological Process: vegetative to reproductive phase transition of meristem (GO:0010228);; Cellular Component: integral component of chloroplast outer membrane (GO…	--	[R]	General function prediction only	Ankyrin repeats (3 copies);; Ankyrin repeats (many copies);; Ankyrin repeats (many copies);; Ankyrin repeat;; Ankyrin repeat	Ankyrin repeat domain-containing protein 2 GN=F15J1.20 OS=Arabidopsis thaliana (Mouse-ear cress) PE=1 SV=2	R	General function prediction only	putative TGB12K interacting protein 3 [Oryza sativa Japonica Group]
Os09g0502500	[CR]	--	Cellular Component: vacuole (GO:0005773);; Cellular Component: plasma membrane (GO:0005886);; Molecular Function: zinc ion binding (GO:0008270);; Cellular Component: chloroplast thylakoid membrane (GO:0009535);; Molecular Function: oxidoreductase activity (GO:0016491);; Biological Process: oxidation-reduction process (GO:0055114);;	--	[CR]	--	Zinc-binding dehydrogenase;; Alcohol dehydrogenase GroES-like domain;; Zinc-binding dehydrogenase	Putative quinone-oxidoreductase homolog, chloroplastic GN=At4g13010 OS=Arabidopsis thaliana (Mouse-ear cress) PE=2 SV=1	Q	Secondary metabolites biosynthesis, transport and catabolism	Os09g0502500 [Oryza sativa Japonica Group]
Os09g0482780	--	--	--	--	--	--	Fasciclin domain	Fasciclin-like arabinogalactan protein 7 (Precursor) GN=FLA7 OS=Arabidopsis thaliana (Mouse-ear cress) PE=1 SV=1	R	General function prediction only	Os09g0482780 [Oryza sativa Japonica Group]
Os09g0497400	--	--	Biological Process: cell morphogenesis (GO:0000902);; Cellular Component: mitochondrion (GO:0005739);; Cellular Component: endoplasmic reticulum (GO:0005783);; Cellular Component: membrane (GO:0016020);; Biological Process: cell growth (GO:0016049);; Biological Process: Golgi vesicle transport (GO:0048193);;	--	[S]	Function unknown	Integral membrane protein DUF106	--	S	Function unknown	Os09g0497400 [Oryza sativa Japonica Group]
Os09g0491820	[MG]	--	Molecular Function: catalytic activity (GO:0003824);; Biological Process: cellular metabolic process (GO:0044237);; Biological Process: response to cadmium ion (GO:0046686);; Molecular Function: coenzyme binding (GO:0050662);;	--	[V]	Defense mechanisms	NAD dependent epimerase/dehydratase family;; 3-beta hydroxysteroid dehydrogenase/isomerase family;; NADH(P)-binding;; Male sterility protein;; short chain dehydrogenase;; Polysaccharide biosynthesis protein;; NmrA-like family;; KR domain	Cinnamoyl-CoA reductase 1 GN=T24D18.5 OS=Arabidopsis thaliana (Mouse-ear cress) PE=1 SV=1	Q	Secondary metabolites biosynthesis, transport and catabolism	Os09g0491820 [Oryza sativa Japonica Group]
Os09g0482680	[R]	General function prediction only	Biological Process: rRNA processing (GO:0006364);; Cellular Component: chloroplast (GO:0009507);; Biological Process: chloroplast organization (GO:0009658);; Biological Process: mRNA modification (GO:0016556);; Biological Process: tRNA 3'-end processing (GO:0042780);; Molecular Function: 3'-tRNA processing endoribonuclease activity (GO:0042781);;	K00784|0|osa:9269203|Os09g0482680; K00784 ribonuclease Z [EC:3.1.26.11] (A)	--	--	Beta-lactamase superfamily domain;; Metallo-beta-lactamase superfamily	Ribonuclease Z, chloroplastic (Precursor) GN=CPZ OS=Arabidopsis thaliana (Mouse-ear cress) PE=2 SV=1	R	General function prediction only	Os09g0482680 [Oryza sativa Japonica Group]
Os09g0506800	--	--	Biological Process: leptotene (GO:0000237);; Biological Process: zygotene (GO:0000238);; Cellular Component: condensed nuclear chromosome (GO:0000794);; Biological Process: megasporogenesis (GO:0009554);; Biological Process: microsporogenesis (GO:0009556);; Biological Process: chiasma assembly (GO:0051026);;	--	[B]	Chromatin structure and dynamics	HORMA domain	--	B	Chromatin structure and dynamics	essential protein for meiotic synapsis [Oryza sativa Japonica Group]
Os09g0494500	--	--	Molecular Function: DNA binding (GO:0003677);; Cellular Component: nucleus (GO:0005634);; Molecular Function: zinc ion binding (GO:0008270);;	--	--	--	--	--	S	Function unknown	hypothetical protein OsI_31887 [Oryza sativa Indica Group]
Os06g0626950	--	--	Molecular Function: sequence-specific DNA binding transcription factor activity (GO:0003700);; Biological Process: regulation of transcription, DNA-templated (GO:0006355);; Cellular Component: plastid (GO:0009536);; Molecular Function: oxidoreductase activity, acting on paired donors, with incorporation or reduction of molecular oxygen, 2-oxoglutarate as one donor, and incorporation of one atom e…	--	--	--	Basic region leucine zipper	--	Q	Secondary metabolites biosynthesis, transport and catabolism	hypothetical protein [Oryza sativa Japonica Group]
Os06g0528300	--	--	--	K14496|4.62356e-127|osa:4341194|Os06g0528300; K14496 abscisic acid receptor PYR/PYL family (A)	--	--	Polyketide cyclase / dehydrase and lipid transport	Abscisic acid receptor PYL8 GN=MFH8.10 OS=Arabidopsis thaliana (Mouse-ear cress) PE=1 SV=1	R	General function prediction only	Os06g0528300 [Oryza sativa Japonica Group]
Os06g0626466	--	--	Cellular Component: mitochondrion (GO:0005739);; Cellular Component: plastid (GO:0009536);;	--	--	--	--	--	--	--	hypothetical protein LOC_Os12g08250 [Oryza sativa Japonica Group]
Os06g0570100	[Q]	Secondary metabolites biosynthesis, transport and catabolism	Molecular Function: monooxygenase activity (GO:0004497);; Molecular Function: iron ion binding (GO:0005506);; Cellular Component: endoplasmic reticulum (GO:0005783);; Molecular Function: electron carrier activity (GO:0009055);; Biological Process: gibberellin biosynthetic process (GO:0009686);; Cellular Component: chloroplast outer membrane (GO:0009707);; Biological Process: gibberellic acid medi…	K04122|0|osa:4341347|Os06g0570100; K04122 ent-kaurene oxidase [EC:1.14.13.78] (A)	[Q]	Secondary metabolites biosynthesis, transport and catabolism	Cytochrome P450	Ent-kaurene oxidase 2 OS=Oryza sativa subsp. japonica (Rice) PE=1 SV=1	Q	Secondary metabolites biosynthesis, transport and catabolism	Os06g0570100 [Oryza sativa Japonica Group]
Os09g0512800	--	--	Cellular Component: chloroplast (GO:0009507);;	--	--	--	--	--	S	Function unknown	hypothetical protein OsI_32020 [Oryza sativa Indica Group]
Os09g0515400	--	--	Biological Process: rRNA processing (GO:0006364);; Biological Process: tRNA metabolic process (GO:0006399);; Biological Process: protein folding (GO:0006457);; Biological Process: aromatic amino acid family biosynthetic process (GO:0009073);; Cellular Component: chloroplast stroma (GO:0009570);; Biological Process: chloroplast organization (GO:0009658);; Biological Process: photosystem II assembl…	--	--	--	Bacterial trigger factor protein (TF)	--	S	Function unknown	hypothetical protein OsJ_30007 [Oryza sativa Japonica Group]
Os06g0623200	--	--	Molecular Function: catalytic activity (GO:0003824);; Cellular Component: mitochondrion (GO:0005739);; Biological Process: cellular metabolic process (GO:0044237);; Molecular Function: coenzyme binding (GO:0050662);;	--	[V]	Defense mechanisms	NAD dependent epimerase/dehydratase family;; 3-beta hydroxysteroid dehydrogenase/isomerase family;; NADH(P)-binding;; short chain dehydrogenase	Cinnamoyl-CoA reductase 2 GN=CCR2 OS=Arabidopsis thaliana (Mouse-ear cress) PE=1 SV=1	V	Defense mechanisms	Os06g0623200 [Oryza sativa Japonica Group]
Os09g0498100	[J]	Translation, ribosomal structure and biogenesis	Molecular Function: structural constituent of ribosome (GO:0003735);; Cellular Component: mitochondrion (GO:0005739);; Cellular Component: ribosome (GO:0005840);; Biological Process: translation (GO:0006412);; Cellular Component: plastid (GO:0009536);; Biological Process: production of ta-siRNAs involved in RNA interference (GO:0010267);; Biological Process: production of miRNAs involved in gene …	K02959|4.75828e-83|osa:4347467|Os09g0498100; K02959 small subunit ribosomal protein S16 (A)	[J]	Translation, ribosomal structure and biogenesis	Ribosomal protein S16	30S ribosomal protein S16, chloroplastic {ECO:0000255|HAMAP-Rule:MF_00385} OS=Emiliania huxleyi (Pontosphaera huxleyi) PE=3 SV=1	J	Translation, ribosomal structure and biogenesis	Os09g0498100 [Oryza sativa Japonica Group]
Os09g0493400	--	--	--	--	--	--	Protein of unknown function, DUF547;; Leucine-zipper of ternary complex factor MIP1	--	S	Function unknown	hypothetical protein OsJ_29864 [Oryza sativa Japonica Group]
Os06g0528600	[E]	Amino acid transport and metabolism	Molecular Function: spermidine synthase activity (GO:0004766);; Biological Process: polyamine biosynthetic process (GO:0006596);; Molecular Function: spermine synthase activity (GO:0016768);;	K00797|0|osa:4341195|Os06g0528600; K00797 spermidine synthase [EC:2.5.1.16] (A)	[E]	Amino acid transport and metabolism	Spermine/spermidine synthase;; Methyltransferase domain;; Methyltransferase domain	Spermine synthase GN=MFH8.5 OS=Arabidopsis thaliana (Mouse-ear cress) PE=1 SV=1	E	Amino acid transport and metabolism	Os06g0528600 [Oryza sativa Japonica Group]
Os09g0485201	[C]	Energy production and conversion	Molecular Function: NADH dehydrogenase (ubiquinone) activity (GO:0008137);; Molecular Function: electron carrier activity (GO:0009055);; Cellular Component: photosystem I (GO:0009522);; Cellular Component: chloroplast thylakoid membrane (GO:0009535);; Biological Process: photosynthetic electron transport in photosystem I (GO:0009773);; Biological Process: ATP synthesis coupled electron transport …	K02691|5.01449e-54|dosa:Os09t0485201-00|Os09g0485201; Similar to photosystem I subunit VII.; K02691 photosystem I subunit VII (A)	--	--	4Fe-4S dicluster domain;; 4Fe-4S binding domain;; 4Fe-4S dicluster domain;; 4Fe-4S dicluster domain;; 4Fe-4S dicluster domain;; 4Fe-4S binding domain	Photosystem I iron-sulfur center {ECO:0000255|HAMAP-Rule:MF_01303} OS=Triticum aestivum (Wheat) PE=3 SV=2	C	Energy production and conversion	photosystem I subunit VII [Oryza sativa Japonica Group]
Os09g0510700	[U]	Intracellular trafficking, secretion, and vesicular transport	Cellular Component: cytosol (GO:0005829);; Cellular Component: plasma membrane (GO:0005886);; Biological Process: cytoskeleton organization (GO:0007010);; Molecular Function: ARF GTPase activator activity (GO:0008060);; Molecular Function: zinc ion binding (GO:0008270);; Biological Process: response to auxin (GO:0009733);; Biological Process: leaf morphogenesis (GO:0009965);; Biological Process: …	K12489|0|osa:4347541|Os09g0510700; K12489 Arf-GAP with coiled-coil, ANK repeat and PH domain-containing protein (A)	[T]	Signal transduction mechanisms	Putative GTPase activating protein for Arf;; Ankyrin repeats (3 copies);; Ankyrin repeat;; PH domain;; Ankyrin repeats (many copies);; Ankyrin repeats (many copies);; BAR domain;; Ankyrin repeat	ADP-ribosylation factor GTPase-activating protein AGD3 GN=T31B5.120 OS=Arabidopsis thaliana (Mouse-ear cress) PE=1 SV=1	T	Signal transduction mechanisms	Os09g0510700 [Oryza sativa Japonica Group]
Os09g0484800	[R]	General function prediction only	Molecular Function: calmodulin binding (GO:0005516);; Cellular Component: plasma membrane (GO:0005886);; Biological Process: response to abscisic acid (GO:0009737);;	K06911|0|osa:4347417|Os09g0484800; K06911 (A)	--	--	Pirin;; Pirin C-terminal cupin domain;; Cupin domain	Pirin-like protein At1g50590 GN=At1g50590 OS=Arabidopsis thaliana (Mouse-ear cress) PE=2 SV=1	S	Function unknown	Os09g0484800 [Oryza sativa Japonica Group]
Os09g0513600	[RTKL]	--	Molecular Function: protein tyrosine kinase activity (GO:0004713);; Molecular Function: ATP binding (GO:0005524);; Cellular Component: plasma membrane (GO:0005886);; Biological Process: protein phosphorylation (GO:0006468);;	K13436|0|dosa:Os09t0513600-01|Os09g0513600; Similar to predicted protein.; K13436 pto-interacting protein 1 [EC:2.7.11.1] (A)	[T]	Signal transduction mechanisms	Protein tyrosine kinase;; Protein kinase domain	PTI1-like tyrosine-protein kinase 3 GN=PTI13 OS=Arabidopsis thaliana (Mouse-ear cress) PE=1 SV=1	T	Signal transduction mechanisms	putative Pto kinase interactor 1 [Oryza sativa Japonica Group]
Os06g0564400	[E]	Amino acid transport and metabolism	Molecular Function: cysteine synthase activity (GO:0004124);; Biological Process: cysteine biosynthetic process from serine (GO:0006535);;	K01738|4.59841e-168|dosa:Os06t0564400-00|Os06g0564400; Similar to Cysteine synthase.; K01738 cysteine synthase A [EC:2.5.1.47] (A)	[E]	Amino acid transport and metabolism	Pyridoxal-phosphate dependent enzyme	Cysteine synthase, chloroplastic/chromoplastic (Precursor) GN=CYSK OS=Spinacia oleracea (Spinach) PE=1 SV=2	E	Amino acid transport and metabolism	putative cysteine synthase [Oryza sativa Japonica Group]
Os06g0574200	[RTKL]	--	Cellular Component: ubiquitin ligase complex (GO:0000151);; Molecular Function: protein serine/threonine kinase activity (GO:0004674);; Molecular Function: ubiquitin-protein transferase activity (GO:0004842);; Molecular Function: ATP binding (GO:0005524);; Biological Process: protein phosphorylation (GO:0006468);; Biological Process: response to stress (GO:0006950);; Cellular Component: plastid (…	--	--	--	Protein kinase domain;; Protein tyrosine kinase;; U-box domain;; Universal stress protein family	Serine/threonine-protein kinase GN=PUB34 OS=Arabidopsis thaliana (Mouse-ear cress) PE=3 SV=1	T	Signal transduction mechanisms	Os06g0574200 [Oryza sativa Japonica Group]
Os09g0488600	--	--	Cellular Component: plastid (GO:0009536);; Biological Process: response to ethylene (GO:0009723);;	--	--	--	--	--	S	Function unknown	Os09g0488600 [Oryza sativa Japonica Group]
Os09g0516451	[MG]	--	Molecular Function: nucleotide binding (GO:0000166);; Molecular Function: 3-beta-hydroxy-delta5-steroid dehydrogenase activity (GO:0003854);; Molecular Function: hydroxyacylglutathione hydrolase activity (GO:0004416);; Cellular Component: endoplasmic reticulum (GO:0005783);; Cellular Component: plasma membrane (GO:0005886);; Biological Process: steroid biosynthetic process (GO:0006694);; Biologic…	--	[IE]	--	3-beta hydroxysteroid dehydrogenase/isomerase family;; NAD dependent epimerase/dehydratase family	3beta-hydroxysteroid-dehydrogenase/decarboxylase isoform 2 GN=T1D16.10 OS=Arabidopsis thaliana (Mouse-ear cress) PE=2 SV=2	EI	--	hypothetical protein OsI_32045 [Oryza sativa Indica Group]
Os06g0626733	--	--	Molecular Function: iron ion binding (GO:0005506);; Biological Process: proteolysis (GO:0006508);; Biological Process: vacuole organization (GO:0007033);; Molecular Function: metallopeptidase activity (GO:0008237);; Biological Process: response to wounding (GO:0009611);; Biological Process: anthocyanin-containing compound biosynthetic process (GO:0009718);; Biological Process: response to jasmoni…	K05277|1.45329e-27|osa:4341576|Os06g0626700; K05277 leucoanthocyanidin dioxygenase [EC:1.14.11.19] (A)	[QR]	--	--	Leucoanthocyanidin dioxygenase GN=A2 OS=Zea mays (Maize) PE=2 SV=1	H	Coenzyme transport and metabolism	hypothetical protein OsI_23779 [Oryza sativa Indica Group]
Os06g0569500	[Q]	Secondary metabolites biosynthesis, transport and catabolism	Molecular Function: monooxygenase activity (GO:0004497);; Molecular Function: iron ion binding (GO:0005506);; Cellular Component: endoplasmic reticulum (GO:0005783);; Molecular Function: electron carrier activity (GO:0009055);; Biological Process: gibberellin biosynthetic process (GO:0009686);; Cellular Component: chloroplast outer membrane (GO:0009707);; Biological Process: ent-kaurene oxidation…	--	[Q]	Secondary metabolites biosynthesis, transport and catabolism	Cytochrome P450	Ent-sandaracopimaradiene 3-hydroxylase {ECO:0000303|PubMed:22247270} OS=Oryza sativa subsp. japonica (Rice) PE=1 SV=1	Q	Secondary metabolites biosynthesis, transport and catabolism	Os06g0569500 [Oryza sativa Japonica Group]
Os06g0524700	--	--	--	--	--	--	Plant protein of unknown function	UPF0481 protein At3g47200 GN=At3g47200 OS=Arabidopsis thaliana (Mouse-ear cress) PE=2 SV=1	S	Function unknown	Os06g0524700 [Oryza sativa Japonica Group]
Os06g0521200	--	--	Molecular Function: peroxidase activity (GO:0004601);; Biological Process: response to oxidative stress (GO:0006979);; Cellular Component: cytoplasmic membrane-bounded vesicle (GO:0016023);; Molecular Function: heme binding (GO:0020037);; Molecular Function: metal ion binding (GO:0046872);; Biological Process: oxidation-reduction process (GO:0055114);;	K00430|0|dosa:Os06t0521200-00|Os06g0521200; Similar to peroxidase 52.; K00430 peroxidase [EC:1.11.1.7] (A)	--	--	Peroxidase;; Peroxidase	Peroxidase 4 {ECO:0000250|UniProtKB:Q42578} (Precursor) OS=Vitis vinifera (Grape) PE=1 SV=1	R	General function prediction only	Os06g0521200 [Oryza sativa Japonica Group]
Os09g0489500	--	--	Molecular Function: sequence-specific DNA binding transcription factor activity (GO:0003700);; Molecular Function: protein serine/threonine kinase activity (GO:0004674);; Molecular Function: GTPase activator activity (GO:0005096);; Biological Process: regulation of transcription, DNA-templated (GO:0006355);; Biological Process: protein phosphorylation (GO:0006468);; Biological Process: response t…	K14431|0|osa:4347436|Os09g0489500; K14431 transcription factor TGA (A)	--	--	Seed dormancy control;; bZIP transcription factor;; Basic region leucine zipper	Transcription factor HBP-1b(c38) OS=Triticum aestivum (Wheat) PE=2 SV=1	K	Transcription	hypothetical protein OsI_31848 [Oryza sativa Indica Group]
Os09g0512066	--	--	Cellular Component: endoplasmic reticulum (GO:0005783);; Biological Process: protein transport (GO:0015031);; Cellular Component: membrane (GO:0016020);;	--	[UO]	--	Plug domain of Sec61p	--	U	Intracellular trafficking, secretion, and vesicular transport	Os09g0512000 [Oryza sativa Japonica Group]
Os06g0570900	--	--	Cellular Component: nucleus (GO:0005634);; Molecular Function: protein dimerization activity (GO:0046983);;	--	--	--	Helix-loop-helix DNA-binding domain	Putative transcription factor bHLH041 GN=MHM17.7 OS=Arabidopsis thaliana (Mouse-ear cress) PE=3 SV=1	K	Transcription	basic helix-loop-helix protein-like [Oryza sativa Japonica Group]
Os09g0510000	--	--	--	--	--	--	Cysteine-rich TM module stress tolerance	--	--	--	--
Os09g0498700	--	--	--	--	--	--	F-box domain	F-box protein At1g80960 GN=At1g80960 OS=Arabidopsis thaliana (Mouse-ear cress) PE=2 SV=3	R	General function prediction only	hypothetical protein OsJ_29892 [Oryza sativa Japonica Group]
Os09g0482200	--	--	Molecular Function: DNA binding (GO:0003677);; Molecular Function: aspartic-type endopeptidase activity (GO:0004190);; Biological Process: proteolysis (GO:0006508);; Cellular Component: apoplast (GO:0048046);;	--	[O]	Posttranslational modification, protein turnover, chaperones	Xylanase inhibitor N-terminal;; Xylanase inhibitor C-terminal;; Eukaryotic aspartyl protease	Protein ASPARTIC PROTEASE IN GUARD CELL 1 (Precursor) GN=ASPG1 OS=Arabidopsis thaliana (Mouse-ear cress) PE=1 SV=1	O	Posttranslational modification, protein turnover, chaperones	Os09g0482200 [Oryza sativa Japonica Group]
Os09g0487600	[M]	Cell wall/membrane/envelope biogenesis	Molecular Function: polygalacturonase activity (GO:0004650);; Cellular Component: extracellular region (GO:0005576);; Cellular Component: vacuolar membrane (GO:0005774);; Cellular Component: plasma membrane (GO:0005886);; Biological Process: carbohydrate metabolic process (GO:0005975);; Cellular Component: cytoplasmic membrane-bounded vesicle (GO:0016023);;	--	--	--	Glycosyl hydrolases family 28;; Pectate lyase superfamily protein;; Right handed beta helix region	Probable polygalacturonase OS=Vitis vinifera (Grape) PE=1 SV=1	R	General function prediction only	hypothetical protein OsI_31840 [Oryza sativa Indica Group]
Os06g0564800	[M]	Cell wall/membrane/envelope biogenesis	Cellular Component: mitochondrion (GO:0005739);; Biological Process: sterol biosynthetic process (GO:0016126);; Molecular Function: transferase activity, transferring glycosyl groups (GO:0016757);; Biological Process: cellulose biosynthetic process (GO:0030244);; Biological Process: sphingoid biosynthetic process (GO:0046520);; Biological Process: Golgi vesicle transport (GO:0048193);;	K03842|1.69965e-72|dosa:Os06t0564800-01|Os06g0564800; Similar to beta-1,4-mannosyltransferase.; K03842 beta-1,4-mannosyltransferase [EC:2.4.1.142] (A)	[O]	Posttranslational modification, protein turnover, chaperones	Glycosyl transferases group 1	--	M	Cell wall/membrane/envelope biogenesis	hypothetical protein OsI_23401 [Oryza sativa Indica Group]
Os09g0499450	--	--	--	--	--	--	Domain of unknown function (DUF2828)	--	S	Function unknown	hypothetical protein OsJ_29896 [Oryza sativa Japonica Group]
Os09g0507600	--	--	Cellular Component: endoplasmic reticulum membrane (GO:0005789);; Cellular Component: Golgi apparatus (GO:0005794);; Biological Process: intracellular protein transport (GO:0006886);; Molecular Function: protein transmembrane transporter activity (GO:0008320);; Cellular Component: integral component of membrane (GO:0016021);; Cellular Component: ER to Golgi transport vesicle (GO:0030134);; Biolog…	--	[U]	Intracellular trafficking, secretion, and vesicular transport	emp24/gp25L/p24 family/GOLD	Transmembrane emp24 domain-containing protein p24beta2 (Precursor) GN=At3g07680 OS=Arabidopsis thaliana (Mouse-ear cress) PE=1 SV=1	U	Intracellular trafficking, secretion, and vesicular transport	hypothetical protein OsJ_29951 [Oryza sativa Japonica Group]
Os06g0624750	--	--	--	--	[S]	Function unknown	--	--	S	Function unknown	hypothetical protein OsJ_22025 [Oryza sativa Japonica Group]
Os09g0504800	--	--	--	K15326|0|osa:4347501|Os09g0504800; K15326 tRNA-splicing endonuclease subunit Sen54 (A)	[J]	Translation, ribosomal structure and biogenesis	tRNA-splicing endonuclease subunit sen54 N-term	--	J	Translation, ribosomal structure and biogenesis	Os09g0504800 [Oryza sativa Japonica Group]
Os09g0487200	--	--	--	--	--	--	--	--	S	Function unknown	Os09g0487200 [Oryza sativa Japonica Group]
Os06g0622800	[R]	General function prediction only	Molecular Function: ARF guanyl-nucleotide exchange factor activity (GO:0005086);; Cellular Component: chloroplast (GO:0009507);; Biological Process: regulation of ARF protein signal transduction (GO:0032012);;	--	[U]	Intracellular trafficking, secretion, and vesicular transport	Domain of unknown function (DUF1981)	Brefeldin A-inhibited guanine nucleotide-exchange protein 1 GN=BIG1 OS=Arabidopsis thaliana (Mouse-ear cress) PE=2 SV=1	R	General function prediction only	putative guanine nucleotide-exchange protein GEP2 [Oryza sativa Japonica Group]
Os06g0618000	--	--	Cellular Component: nucleus (GO:0005634);; Biological Process: DNA repair (GO:0006281);; Cellular Component: Smc5-Smc6 complex (GO:0030915);;	--	[S]	Function unknown	Nse4 C-terminal	Non-structural maintenance of chromosomes element 4 homolog A GN=NSE4A OS=Arabidopsis thaliana (Mouse-ear cress) PE=2 SV=1	S	Function unknown	Os06g0618000 [Oryza sativa Japonica Group]
Os09g0482400	[O]	Posttranslational modification, protein turnover, chaperones	Molecular Function: ATP binding (GO:0005524);; Cellular Component: cell wall (GO:0005618);; Cellular Component: nucleolus (GO:0005730);; Cellular Component: mitochondrion (GO:0005739);; Cellular Component: cytosol (GO:0005829);; Cellular Component: plasma membrane (GO:0005886);; Biological Process: protein folding (GO:0006457);; Biological Process: defense response (GO:0006952);; Biological Proce…	K04079|0|osa:9267802|Os09g0482610; K04079 molecular chaperone HtpG (A)	[O]	Posttranslational modification, protein turnover, chaperones	Hsp90 protein;; Histidine kinase-, DNA gyrase B-, and HSP90-like ATPase;; Histidine kinase-, DNA gyrase B-, and HSP90-like ATPase	Heat shock protein 81-3 GN=P0463D04.35 OS=Oryza sativa subsp. japonica (Rice) PE=2 SV=2	O	Posttranslational modification, protein turnover, chaperones	Os09g0482400 [Oryza sativa Japonica Group]
Os06g0625900	[P]	Inorganic ion transport and metabolism	Cellular Component: vacuolar membrane (GO:0005774);; Molecular Function: potassium ion transmembrane transporter activity (GO:0015079);; Cellular Component: integral component of membrane (GO:0016021);; Biological Process: potassium ion transmembrane transport (GO:0071805);;	K03549|0|osa:4341573|Os06g0625900; K03549 KUP system potassium uptake protein (A)	--	--	K+ potassium transporter	Potassium transporter 10 GN=OSJNBa0072A21.17 OS=Oryza sativa subsp. japonica (Rice) PE=2 SV=1	P	Inorganic ion transport and metabolism	Os06g0625900 [Oryza sativa Japonica Group]
Os09g0502566	--	--	Cellular Component: mitochondrion (GO:0005739);;	--	--	--	--	--	--	--	hypothetical protein OsJ_29914 [Oryza sativa Japonica Group]
Os06g0530200	--	--	Cellular Component: plastid (GO:0009536);;	--	--	--	--	--	S	Function unknown	Os06g0530200 [Oryza sativa Japonica Group]
Os06g0625733	--	--	Cellular Component: Golgi membrane (GO:0000139);; Biological Process: calcium ion transport (GO:0006816);; Biological Process: Golgi organization (GO:0007030);; Biological Process: DNA mediated transformation (GO:0009294);; Biological Process: response to bacterium (GO:0009617);; Biological Process: response to salt stress (GO:0009651);; Biological Process: cytokinin-activated signaling pathway (…	K13680|2.36115e-64|dosa:Os06t0625700-01|Os06g0625700; Glycosyl transferase, family 2 domain containing protein.; K13680 beta-mannan synthase [EC:2.4.1.32] (A)	--	--	--	Probable mannan synthase 9 OS=Oryza sativa subsp. japonica (Rice) PE=2 SV=1	R	General function prediction only	RecName: Full=Probable mannan synthase 9; AltName: Full=Cellulose synthase-like protein A9; AltName: Full=OsCslA9 [Oryza sativa Japonica Group]
Os06g0625800	--	--	Cellular Component: mitochondrion (GO:0005739);;	--	[R]	General function prediction only	PPR repeat family;; PPR repeat;; PPR repeat;; Pentatricopeptide repeat domain	Pentatricopeptide repeat-containing protein At4g16470 OS=Arabidopsis thaliana (Mouse-ear cress) PE=2 SV=2	R	General function prediction only	Os06g0625800 [Oryza sativa Japonica Group]
Os09g0516700	--	--	--	--	--	--	Plant protein of unknown function (DUF936)	--	S	Function unknown	Os09g0516700 [Oryza sativa Japonica Group]
Os09g0486375	--	--	Cellular Component: plastid (GO:0009536);;	--	--	--	--	--	--	--	hypothetical protein LOC_Os10g25800 [Oryza sativa Japonica Group]
Os06g0623300	[MG]	--	Molecular Function: catalytic activity (GO:0003824);; Biological Process: cellular metabolic process (GO:0044237);; Molecular Function: coenzyme binding (GO:0050662);;	--	[V]	Defense mechanisms	NAD dependent epimerase/dehydratase family;; 3-beta hydroxysteroid dehydrogenase/isomerase family;; NADH(P)-binding;; Male sterility protein;; KR domain;; short chain dehydrogenase;; Polysaccharide biosynthesis protein;; NmrA-like family	Cinnamoyl-CoA reductase 2 GN=CCR2 OS=Arabidopsis thaliana (Mouse-ear cress) PE=1 SV=1	V	Defense mechanisms	Os06g0623300 [Oryza sativa Japonica Group]
Os09g0491100	[G]	Carbohydrate transport and metabolism	Cellular Component: mitochondrion (GO:0005739);; Biological Process: carbohydrate metabolic process (GO:0005975);; Molecular Function: beta-glucosidase activity (GO:0008422);; Cellular Component: plant-type cell wall (GO:0009505);; Biological Process: pollen tube growth (GO:0009860);; Cellular Component: cytoplasmic membrane-bounded vesicle (GO:0016023);;	K01188|0|osa:4347441|Os09g0491100; K01188 beta-glucosidase [EC:3.2.1.21] (A)	[G]	Carbohydrate transport and metabolism	Glycosyl hydrolase family 1	Beta-glucosidase 30 (Precursor) GN=BGLU30 OS=Oryza sativa subsp. japonica (Rice) PE=2 SV=1	G	Carbohydrate transport and metabolism	Os09g0491100 [Oryza sativa Japonica Group]
Os09g0502100	--	--	--	--	--	--	--	--	S	Function unknown	Os09g0502100 [Oryza sativa Japonica Group]
Os09g0497000	--	--	Molecular Function: transporter activity (GO:0005215);; Cellular Component: mitochondrial inner membrane (GO:0005743);; Biological Process: mitochondrial transport (GO:0006839);; Cellular Component: integral component of membrane (GO:0016021);; Biological Process: transmembrane transport (GO:0055085);;	--	[C]	Energy production and conversion	Mitochondrial carrier protein	Probable mitochondrial adenine nucleotide transporter BTL1 GN=At3g20240 OS=Arabidopsis thaliana (Mouse-ear cress) PE=2 SV=1	C	Energy production and conversion	Os09g0497000 [Oryza sativa Japonica Group]
Os06g0625200	[RTKL]	--	Molecular Function: protein kinase activity (GO:0004672);; Molecular Function: ATP binding (GO:0005524);; Biological Process: protein phosphorylation (GO:0006468);;	--	--	--	Protein kinase domain;; Protein tyrosine kinase	LysM domain receptor-like kinase 4 (Precursor) GN=LYK4 OS=Arabidopsis thaliana (Mouse-ear cress) PE=1 SV=1	T	Signal transduction mechanisms	Os06g0625200 [Oryza sativa Japonica Group]
Os09g0494300	--	--	Molecular Function: DNA binding (GO:0003677);; Cellular Component: nucleus (GO:0005634);; Molecular Function: zinc ion binding (GO:0008270);;	--	[KB]	--	CW-type Zinc Finger;; Methyl-CpG binding domain	Methyl-CpG-binding domain-containing protein 2 GN=MBD2 OS=Arabidopsis thaliana (Mouse-ear cress) PE=1 SV=1	BK	--	Os09g0494300 [Oryza sativa Japonica Group]
Os09g0500900	--	--	Cellular Component: integral component of membrane (GO:0016021);; Cellular Component: cytoplasmic membrane-bounded vesicle (GO:0016023);;	--	[T]	Signal transduction mechanisms	Protein of unknown function (DUF568);; Eukaryotic cytochrome b561	Cytochrome b561 and DOMON domain-containing protein At5g47530 (Precursor) GN=At5g47530 OS=Arabidopsis thaliana (Mouse-ear cress) PE=2 SV=1	T	Signal transduction mechanisms	hypothetical protein OsI_31919 [Oryza sativa Indica Group]
Os09g0514550	--	--	Biological Process: chromatin silencing (GO:0006342);; Biological Process: regulation of flower development (GO:0009909);; Biological Process: histone H3-K9 methylation (GO:0051567);;	--	--	--	--	--	S	Function unknown	hypothetical protein OsJ_29999 [Oryza sativa Japonica Group]
Os06g0572350	--	--	Cellular Component: extracellular space (GO:0005615);; Molecular Function: UDP-N-acetylmuramate dehydrogenase activity (GO:0008762);; Biological Process: cytokinin metabolic process (GO:0009690);; Molecular Function: cytokinin dehydrogenase activity (GO:0019139);; Molecular Function: flavin adenine dinucleotide binding (GO:0050660);; Biological Process: oxidation-reduction process (GO:0055114);;	--	[C]	Energy production and conversion	--	Cytokinin dehydrogenase 10 (Precursor) OS=Oryza sativa subsp. japonica (Rice) PE=3 SV=1	C	Energy production and conversion	hypothetical protein OsJ_21758 [Oryza sativa Japonica Group]
Os09g0500100	--	--	Cellular Component: mitochondrion (GO:0005739);;	--	--	--	--	--	S	Function unknown	Os09g0500100 [Oryza sativa Japonica Group]
Os06g0565000	--	--	Cellular Component: mitochondrion (GO:0005739);;	K17710|0|dosa:Os06t0565000-00|Os06g0565000; Hypothetical conserved gene.; K17710 pentatricopeptide repeat domain-containing protein 1 (A)	[R]	General function prediction only	PPR repeat family;; PPR repeat;; PPR repeat;; Pentatricopeptide repeat domain;; Tetratricopeptide repeat;; Tetratricopeptide repeat;; Replication factor C C-terminal domain;; Mitochondrial 28S ribosomal protein S27;; Region in Clathrin and VPS	Putative pentatricopeptide repeat-containing protein At2g02150 GN=At2g02150 OS=Arabidopsis thaliana (Mouse-ear cress) PE=3 SV=1	R	General function prediction only	Os06g0565000 [Oryza sativa Japonica Group]
Os09g0491238	--	--	Cellular Component: mitochondrion (GO:0005739);; Biological Process: carbohydrate metabolic process (GO:0005975);; Molecular Function: beta-glucosidase activity (GO:0008422);; Cellular Component: plant-type cell wall (GO:0009505);; Biological Process: pollen tube growth (GO:0009860);; Cellular Component: cytoplasmic membrane-bounded vesicle (GO:0016023);;	--	[G]	Carbohydrate transport and metabolism	--	Beta-glucosidase 30 (Precursor) GN=BGLU30 OS=Oryza sativa subsp. japonica (Rice) PE=2 SV=1	G	Carbohydrate transport and metabolism	beta-glucosidase isozyme 2 precursor [Oryza sativa Japonica Group]
Os09g0482300	--	--	Molecular Function: ATP binding (GO:0005524);; Cellular Component: cell wall (GO:0005618);; Cellular Component: nucleolus (GO:0005730);; Cellular Component: mitochondrion (GO:0005739);; Cellular Component: cytosol (GO:0005829);; Cellular Component: plasma membrane (GO:0005886);; Biological Process: protein folding (GO:0006457);; Biological Process: defense response (GO:0006952);; Biological Proce…	--	--	--	Late embryogenesis abundant protein 18	--	O	Posttranslational modification, protein turnover, chaperones	hypothetical protein OsJ_29787 [Oryza sativa Japonica Group]
Os06g0618050	--	--	Cellular Component: nucleus (GO:0005634);; Biological Process: DNA repair (GO:0006281);; Cellular Component: Smc5-Smc6 complex (GO:0030915);;	--	[S]	Function unknown	--	Non-structural maintenance of chromosomes element 4 homolog A GN=NSE4A OS=Arabidopsis thaliana (Mouse-ear cress) PE=2 SV=1	S	Function unknown	hypothetical protein OsI_23710 [Oryza sativa Indica Group]
Os09g0507350	[Q]	Secondary metabolites biosynthesis, transport and catabolism	Molecular Function: copper ion binding (GO:0005507);; Cellular Component: extracellular region (GO:0005576);; Molecular Function: oxidoreductase activity (GO:0016491);; Biological Process: oxidation-reduction process (GO:0055114);;	--	[Q]	Secondary metabolites biosynthesis, transport and catabolism	Multicopper oxidase;; Multicopper oxidase	L-ascorbate oxidase (Precursor) OS=Cucumis sativus (Cucumber) PE=1 SV=1	Q	Secondary metabolites biosynthesis, transport and catabolism	Os09g0507300 [Oryza sativa Japonica Group]
Os09g0506700	--	--	Cellular Component: mitochondrion (GO:0005739);; Cellular Component: cytoplasmic membrane-bounded vesicle (GO:0016023);;	--	--	--	F-box domain	--	R	General function prediction only	hypothetical protein OsJ_29941 [Oryza sativa Japonica Group]
Os09g0494200	[R]	General function prediction only	Molecular Function: chitinase activity (GO:0004568);; Cellular Component: plasma membrane (GO:0005886);; Biological Process: chitin catabolic process (GO:0006032);; Biological Process: response to heat (GO:0009408);; Biological Process: response to water deprivation (GO:0009414);; Biological Process: response to salt stress (GO:0009651);; Biological Process: response to cytokinin (GO:0009735);; B…	--	[R]	General function prediction only	Chitinase class I	Chitinase-like protein 1 (Precursor) GN=At1g05850 OS=Arabidopsis thaliana (Mouse-ear cress) PE=1 SV=1	R	General function prediction only	Os09g0494200 [Oryza sativa Japonica Group]
Os06g0576600	--	--	--	--	--	--	Myb/SANT-like DNA-binding domain	--	S	Function unknown	transposon protein, putative, CACTA, En/Spm sub-class [Oryza sativa Japonica Group]
Os09g0490400	[G]	Carbohydrate transport and metabolism	Cellular Component: mitochondrion (GO:0005739);; Biological Process: carbohydrate metabolic process (GO:0005975);; Molecular Function: beta-glucosidase activity (GO:0008422);; Cellular Component: plant-type cell wall (GO:0009505);; Biological Process: pollen tube growth (GO:0009860);; Cellular Component: cytoplasmic membrane-bounded vesicle (GO:0016023);;	K01188|0|dosa:Os09t0490400-00|Os09g0490400; Beta-glucosidase 29.; K01188 beta-glucosidase [EC:3.2.1.21] (A)	[G]	Carbohydrate transport and metabolism	Glycosyl hydrolase family 1	Beta-glucosidase 29 (Precursor) GN=OsJ_29835 OS=Oryza sativa subsp. japonica (Rice) PE=2 SV=2	G	Carbohydrate transport and metabolism	RecName: Full=Beta-glucosidase 29; Short=Os9bglu29; Flags: Precursor [Oryza sativa Japonica Group]
Os09g0483500	--	--	Molecular Function: calcium ion binding (GO:0005509);;	--	--	--	EF-hand domain pair;; EF hand;; EF hand;; EF-hand domain	--	R	General function prediction only	Os09g0483500 [Oryza sativa Japonica Group]
Os09g0507800	[J]	Translation, ribosomal structure and biogenesis	Molecular Function: structural constituent of ribosome (GO:0003735);; Cellular Component: nucleolus (GO:0005730);; Cellular Component: plasma membrane (GO:0005886);; Biological Process: translation (GO:0006412);; Cellular Component: chloroplast (GO:0009507);; Cellular Component: cytosolic large ribosomal subunit (GO:0022625);; Biological Process: ribosome biogenesis (GO:0042254);;	K02936|3.79476e-148|osa:4347522|Os09g0507800; K02936 large subunit ribosomal protein L7Ae (A)	[J]	Translation, ribosomal structure and biogenesis	Ribosomal protein L7Ae/L30e/S12e/Gadd45 family	60S ribosomal protein L7a OS=Oryza sativa subsp. japonica (Rice) PE=2 SV=1	J	Translation, ribosomal structure and biogenesis	Os08g0326400 [Oryza sativa Japonica Group]
Os09g0495100	--	--	Biological Process: cation transport (GO:0006812);; Molecular Function: solute:proton antiporter activity (GO:0015299);; Cellular Component: integral component of membrane (GO:0016021);; Biological Process: transmembrane transport (GO:0055085);;	--	[P]	Inorganic ion transport and metabolism	--	Cation/H(+) antiporter 15 GN=CHX15 OS=Arabidopsis thaliana (Mouse-ear cress) PE=2 SV=1	P	Inorganic ion transport and metabolism	hypothetical protein [Oryza sativa Japonica Group]
Os09g0500300	[T]	Signal transduction mechanisms	Cellular Component: nucleus (GO:0005634);; Biological Process: response to nutrient (GO:0007584);; Cellular Component: plastid (GO:0009536);; Biological Process: response to wounding (GO:0009611);; Biological Process: response to blue light (GO:0009637);; Biological Process: response to abscisic acid (GO:0009737);; Biological Process: phloem or xylem histogenesis (GO:0010087);; Biological Process…	--	[U]	Intracellular trafficking, secretion, and vesicular transport	Endonuclease/Exonuclease/phosphatase family	Type I inositol 1,4,5-trisphosphate 5-phosphatase 12 GN=F6E13.3 OS=Arabidopsis thaliana (Mouse-ear cress) PE=1 SV=1	U	Intracellular trafficking, secretion, and vesicular transport	Os09g0500300 [Oryza sativa Japonica Group]
Os06g0563900	[I]	Lipid transport and metabolism	Molecular Function: diacylglycerol O-acyltransferase activity (GO:0004144);; Cellular Component: endoplasmic reticulum membrane (GO:0005789);; Biological Process: carbohydrate metabolic process (GO:0005975);; Biological Process: aging (GO:0007568);; Biological Process: circadian rhythm (GO:0007623);; Biological Process: response to cold (GO:0009409);; Biological Process: response to salt stress (…	K11155|0|dosa:Os06t0563900-01|Os06g0563900; Similar to Diacylglycerol acyltransferase.; K11155 diacylglycerol O-acyltransferase 1 [EC:2.3.1.20 2.3.1.75 2.3.1.76] (A)	[I]	Lipid transport and metabolism	MBOAT, membrane-bound O-acyltransferase family	Diacylglycerol O-acyltransferase 1 GN=F3P11.5 OS=Arabidopsis thaliana (Mouse-ear cress) PE=1 SV=2	I	Lipid transport and metabolism	putative acyl-CoA:diacylglycerol acyltransferase [Oryza sativa Japonica Group]
Os09g0505850	--	--	Molecular Function: uridine kinase activity (GO:0004849);; Molecular Function: ATP binding (GO:0005524);; Biological Process: phosphorylation (GO:0016310);; Molecular Function: phosphotransferase activity, alcohol group as acceptor (GO:0016773);; Biological Process: UMP salvage (GO:0044206);; Biological Process: CTP salvage (GO:0044211);;	--	[TZ]	--	--	Putative uracil phosphoribosyltransferase GN=M3E9.60 OS=Arabidopsis thaliana (Mouse-ear cress) PE=2 SV=2	F	Nucleotide transport and metabolism	Ribulose-phosphate 3-epimerase, cytoplasmic isoform [Aegilops tauschii]
Os09g0492800	--	--	Molecular Function: zinc ion binding (GO:0008270);; Molecular Function: protein-disulfide reductase activity (GO:0047134);; Biological Process: oxidation-reduction process (GO:0055114);;	--	--	--	C1 domain;; Phorbol esters/diacylglycerol binding domain (C1 domain);; C1-like domain	--	R	General function prediction only	hypothetical protein OsI_31875 [Oryza sativa Indica Group]
Os09g0501200	[J]	Translation, ribosomal structure and biogenesis	Molecular Function: structural constituent of ribosome (GO:0003735);; Cellular Component: nucleolus (GO:0005730);; Cellular Component: mitochondrion (GO:0005739);; Biological Process: translation (GO:0006412);; Cellular Component: plastid (GO:0009536);; Cellular Component: cytosolic large ribosomal subunit (GO:0022625);;	K02912|3.14617e-83|osa:9268508|Os09g0501100; K02912 large subunit ribosomal protein L32e (A)	[J]	Translation, ribosomal structure and biogenesis	Ribosomal protein L32	60S ribosomal protein L32-1 GN=RPL32A OS=Arabidopsis thaliana (Mouse-ear cress) PE=2 SV=2	J	Translation, ribosomal structure and biogenesis	Os09g0501100 [Oryza sativa Japonica Group]
Os09g0485800	--	--	Cellular Component: plastid (GO:0009536);;	--	--	--	--	--	S	Function unknown	Os09g0485800 [Oryza sativa Japonica Group]
Os06g0618100	--	--	Molecular Function: DNA binding (GO:0003677);; Molecular Function: RNA binding (GO:0003723);; Molecular Function: metal ion binding (GO:0046872);;	--	[R]	General function prediction only	Zinc finger C-x8-C-x5-C-x3-H type (and similar);; KH domain;; Zinc finger C-x8-C-x5-C-x3-H type;; KH domain	Zinc finger CCCH domain-containing protein 44 OS=Oryza sativa subsp. japonica (Rice) PE=2 SV=1	R	General function prediction only	Os06g0618100 [Oryza sativa Japonica Group]
Os09g0507400	--	--	--	--	--	--	--	--	S	Function unknown	Os09g0507400 [Oryza sativa Japonica Group]
Os09g0497600	--	--	--	--	--	--	F-box domain;; F-box-like	--	R	General function prediction only	Os09g0497600 [Oryza sativa Japonica Group]
Os09g0491660	--	--	Molecular Function: DNA binding (GO:0003677);; Molecular Function: chromatin binding (GO:0003682);;	--	--	--	Myb-like DNA-binding domain	--	K	Transcription	Os09g0491660 [Oryza sativa Japonica Group]
Os09g0504400	[DKL]	--	Biological Process: regulation of cyclin-dependent protein serine/threonine kinase activity (GO:0000079);; Cellular Component: mitochondrion (GO:0005739);; Biological Process: regulation of transcription, DNA-templated (GO:0006355);; Molecular Function: cyclin-dependent protein serine/threonine kinase regulator activity (GO:0016538);; Cellular Component: DNA-directed RNA polymerase II, holoenzyme…	K15161|0|osa:9272663|Os09g0504400; K15161 cyclin C (A)	[K]	Transcription	Cyclin, N-terminal domain;; Transcription factor TFIIB repeat	Cyclin-C1-1 OS=Oryza sativa subsp. japonica (Rice) PE=2 SV=1	D	Cell cycle control, cell division, chromosome partitioning	Os09g0504400 [Oryza sativa Japonica Group]
Os09g0500600	[L]	Replication, recombination and repair	Molecular Function: DNA binding (GO:0003677);; Molecular Function: DNA topoisomerase type I activity (GO:0003917);; Cellular Component: chromosome (GO:0005694);; Biological Process: DNA topological change (GO:0006265);; Biological Process: DNA unwinding involved in DNA replication (GO:0006268);; Cellular Component: plastid (GO:0009536);; Biological Process: photoperiodism, flowering (GO:0048573);;	K03165|0|osa:4347482|Os09g0500600; K03165 DNA topoisomerase III [EC:5.99.1.2] (A)	[L]	Replication, recombination and repair	DNA topoisomerase;; Toprim domain	DNA topoisomerase 3-beta GN=TOP3B OS=Oryza sativa subsp. japonica (Rice) PE=2 SV=1	L	Replication, recombination and repair	Os09g0500600 [Oryza sativa Japonica Group]
Os09g0514700	--	--	Cellular Component: cytosol (GO:0005829);;	--	--	--	--	--	S	Function unknown	hypothetical protein OsJ_30001 [Oryza sativa Japonica Group]
Os06g0574900	--	--	Biological Process: developmental process (GO:0032502);; Biological Process: single-multicellular organism process (GO:0044707);;	--	--	--	--	--	DZ	--	Os06g0574900 [Oryza sativa Japonica Group]
Os09g0491644	--	--	Molecular Function: DNA binding (GO:0003677);; Molecular Function: chromatin binding (GO:0003682);;	--	--	--	--	--	K	Transcription	hypothetical protein OsJ_29843 [Oryza sativa Japonica Group]
Os09g0514100	[E]	Amino acid transport and metabolism	Molecular Function: aspartic-type endopeptidase activity (GO:0004190);; Cellular Component: plastid (GO:0009536);; Cellular Component: integral component of membrane (GO:0016021);; Molecular Function: oxidoreductase activity (GO:0016491);; Biological Process: oxidation-reduction process (GO:0055114);;	--	--	--	FAD dependent oxidoreductase;; FAD binding domain	--	R	General function prediction only	Os09g0514100 [Oryza sativa Japonica Group]
Os06g0575000	[RTKL]	--	Molecular Function: protein serine/threonine kinase activity (GO:0004674);; Molecular Function: ATP binding (GO:0005524);; Biological Process: protein phosphorylation (GO:0006468);; Cellular Component: cytoplasmic membrane-bounded vesicle (GO:0016023);; Biological Process: recognition of pollen (GO:0048544);;	K04733|0|dosa:Os06t0575000-00|Os06g0575000; Similar to D-mannose binding lectin family protein.; K04733 interleukin-1 receptor-associated kinase 4 [EC:2.7.11.1] (A)	--	--	Protein kinase domain;; Protein tyrosine kinase	Putative receptor protein kinase ZmPK1 (Precursor) GN=PK1 OS=Zea mays (Maize) PE=2 SV=2	T	Signal transduction mechanisms	putative receptor-like protein kinase [Oryza sativa Japonica Group]
Os09g0512700	--	--	Cellular Component: mitochondrion (GO:0005739);; Cellular Component: endoplasmic reticulum (GO:0005783);;	K14001|0|osa:4347551|Os09g0512700; K14001 nucleotide exchange factor SIL1 (A)	[O]	Posttranslational modification, protein turnover, chaperones	Nucleotide exchange factor Fes1	--	O	Posttranslational modification, protein turnover, chaperones	Os09g0512700 [Oryza sativa Japonica Group]
Os09g0488800	--	--	Cellular Component: plastid (GO:0009536);;	--	--	--	--	--	S	Function unknown	Os09g0488800 [Oryza sativa Japonica Group]
Os06g0622900	[R]	General function prediction only	Molecular Function: nucleotide binding (GO:0000166);; Molecular Function: nucleic acid binding (GO:0003676);;	--	[R]	General function prediction only	RNA recognition motif. (a.k.a. RRM, RBD, or RNP domain);; RNA recognition motif (a.k.a. RRM, RBD, or RNP domain)	UBP1-associated protein 2C GN=UBA2C OS=Arabidopsis thaliana (Mouse-ear cress) PE=2 SV=1	R	General function prediction only	Os06g0622900 [Oryza sativa Japonica Group]
Os06g0564700	[E]	Amino acid transport and metabolism	Molecular Function: cysteine synthase activity (GO:0004124);; Biological Process: cysteine biosynthetic process from serine (GO:0006535);;	K01738|0|osa:4341322|Os06g0564700; K01738 cysteine synthase A [EC:2.5.1.47] (A)	[E]	Amino acid transport and metabolism	Pyridoxal-phosphate dependent enzyme	Cysteine synthase, chloroplastic/chromoplastic (Precursor) GN=CYSK OS=Spinacia oleracea (Spinach) PE=1 SV=2	E	Amino acid transport and metabolism	Os06g0564700 [Oryza sativa Japonica Group]
Os09g0509500	[R]	General function prediction only	Biological Process: metabolic process (GO:0008152);; Cellular Component: plastoglobule (GO:0010287);; Molecular Function: transferase activity, transferring acyl groups other than amino-acyl groups (GO:0016747);;	--	--	--	Alpha/beta hydrolase family	Acyltransferase-like protein At1g54570, chloroplastic (Precursor) GN=At1g54570 OS=Arabidopsis thaliana (Mouse-ear cress) PE=2 SV=1	R	General function prediction only	hypothetical protein OsI_35049 [Oryza sativa Indica Group]
Os09g0504700	--	--	Molecular Function: zinc ion binding (GO:0008270);; Molecular Function: ligase activity (GO:0016874);;	--	[O]	Posttranslational modification, protein turnover, chaperones	Ring finger domain;; zinc-RING finger domain;; Zinc finger, C3HC4 type (RING finger);; zinc finger of C3HC4-type, RING;; Zinc finger, C3HC4 type (RING finger);; Zinc finger, C3HC4 type (RING finger)	E3 ubiquitin-protein ligase RMA1 GN=RMA1 OS=Arabidopsis thaliana (Mouse-ear cress) PE=1 SV=1	O	Posttranslational modification, protein turnover, chaperones	Os09g0504700 [Oryza sativa Japonica Group]
Os09g0482700	--	--	--	--	--	--	--	--	S	Function unknown	Os09g0482700 [Oryza sativa Japonica Group]
Os06g0567433	[Q]	Secondary metabolites biosynthesis, transport and catabolism	Molecular Function: copper ion binding (GO:0005507);; Cellular Component: extracellular region (GO:0005576);; Cellular Component: plant-type cell wall (GO:0009505);; Cellular Component: cytoplasmic membrane-bounded vesicle (GO:0016023);; Molecular Function: oxidoreductase activity (GO:0016491);; Biological Process: oxidation-reduction process (GO:0055114);;	K00423|0|dosa:Os06t0567200-01|Os06g0567200; Cupredoxin domain containing protein.; K00423 L-ascorbate oxidase [EC:1.10.3.3] (A)	[Q]	Secondary metabolites biosynthesis, transport and catabolism	Multicopper oxidase;; Multicopper oxidase	L-ascorbate oxidase (Precursor) GN=AAO OS=Cucurbita maxima (Pumpkin) PE=1 SV=2	Q	Secondary metabolites biosynthesis, transport and catabolism	putative ascorbate oxidase AO4 [Oryza sativa Japonica Group]
Os06g0624900	--	--	--	--	--	--	PLATZ transcription factor	--	S	Function unknown	hypothetical protein OsJ_22026 [Oryza sativa Japonica Group]
Os09g0490200	--	--	Molecular Function: DNA binding (GO:0003677);; Molecular Function: sequence-specific DNA binding transcription factor activity (GO:0003700);; Cellular Component: nucleus (GO:0005634);; Biological Process: regulation of transcription, DNA-templated (GO:0006355);; Biological Process: regulation of sulfur metabolic process (GO:0042762);;	K14514|0|dosa:Os09t0490200-01|Os09g0490200; Similar to Ethylene signal transcription factor.; K14514 ethylene-insensitive protein 3 (A)	--	--	Ethylene insensitive 3	ETHYLENE INSENSITIVE 3-like 3 protein GN=EIL3 OS=Arabidopsis thaliana (Mouse-ear cress) PE=1 SV=1	K	Transcription	hypothetical protein OsJ_29834 [Oryza sativa Japonica Group]
Os06g0620200	[RTKL]	--	Molecular Function: protein serine/threonine kinase activity (GO:0004674);; Molecular Function: ATP binding (GO:0005524);; Biological Process: protein phosphorylation (GO:0006468);; Cellular Component: cytoplasmic membrane-bounded vesicle (GO:0016023);;	--	--	--	Protein kinase domain;; Protein tyrosine kinase;; D-mannose binding lectin	G-type lectin S-receptor-like serine/threonine-protein kinase RLK1 (Precursor) GN=RLK1 OS=Arabidopsis thaliana (Mouse-ear cress) PE=2 SV=2	T	Signal transduction mechanisms	putative S-receptor kinase [Oryza sativa Japonica Group]
Os06g0625500	[O]	Posttranslational modification, protein turnover, chaperones	Molecular Function: peroxidase activity (GO:0004601);; Cellular Component: plant-type cell wall (GO:0009505);; Cellular Component: chloroplast stroma (GO:0009570);; Cellular Component: thylakoid (GO:0009579);; Biological Process: defense response to bacterium (GO:0042742);; Molecular Function: peroxiredoxin activity (GO:0051920);; Biological Process: oxidation-reduction process (GO:0055114);;	--	[O]	Posttranslational modification, protein turnover, chaperones	Redoxin;; AhpC/TSA family	Peroxiredoxin-2E-1, chloroplastic (Precursor) OS=Oryza sativa subsp. japonica (Rice) PE=2 SV=1	O	Posttranslational modification, protein turnover, chaperones	Os06g0625500 [Oryza sativa Japonica Group]
Os09g0513900	--	--	Molecular Function: DNA binding (GO:0003677);; Cellular Component: mitochondrion (GO:0005739);; Cellular Component: plastid (GO:0009536);; Molecular Function: protein dimerization activity (GO:0046983);;	--	--	--	--	--	L	Replication, recombination and repair	hypothetical protein OsJ_29993 [Oryza sativa Japonica Group]
Os09g0506000	--	--	Molecular Function: acid phosphatase activity (GO:0003993);; Cellular Component: cell wall (GO:0005618);; Cellular Component: cytoplasmic membrane-bounded vesicle (GO:0016023);; Molecular Function: metal ion binding (GO:0046872);;	--	[G]	Carbohydrate transport and metabolism	Iron/zinc purple acid phosphatase-like protein C;; Calcineurin-like phosphoesterase;; Calcineurin-like phosphoesterase superfamily domain	Probable inactive purple acid phosphatase 27 (Precursor) GN=PAP27 OS=Arabidopsis thaliana (Mouse-ear cress) PE=2 SV=1	G	Carbohydrate transport and metabolism	hypothetical protein OsI_31957 [Oryza sativa Indica Group]
Os09g0482100	[O]	Posttranslational modification, protein turnover, chaperones	Molecular Function: ATP binding (GO:0005524);; Cellular Component: cell wall (GO:0005618);; Cellular Component: nucleolus (GO:0005730);; Cellular Component: mitochondrion (GO:0005739);; Cellular Component: cytosol (GO:0005829);; Cellular Component: plasma membrane (GO:0005886);; Biological Process: protein folding (GO:0006457);; Biological Process: defense response (GO:0006952);; Biological Proce…	K04079|0|osa:4347402|Os09g0482100; K04079 molecular chaperone HtpG (A)	[O]	Posttranslational modification, protein turnover, chaperones	Hsp90 protein;; Histidine kinase-, DNA gyrase B-, and HSP90-like ATPase;; Histidine kinase-, DNA gyrase B-, and HSP90-like ATPase	Heat shock protein 81-2 OS=Oryza sativa subsp. japonica (Rice) PE=2 SV=1	O	Posttranslational modification, protein turnover, chaperones	heat shock protein 90 [Oryza sativa Japonica Group]
Os09g0486700	[RTKL]	--	Molecular Function: protein serine/threonine kinase activity (GO:0004674);; Molecular Function: ATP binding (GO:0005524);; Biological Process: protein phosphorylation (GO:0006468);;	--	[R]	General function prediction only	Protein kinase domain;; Protein tyrosine kinase	Serine/threonine-protein kinase UCNL {ECO:0000305} OS=Arabidopsis thaliana (Mouse-ear cress) PE=2 SV=1	T	Signal transduction mechanisms	Os09g0486700 [Oryza sativa Japonica Group]
Os06g0627001	--	--	--	--	--	--	--	--	--	--	hypothetical protein [Oryza sativa Indica Group]
Os06g0574700	--	--	Molecular Function: protein serine/threonine kinase activity (GO:0004674);; Molecular Function: ATP binding (GO:0005524);; Cellular Component: mitochondrion (GO:0005739);; Biological Process: protein phosphorylation (GO:0006468);; Cellular Component: cytoplasmic membrane-bounded vesicle (GO:0016023);; Biological Process: recognition of pollen (GO:0048544);;	--	--	--	--	--	T	Signal transduction mechanisms	hypothetical protein OsJ_21772 [Oryza sativa Japonica Group]
Os06g0574550	[RTKL]	--	Molecular Function: protein serine/threonine kinase activity (GO:0004674);; Molecular Function: ATP binding (GO:0005524);; Biological Process: protein phosphorylation (GO:0006468);; Cellular Component: cytoplasmic membrane-bounded vesicle (GO:0016023);; Biological Process: recognition of pollen (GO:0048544);;	--	--	--	Protein kinase domain;; Protein tyrosine kinase;; S-locus glycoprotein family	Putative receptor protein kinase ZmPK1 (Precursor) GN=PK1 OS=Zea mays (Maize) PE=2 SV=2	T	Signal transduction mechanisms	putative Ser/Thr protein kinase [Oryza sativa Japonica Group]
Os06g0581300	--	--	Cellular Component: vacuole (GO:0005773);; Cellular Component: membrane (GO:0016020);; Cellular Component: cytoplasmic membrane-bounded vesicle (GO:0016023);;	--	--	--	Protein of unknown function (DUF1475);; Protein of unknown function (DUF2644)	--	S	Function unknown	Os06g0581300 [Oryza sativa Japonica Group]
Os09g0489200	--	--	Molecular Function: sequence-specific DNA binding transcription factor activity (GO:0003700);; Biological Process: regulation of transcription, DNA-templated (GO:0006355);; Biological Process: regulation of circadian rhythm (GO:0042752);;	--	[BT]	--	Cupin-like domain;; Cupin superfamily protein;; JmjC domain, hydroxylase	Putative lysine-specific demethylase JMJD5 GN=MOE17.12 OS=Arabidopsis thaliana (Mouse-ear cress) PE=2 SV=1	BT	--	hypothetical protein OsI_31847 [Oryza sativa Indica Group]
Os06g0521000	--	--	Molecular Function: chromatin binding (GO:0003682);; Cellular Component: ribosome (GO:0005840);;	--	--	--	No apical meristem-associated C-terminal domain;; Myb/SANT-like DNA-binding domain	Glutathione S-transferase T3 GN=K1O13.1 OS=Arabidopsis thaliana (Mouse-ear cress) PE=2 SV=1	S	Function unknown	Os06g0521000 [Oryza sativa Japonica Group]
Os06g0625700	[M]	Cell wall/membrane/envelope biogenesis	Cellular Component: Golgi membrane (GO:0000139);; Cellular Component: integral component of membrane (GO:0016021);; Molecular Function: transferase activity, transferring glycosyl groups (GO:0016757);;	K13680|0|dosa:Os06t0625700-01|Os06g0625700; Glycosyl transferase, family 2 domain containing protein.; K13680 beta-mannan synthase [EC:2.4.1.32] (A)	--	--	Glycosyltransferase like family 2;; Glycosyl transferase family group 2;; Glycosyl transferase family 2;; Glycosyl transferase family 21	Probable mannan synthase 9 OS=Oryza sativa subsp. japonica (Rice) PE=2 SV=1	R	General function prediction only	RecName: Full=Probable mannan synthase 9; AltName: Full=Cellulose synthase-like protein A9; AltName: Full=OsCslA9 [Oryza sativa Japonica Group]
Os09g0510200	--	--	--	--	[K]	Transcription	Protein of unknown function (DUF667)	Cilia- and flagella-associated protein 20 GN=CFAP20 OS=Chlamydomonas reinhardtii (Chlamydomonas smithii) PE=1 SV=1	K	Transcription	Os09g0510200 [Oryza sativa Japonica Group]
Os06g0530300	[S]	Function unknown	Cellular Component: plastid (GO:0009536);;	--	--	--	Divergent PAP2 family	--	S	Function unknown	Os06g0530300 [Oryza sativa Japonica Group]
Os09g0482860	--	--	Biological Process: metabolic process (GO:0008152);; Cellular Component: cytoplasmic membrane-bounded vesicle (GO:0016023);; Molecular Function: transferase activity, transferring hexosyl groups (GO:0016758);;	--	[GC]	--	--	Anthocyanidin 5,3-O-glucosyltransferase GN=RhGT1 OS=Rosa hybrid cultivar PE=2 SV=1	CG	--	unnamed protein product [Oryza sativa Japonica Group]
Os09g0482660	[O]	Posttranslational modification, protein turnover, chaperones	Molecular Function: serine-type endopeptidase activity (GO:0004252);; Cellular Component: cell wall (GO:0005618);; Biological Process: proteolysis (GO:0006508);; Cellular Component: cytoplasmic membrane-bounded vesicle (GO:0016023);; Molecular Function: identical protein binding (GO:0042802);; Biological Process: negative regulation of catalytic activity (GO:0043086);; Cellular Component: apoplas…	--	--	--	Subtilase family;; PA domain	CO(2)-response secreted protease {ECO:0000303|PubMed:25043023} (Precursor) OS=Arabidopsis thaliana (Mouse-ear cress) PE=2 SV=1	O	Posttranslational modification, protein turnover, chaperones	Os09g0482660 [Oryza sativa Japonica Group]
Os06g0524900	--	--	Biological Process: defense response (GO:0006952);; Molecular Function: ADP binding (GO:0043531);;	--	[T]	Signal transduction mechanisms	NB-ARC domain	Disease resistance protein RPP13 GN=RPP13 OS=Arabidopsis thaliana (Mouse-ear cress) PE=2 SV=2	T	Signal transduction mechanisms	Os06g0524900 [Oryza sativa Japonica Group]
Os09g0511900	[G]	Carbohydrate transport and metabolism	Biological Process: carbohydrate metabolic process (GO:0005975);; Molecular Function: beta-glucosidase activity (GO:0008422);; Cellular Component: cytoplasmic membrane-bounded vesicle (GO:0016023);;	K01188|0|osa:4347547|Os09g0511900; K01188 beta-glucosidase [EC:3.2.1.21] (A)	[G]	Carbohydrate transport and metabolism	Glycosyl hydrolase family 1	Probable inactive beta-glucosidase 33 (Precursor) GN=BGLU33 OS=Oryza sativa subsp. japonica (Rice) PE=2 SV=2	G	Carbohydrate transport and metabolism	Os09g0511900 [Oryza sativa Japonica Group]
Os06g0629362	--	--	Cellular Component: mitochondrion (GO:0005739);;	--	--	--	--	--	--	--	hypothetical protein [Oryza sativa Japonica Group]
Os06g0575900	--	--	Biological Process: defense response (GO:0006952);; Molecular Function: ADP binding (GO:0043531);;	--	--	--	Tryptophan-rich protein (DUF2389)	Disease resistance protein RPM1 GN=F17A9.20 OS=Arabidopsis thaliana (Mouse-ear cress) PE=1 SV=1	T	Signal transduction mechanisms	hypothetical protein OsI_23469 [Oryza sativa Indica Group]
Os06g0620000	--	--	Cellular Component: plastid (GO:0009536);; Cellular Component: cytoplasmic membrane-bounded vesicle (GO:0016023);; Biological Process: L-arabinose metabolic process (GO:0046373);; Molecular Function: alpha-L-arabinofuranosidase activity (GO:0046556);;	--	--	--	--	L-galactono-1,4-lactone dehydrogenase 2, mitochondrial (Precursor) GN=OsJ_35179 OS=Oryza sativa subsp. japonica (Rice) PE=2 SV=1	--	--	Os06g0620000 [Oryza sativa Japonica Group]
Os06g0630300	--	--	--	--	--	--	--	--	S	Function unknown	Os06g0630300 [Oryza sativa Japonica Group]
Os09g0512950	--	--	--	--	--	--	--	--	R	General function prediction only	unnamed protein product [Oryza sativa Japonica Group]
Os06g0566500	--	--	Cellular Component: cytoplasmic membrane-bounded vesicle (GO:0016023);;	--	--	--	Domain of unknown function (DUF4408)	--	S	Function unknown	Os06g0566500 [Oryza sativa Japonica Group]
Os06g0580100	--	--	Cellular Component: membrane (GO:0016020);;	--	--	--	--	--	S	Function unknown	Os06g0580100 [Oryza sativa Japonica Group]
Os09g0499400	--	--	--	--	--	--	Domain of unknown function (DUF2828)	--	S	Function unknown	Os09g0499400 [Oryza sativa Japonica Group]
Os09g0507200	--	--	Biological Process: cell fate specification (GO:0001708);; Molecular Function: DNA binding (GO:0003677);; Molecular Function: sequence-specific DNA binding transcription factor activity (GO:0003700);; Cellular Component: nucleus (GO:0005634);; Biological Process: regulation of transcription, DNA-templated (GO:0006355);; Biological Process: maintenance of floral meristem identity (GO:0010076);; Bi…	--	[K]	Transcription	SRF-type transcription factor (DNA-binding and dimerisation domain);; K-box region	MADS-box transcription factor 8 OS=Oryza sativa subsp. japonica (Rice) PE=1 SV=1	K	Transcription	Os09g0507200 [Oryza sativa Japonica Group]
Os06g0527500	--	--	Molecular Function: intracellular cyclic nucleotide activated cation channel activity (GO:0005221);; Molecular Function: inward rectifier potassium channel activity (GO:0005242);; Cellular Component: plasma membrane (GO:0005886);; Biological Process: potassium ion transport (GO:0006813);; Biological Process: calcium ion transport (GO:0006816);; Biological Process: response to fungus (GO:0009620);…	K05391|2.77485e-29|osa:4341189|Os06g0527100; K05391 cyclic nucleotide gated channel, other eukaryote (A)	[PT]	--	--	Probable cyclic nucleotide-gated ion channel 3 GN=CNGC3 OS=Arabidopsis thaliana (Mouse-ear cress) PE=2 SV=2	P	Inorganic ion transport and metabolism	hypothetical protein OsI_23212 [Oryza sativa Indica Group]
Os09g0516750	--	--	--	--	--	--	Plant protein of unknown function (DUF936)	--	S	Function unknown	hypothetical protein OsJ_30017 [Oryza sativa Japonica Group]
Os06g0618700	--	--	Cellular Component: plastid (GO:0009536);;	--	--	--	VQ motif	--	S	Function unknown	hypothetical protein OsI_23715 [Oryza sativa Indica Group]
Os09g0499300	--	--	--	--	--	--	--	--	S	Function unknown	hypothetical protein OsI_31909 [Oryza sativa Indica Group]
Os06g0565100	[Q]	Secondary metabolites biosynthesis, transport and catabolism	Molecular Function: monooxygenase activity (GO:0004497);; Molecular Function: iron ion binding (GO:0005506);; Molecular Function: electron carrier activity (GO:0009055);; Molecular Function: oxidoreductase activity, acting on paired donors, with incorporation or reduction of molecular oxygen (GO:0016705);; Molecular Function: heme binding (GO:0020037);; Biological Process: oxidation-reduction pro…	K00517|0|osa:4341325|Os06g0565100; K00517 [EC:1.14.-.-] (A)	[Q]	Secondary metabolites biosynthesis, transport and catabolism	Cytochrome P450	Cytochrome P450 711A1 OS=Arabidopsis thaliana (Mouse-ear cress) PE=2 SV=1	Q	Secondary metabolites biosynthesis, transport and catabolism	Os06g0565100 [Oryza sativa Japonica Group]
Os06g0565300	--	--	--	--	--	--	--	--	S	Function unknown	Os06g0565300 [Oryza sativa Japonica Group]
Os06g0579201	--	--	Cellular Component: plastid (GO:0009536);;	--	--	--	--	--	--	--	Os06g0579300 [Oryza sativa Japonica Group]
Os09g0483200	[O]	Posttranslational modification, protein turnover, chaperones	Molecular Function: structural constituent of ribosome (GO:0003735);; Cellular Component: ribosome (GO:0005840);; Biological Process: translation (GO:0006412);;	--	[J]	Translation, ribosomal structure and biogenesis	Ubiquitin family;; Ribosomal L40e family;; Ubiquitin-2 like Rad60 SUMO-like;; Ubiquitin-like domain	40S ribosomal protein S27a-1 (Precursor) OS=Arabidopsis thaliana (Mouse-ear cress) PE=1 SV=2	J	Translation, ribosomal structure and biogenesis	Os09g0483200 [Oryza sativa Japonica Group]
Os06g0627400	--	--	--	--	--	--	--	--	--	--	Os06g0627400 [Oryza sativa Japonica Group]
Os09g0508200	--	--	Cellular Component: cytoplasmic membrane-bounded vesicle (GO:0016023);;	--	--	--	Pollen proteins Ole e I like	Pollen-specific protein-like At4g18596 (Precursor) GN=At4g18596 OS=Arabidopsis thaliana (Mouse-ear cress) PE=2 SV=1	R	General function prediction only	hypothetical protein OsJ_29955 [Oryza sativa Japonica Group]
Os09g0503100	[CR]	--	Molecular Function: nucleotide binding (GO:0000166);; Cellular Component: vacuole (GO:0005773);; Cellular Component: plasma membrane (GO:0005886);; Molecular Function: zinc ion binding (GO:0008270);; Cellular Component: chloroplast thylakoid membrane (GO:0009535);; Cellular Component: chloroplast envelope (GO:0009941);; Molecular Function: oxidoreductase activity (GO:0016491);; Biological Process…	--	[CR]	--	Zinc-binding dehydrogenase;; Alcohol dehydrogenase GroES-like domain;; Zinc-binding dehydrogenase	Putative quinone-oxidoreductase homolog, chloroplastic GN=At4g13010 OS=Arabidopsis thaliana (Mouse-ear cress) PE=2 SV=1	Q	Secondary metabolites biosynthesis, transport and catabolism	hypothetical protein OsI_31936 [Oryza sativa Indica Group]
Os09g0515200	[O]	Posttranslational modification, protein turnover, chaperones	Molecular Function: threonine-type endopeptidase activity (GO:0004298);; Cellular Component: nucleus (GO:0005634);; Cellular Component: proteasome core complex (GO:0005839);; Biological Process: gluconeogenesis (GO:0006094);; Biological Process: glycolytic process (GO:0006096);; Biological Process: fatty acid beta-oxidation (GO:0006635);; Biological Process: toxin catabolic process (GO:0009407);;…	K02736|6.11231e-151|osa:4347573|Os09g0515200; K02736 20S proteasome subunit beta 7 [EC:3.4.25.1] (A)	[O]	Posttranslational modification, protein turnover, chaperones	Proteasome subunit	Proteasome subunit beta type-4 (Precursor) GN=F13N6.3 OS=Arabidopsis thaliana (Mouse-ear cress) PE=1 SV=2	O	Posttranslational modification, protein turnover, chaperones	Os09g0515200 [Oryza sativa Japonica Group]
Os09g0485500	--	--	Molecular Function: nucleic acid binding (GO:0003676);; Cellular Component: nucleus (GO:0005634);; Biological Process: pollen tube growth (GO:0009860);; Molecular Function: metal ion binding (GO:0046872);;	--	[R]	General function prediction only	--	Zinc finger protein WIP2 OS=Arabidopsis thaliana (Mouse-ear cress) PE=1 SV=1	R	General function prediction only	Os09g0485500 [Oryza sativa Japonica Group]
Os09g0514300	--	--	Cellular Component: plastid (GO:0009536);;	--	[R]	General function prediction only	--	--	R	General function prediction only	hypothetical protein OsJ_29997 [Oryza sativa Japonica Group]
Os06g0568400	--	--	--	--	--	--	Domain of unknown function (DUF4228)	--	S	Function unknown	hypothetical protein OsI_23417 [Oryza sativa Indica Group]
Os06g0527100	--	--	Molecular Function: intracellular cyclic nucleotide activated cation channel activity (GO:0005221);; Molecular Function: inward rectifier potassium channel activity (GO:0005242);; Cellular Component: plasma membrane (GO:0005886);; Biological Process: potassium ion transport (GO:0006813);; Biological Process: calcium ion transport (GO:0006816);; Biological Process: response to fungus (GO:0009620);…	K05391|0|osa:4341189|Os06g0527100; K05391 cyclic nucleotide gated channel, other eukaryote (A)	[PT]	--	Ion transport protein;; Cyclic nucleotide-binding domain	Cyclic nucleotide-gated ion channel 1 GN=CNGC1 OS=Arabidopsis thaliana (Mouse-ear cress) PE=1 SV=1	P	Inorganic ion transport and metabolism	Os06g0527100 [Oryza sativa Japonica Group]
Os09g0507550	--	--	Molecular Function: peroxidase activity (GO:0004601);; Biological Process: response to oxidative stress (GO:0006979);; Cellular Component: cytoplasmic membrane-bounded vesicle (GO:0016023);; Molecular Function: heme binding (GO:0020037);; Molecular Function: metal ion binding (GO:0046872);; Biological Process: oxidation-reduction process (GO:0055114);;	K00430|2.37354e-125|osa:4347520|Os09g0507500; K00430 peroxidase [EC:1.11.1.7] (A)	--	--	Peroxidase	Peroxidase 73 (Precursor) GN=K8K14.13 OS=Arabidopsis thaliana (Mouse-ear cress) PE=1 SV=1	G	Carbohydrate transport and metabolism	hypothetical protein OsI_31969 [Oryza sativa Indica Group]
Os06g0530400	--	--	Molecular Function: DNA binding (GO:0003677);; Cellular Component: nucleus (GO:0005634);; Biological Process: regulation of transcription, DNA-templated (GO:0006355);; Biological Process: plant-type secondary cell wall biogenesis (GO:0009834);; Biological Process: positive regulation of cell fate commitment (GO:0010455);; Biological Process: root cap development (GO:0048829);;	--	--	--	No apical meristem (NAM) protein	NAC domain-containing protein 76 OS=Oryza sativa subsp. japonica (Rice) PE=2 SV=2	K	Transcription	putative OsNAC7 protein [Oryza sativa Japonica Group]
Os09g0482681	--	--	Molecular Function: serine-type endopeptidase activity (GO:0004252);; Cellular Component: cell wall (GO:0005618);; Biological Process: proteolysis (GO:0006508);; Cellular Component: cytoplasmic membrane-bounded vesicle (GO:0016023);; Molecular Function: identical protein binding (GO:0042802);; Biological Process: negative regulation of catalytic activity (GO:0043086);; Cellular Component: apoplas…	--	--	--	Subtilase family	CO(2)-response secreted protease {ECO:0000303|PubMed:25043023} (Precursor) OS=Arabidopsis thaliana (Mouse-ear cress) PE=2 SV=1	O	Posttranslational modification, protein turnover, chaperones	Os09g0482660 [Oryza sativa Japonica Group]
Os09g0483100	--	--	Molecular Function: calcium ion binding (GO:0005509);;	--	--	--	EF-hand domain pair;; EF hand;; EF hand;; EF-hand domain;; EF-hand domain pair	--	T	Signal transduction mechanisms	Os09g0483100 [Oryza sativa Japonica Group]
Os06g0574500	[T]	Signal transduction mechanisms	Molecular Function: phosphoprotein phosphatase activity (GO:0004721);; Cellular Component: nucleus (GO:0005634);; Cellular Component: cytoplasm (GO:0005737);; Cellular Component: plasma membrane (GO:0005886);; Molecular Function: metal ion binding (GO:0046872);; Biological Process: regulation of auxin polar transport (GO:2000012);;	K04382|0|osa:4341364|Os06g0574500; K04382 serine/threonine-protein phosphatase 2A catalytic subunit [EC:3.1.3.16] (A)	[T]	Signal transduction mechanisms	Calcineurin-like phosphoesterase	Serine/threonine-protein phosphatase PP2A-1 catalytic subunit OS=Oryza sativa subsp. japonica (Rice) PE=2 SV=1	T	Signal transduction mechanisms	Os06g0574500 [Oryza sativa Japonica Group]
Os09g0501100	--	--	Cellular Component: cytoplasmic membrane-bounded vesicle (GO:0016023);; Cellular Component: anchored component of membrane (GO:0031225);;	--	[T]	Signal transduction mechanisms	Protein of unknown function (DUF568)	Auxin-induced in root cultures protein 12 (Precursor) GN=AIR12 OS=Arabidopsis thaliana (Mouse-ear cress) PE=1 SV=3	T	Signal transduction mechanisms	hypothetical protein OsI_31921 [Oryza sativa Indica Group]
Os06g0521400	--	--	Molecular Function: peroxidase activity (GO:0004601);; Biological Process: response to oxidative stress (GO:0006979);; Cellular Component: cytoplasmic membrane-bounded vesicle (GO:0016023);; Molecular Function: heme binding (GO:0020037);; Molecular Function: metal ion binding (GO:0046872);; Biological Process: oxidation-reduction process (GO:0055114);;	--	--	--	Peroxidase	Peroxidase 4 {ECO:0000250|UniProtKB:Q42578} (Precursor) OS=Vitis vinifera (Grape) PE=1 SV=1	R	General function prediction only	Os06g0521400 [Oryza sativa Japonica Group]
Os09g0502800	--	--	Cellular Component: mitochondrion (GO:0005739);;	--	--	--	--	--	R	General function prediction only	hypothetical protein OsJ_29916 [Oryza sativa Japonica Group]
Os09g0485900	[J]	Translation, ribosomal structure and biogenesis	Molecular Function: structural constituent of ribosome (GO:0003735);; Cellular Component: nucleolus (GO:0005730);; Cellular Component: vacuole (GO:0005773);; Cellular Component: plasma membrane (GO:0005886);; Biological Process: translation (GO:0006412);; Cellular Component: chloroplast envelope (GO:0009941);; Biological Process: adaxial/abaxial pattern specification (GO:0009955);; Molecular Func…	K02940|1.21473e-127|osa:4347422|Os09g0485900; K02940 large subunit ribosomal protein L9e (A)	[J]	Translation, ribosomal structure and biogenesis	Ribosomal protein L6	60S ribosomal protein L9 OS=Oryza sativa subsp. japonica (Rice) PE=2 SV=3	J	Translation, ribosomal structure and biogenesis	Os09g0485900 [Oryza sativa Japonica Group]
Os06g0624000	--	--	--	--	--	--	--	--	--	--	hypothetical protein [Oryza sativa Japonica Group]
Os09g0488700	--	--	--	--	--	--	--	--	S	Function unknown	hypothetical protein OsI_31845 [Oryza sativa Indica Group]
Os09g0494600	--	--	Cellular Component: membrane (GO:0016020);;	--	--	--	Protein of unknown function, DUF599	--	S	Function unknown	Os09g0494600 [Oryza sativa Japonica Group]
Os06g0565200	[K]	Transcription	Molecular Function: sequence-specific DNA binding transcription factor activity (GO:0003700);; Cellular Component: nucleus (GO:0005634);; Cellular Component: cytoplasm (GO:0005737);; Biological Process: regulation of transcription, DNA-templated (GO:0006355);; Biological Process: response to heat (GO:0009408);; Molecular Function: sequence-specific DNA binding (GO:0043565);;	K09419|5.02329e-132|osa:4341326|Os06g0565200; K09419 heat shock transcription factor, other eukaryote (A)	[K]	Transcription	HSF-type DNA-binding	Putative heat stress transcription factor A-6a OS=Oryza sativa subsp. japonica (Rice) PE=3 SV=1	K	Transcription	Os06g0565200 [Oryza sativa Japonica Group]
Os09g0516200	--	--	Molecular Function: sequence-specific DNA binding transcription factor activity (GO:0003700);; Cellular Component: nucleus (GO:0005634);; Biological Process: regulation of transcription, DNA-templated (GO:0006355);; Molecular Function: sequence-specific DNA binding (GO:0043565);;	--	--	--	bZIP transcription factor;; Basic region leucine zipper	Transcription factor RF2a OS=Oryza sativa subsp. japonica (Rice) PE=1 SV=1	K	Transcription	RecName: Full=Transcription factor RF2a [Oryza sativa Japonica Group]
Os09g0492900	--	--	--	--	--	--	Domain of unknown function (DUF4228)	--	S	Function unknown	hypothetical protein OsI_31876 [Oryza sativa Indica Group]
Os06g0581000	--	--	Molecular Function: transporter activity (GO:0005215);; Cellular Component: plasma membrane (GO:0005886);; Biological Process: transport (GO:0006810);; Biological Process: response to nematode (GO:0009624);;	--	[E]	Amino acid transport and metabolism	POT family	Protein NRT1/ PTR FAMILY 4.6 GN=At1g69850 OS=Arabidopsis thaliana (Mouse-ear cress) PE=1 SV=1	P	Inorganic ion transport and metabolism	Os06g0581000 [Oryza sativa Japonica Group]
Os09g0495300	--	--	Cellular Component: mitochondrion (GO:0005739);; Cellular Component: plastid (GO:0009536);;	--	--	--	--	--	S	Function unknown	hypothetical protein OsI_31891 [Oryza sativa Indica Group]
Os06g0526400	--	--	--	K14496|2.85171e-109|dosa:Os06t0526400-00|Os06g0526400; Similar to AT-rich element binding factor 3.; K14496 abscisic acid receptor PYR/PYL family (A)	--	--	Polyketide cyclase / dehydrase and lipid transport	Abscisic acid receptor PYL8 GN=MFH8.10 OS=Arabidopsis thaliana (Mouse-ear cress) PE=1 SV=1	R	General function prediction only	hypothetical protein OsJ_21539 [Oryza sativa Japonica Group]
Os06g0619066	--	--	Molecular Function: transferase activity (GO:0016740);;	--	--	--	--	--	T	Signal transduction mechanisms	hypothetical protein [Oryza sativa Japonica Group]
note: "--" indicates no annotation in database
