# Supplementary material for: Identification of candidate genes controlling chilling tolerance of rice in the cold region at the booting stage by BSA-Seq and RNA-Seq
Source: R Soc Open Sci. 2020 Nov 18;7(11):201081. doi: 10.1098/rsos.201081 (PMC7735347; doi:10.1098/rsos.201081)
Supplement: Table S8 [file rsos201081supp8.xlsx]

## Sheet: Sheet1
Table S8 Gene expression evels after 0, 2, and 4 days of low-temperature treatment in LJ25
Gene ID	25_0(FPKM)	25_2(FPKM)	25_4(FPKM)
Os01g0100100	7.81656	7.86527	7.35221
Os01g0100200	16.3995	10.6283	9.57691
Os01g0100300	0.520286	2.78828	1.89694
Os01g0100466	10.7252	1.84501	6.0017
Os01g0100600	2.72158	4.42036	3.48585
Os01g0100650	9.23032	14.7601	11.8845
Os01g0100700	114.181	105.977	126.487
Os01g0100800	6.4619	5.35021	5.41013
Os01g0100900	12.1061	21.713	9.3343
Os01g0101150	29.6356	14.0791	14.6519
Os01g0101300	9.05119	9.84033	12.054
Os01g0101600	14.0555	14.1449	14.4968
Os01g0102000	27.252	12.6078	27.8607
Os01g0102300	4.33245	16.5898	11.8459
Os01g0102500	12.8037	18.9237	17.8927
Os01g0102600	108.762	63.1897	71.5359
Os01g0102800	3.2593	5.71284	5.64616
Os01g0102850	2.81672	3.47985	3.98531
Os01g0102900	172.289	257.878	163.215
Os01g0103000	20.2376	3.95643	8.86211
Os01g0103075	16.8259	8.52505	13.0407
Os01g0103600	58.6311	31.816	26.6214
Os01g0103650	2.0594	2.09376	1.6627
Os01g0103700	1.64733	2.16879	1.90505
Os01g0103800	21.075	7.02559	13.4334
Os01g0104000	25.7583	16.4391	25.8364
Os01g0104100	22.5595	29.0786	25.4576
Os01g0104400	336.915	378.017	374.133
Os01g0104600	13.2644	12.7175	10.3414
Os01g0104800	6.92808	10.489	10.7578
Os01g0104900	141.967	66.984	82.5569
Os01g0105300	7.6626	6.65476	7.52167
Os01g0105400	39.1697	23.6845	26.5604
Os01g0105800	2.54264	6.30772	6.20123
Os01g0105900	41.8383	77.5459	34.1241
Os01g0106200	198.307	125.273	129.079
Os01g0106300	43.9648	39.2871	31.46
Os01g0106400	152.274	88.3589	103.513
Os01g0106500	22.2808	28.7014	33.2909
Os01g0106600	9.83725	5.50501	4.0215
Os01g0106700	8.50979	8.56073	7.84448
Os01g0106800	171.429	143.53	165.817
Os01g0106900	21.9615	17.0062	14.2508
Os01g0107000	11.0483	21.0936	14.298
Os01g0107700	1.22912	0.584103	1.16185
Os01g0107750	1.8253	0.788806	1.37575
Os01g0107900	11.6938	25.4955	18.1642
Os01g0108000	10.1154	11.4924	8.54277
Os01g0108200	14.6968	12.0756	9.72755
Os01g0108600	17.8337	63.6709	35.7118
Os01g0108800	4.88663	0.879062	1.1232
Os01g0109000	12.7443	10.7553	12.6219
Os01g0109300	12.0938	8.86793	7.87182
Os01g0109432	4.5831	4.96119	4.23822
Os01g0109500	5.15462	1.02148	1.86474
Os01g0109700	17.3157	27.3758	18.1766
Os01g0109750	8.78105	9.73752	7.64617
Os01g0110100	5.3079	6.49857	3.5904
Os01g0110200	151.704	389.902	452.831
Os01g0110400	6.44689	63.4798	24.0612
Os01g0110500	20.4122	7.27685	10.9472
Os01g0110600	1.76169	0.76624	1.33216
Os01g0110700	4.92559	1.3129	1.27822
Os01g0110800	73.1923	22.0896	43.1346
Os01g0111100	20.0521	23.0644	13.2416
Os01g0111200	33.5799	36.1829	40.3233
Os01g0111400	5.73208	7.05988	7.38434
Os01g0111700	0.0705699	4.00061	0.675996
Os01g0111800	113.308	243.485	109.564
Os01g0111900	446.384	1023.84	594.096
Os01g0112000	10.5473	43.6265	27.0505
Os01g0112201	5.88772	6.57591	6.28225
Os01g0112300	90.7859	20.7886	42.5219
Os01g0112500	13.0416	31.3754	19.3344
Os01g0113200	0.568107	5.29114	0.494883
Os01g0113300	0.108738	1.0957	0.117159
Os01g0113400	6.19519	2.50447	3.01546
Os01g0113450	2.68458	2.34346	3.22811
Os01g0113650	1.1474	2.43592	0.749035
Os01g0113700	3.1901	7.41158	2.62099
Os01g0113800	0.843825	4.33953	1.25543
Os01g0114100	5.24323	3.86376	3.06395
Os01g0114300	2.33584	0.665185	1.25412
Os01g0114800	4.21713	2.51855	3.92283
Os01g0115800	1.87417	0.594554	0.970066
Os01g0116600	26.1733	38.6778	48.3977
Os01g0117900	11.8191	42.8753	5.06562
Os01g0118000	123.993	93.967	128.149
Os01g0118100	12.866	21.78	17.3342
Os01g0118300	9.7711	1.36647	3.01141
Os01g0118400	6.31628	110.819	16.3231
Os01g0118600	19.8249	9.6059	7.73487
Os01g0118700	2.83537	53.931	9.93793
Os01g0119000	1.58912	13.3355	11.8626
Os01g0119100	180.073	309.298	205.411
Os01g0119500	38.8384	18.1383	25.0747
Os01g0120300	36.8184	23.7913	23.0753
Os01g0120500	34.0938	25.3571	21.1386
Os01g0120600	4.78874	16.615	8.71723
Os01g0120700	26.2127	37.4386	30.6071
Os01g0120800	59.0554	67.7826	68.4119
Os01g0121100	64.209	123.942	131.113
Os01g0121200	13.7209	3.01252	7.81112
Os01g0121300	11.5577	17.2341	11.3514
Os01g0121400	1.91843	3.34521	2.64625
Os01g0121500	0.146442	4.86335	1.43556
Os01g0121600	15.2887	45.7176	16.9627
Os01g0121800	33.0483	31.815	36.5565
Os01g0121950	8.895	1.14856	1.91689
Os01g0122000	10.4429	12.7972	11.0037
Os01g0122200	7.69064	2.37766	4.87291
Os01g0122367	36.939	14.6286	24.4519
Os01g0123800	1.15272	2.68425	0.787159
Os01g0124100	3.62454	121.676	11.0706
Os01g0124200	101.159	2521.13	371.802
Os01g0124700	0.847603	116.267	23.3151
Os01g0124900	2.91472	2.40023	2.8733
Os01g0125600	116.647	33.3074	79.99
Os01g0125700	6.36813	9.79467	12.4817
Os01g0125800	6.45412	1.55573	2.58189
Os01g0125850	17.3223	2.9043	6.04403
Os01g0125900	8.95319	12.0237	8.67176
Os01g0126100	0.286851	3.10932	0.511132
Os01g0126200	8.20406	1.84948	4.11916
Os01g0126600	6.06711	5.6889	8.94162
Os01g0127300	19.1115	43.3454	26.2238
Os01g0127400	2.26659	3.85282	2.75819
Os01g0127500	221.643	0.296133	33.3625
Os01g0127700	3.96223	11.5083	7.5987
Os01g0127900	2.04105	6.82307	6.09571
Os01g0128200	5.82681	25.6677	4.45316
Os01g0128300	264.376	105.441	77.5094
Os01g0128700	3.56503	3.63938	3.89387
Os01g0128800	15.8239	17.7004	15.6485
Os01g0129200	31.4406	2.22924	9.83525
Os01g0129500	9.71853	8.41933	10.0266
Os01g0129550	4.93428	4.78594	6.54337
Os01g0129800	1.61053	1.7146	0.874591
Os01g0130000	4.01509	30.9753	8.78749
Os01g0130100	3.38417	30.3536	9.69034
Os01g0130200	35.3348	72.8441	30.0313
Os01g0130400	36.7908	7.97573	5.41663
Os01g0130500	4.89087	1.62074	1.55896
Os01g0130900	41.3755	18.2295	21.1101
Os01g0131300	65.3922	96.6664	55.7655
Os01g0131450	62.6993	168.816	141.343
Os01g0131600	223.605	664.498	511.097
Os01g0131800	27.3272	28.3609	28.9523
Os01g0132000	4.32367	483.417	21.4952
Os01g0132200	10.9696	4.4904	3.09131
Os01g0132400	2.9218	1.33279	1.8599
Os01g0132500	12.9239	12.4425	13.1132
Os01g0132700	14.8844	21.6936	21.1173
Os01g0132766	16.436	17.467	15.3984
Os01g0133100	3.24161	1.72545	3.26878
Os01g0133200	22.1734	0.967668	6.17341
Os01g0133400	26.6298	19.1919	18.8606
Os01g0133500	21.9343	4.77792	8.77024
Os01g0133650	2.95153	0.876392	1.00512
Os01g0133799	1.779	1.38471	1.17312
Os01g0133832	31.8656	2.91441	8.89206
Os01g0133900	75.4801	8.48499	21.9604
Os01g0134500	43.6722	11.585	28.4288
Os01g0134700	0.306329	12.9002	5.8851
Os01g0134850	2.408	0.0731971	0.634139
Os01g0134900	14.5832	14.7746	11.1984
Os01g0135600	0.818631	1.61821	2.11118
Os01g0135700	9.20234	55.6855	26.6207
Os01g0135900	146.493	902.682	419.389
Os01g0136050	3.85051	8.03293	13.3741
Os01g0136100	2.3153	14.2852	45.5679
Os01g0136200	10.2847	95.4664	204.52
Os01g0136300	12.4576	8.51353	8.73108
Os01g0136400	2.09344	8.70443	3.53318
Os01g0136600	25.0491	15.4832	28.4427
Os01g0136850	0.72237	1.89177	1.75116
Os01g0137266	1.13244	0.698465	0.737119
Os01g0137282	3.69823	1.72188	1.83211
Os01g0138400	0.00915643	2.54277	0.922402
Os01g0138500	3.36361	2.88038	1.76309
Os01g0138600	1.96125	0.871488	1.4517
Os01g0138800	3.38942	9.82655	1.64363
Os01g0138900	8.6279	13.9626	10.0194
Os01g0139000	29.3029	7.2953	6.65129
Os01g0139200	189.155	102.371	87.5251
Os01g0139700	3.26527	6.83683	2.52319
Os01g0139900	2.18272	1.69708	2.13994
Os01g0140100	466.695	51.2511	169.029
Os01g0140400	30.9882	9.32179	18.0017
Os01g0140500	141.437	113.566	180.033
Os01g0141000	0.693307	2.0505	0.659437
Os01g0141100	49.8808	67.0236	51.4107
Os01g0141150	2.87233	3.65305	2.77968
Os01g0141600	4.55715	2.99441	2.6181
Os01g0141700	2.63206	3.47377	3.6995
Os01g0141900	11.6944	5.39379	9.00967
Os01g0142100	5.69642	4.65545	4.58524
Os01g0142200	6.45213	2.66525	4.27175
Os01g0142300	32.4792	4.57211	6.68464
Os01g0142500	21.5561	44.0581	32.5268
Os01g0142800	17.8614	12.4685	9.32785
Os01g0142875	87.9792	73.3928	50.8108
Os01g0143100	3.00624	4.15632	3.20757
Os01g0143300	7.1911	5.91669	8.0331
Os01g0143350	5.15142	3.29613	6.57293
Os01g0143800	36.6567	70.8447	58.5278
Os01g0143900	13.8265	89.5769	23.7817
Os01g0144000	62.6162	45.6313	57.559
Os01g0144100	3.07668	1.0834	1.29866
Os01g0144200	8.64482	5.06607	4.30622
Os01g0144340	4.95649	4.34908	4.05473
Os01g0144500	2.06359	1.8215	0.958692
Os01g0144600	7.40764	11.0932	9.33855
Os01g0144700	20.9129	20.9907	21.8423
Os01g0147200	23.4471	33.368	28.183
Os01g0147300	5.55515	2.3205	4.03438
Os01g0147700	18.224	10.8638	18.2027
Os01g0147800	7.12134	0.396258	1.3109
Os01g0147850	22.0053	1.53396	5.1223
Os01g0147900	296.459	282.23	303.16
Os01g0148000	25.4954	34.6647	29.5017
Os01g0148500	6.91448	3.52172	5.10191
Os01g0148700	48.6528	46.0548	57.2739
Os01g0149200	23.0274	107.898	89.8254
Os01g0149400	137.972	62.5969	105.214
Os01g0149600	70.1148	57.5702	57.7934
Os01g0149900	1.10767	1.76478	1.11046
Os01g0150000	122.326	39.6094	63.5028
Os01g0150100	52.9548	10.9101	18.4446
Os01g0150400	3.08057	0.35785	0.577678
Os01g0151100	17.6547	17.2975	17.6578
Os01g0151200	26.9381	44.3619	29.6709
Os01g0151400	36.3434	20.2333	26.7183
Os01g0151600	4.57589	13.6893	5.73112
Os01g0151700	48.9895	2.81945	11.6299
Os01g0151750	37.2778	1.45243	9.73654
Os01g0152300	118.331	85.1968	110.62
Os01g0152600	1.70899	1.69412	1.89279
Os01g0152700	168.361	175.663	152.205
Os01g0152850	0.333237	1.32627	0.457048
Os01g0152900	146.433	82.6945	102.963
Os01g0152950	6.71904	6.1508	5.81471
Os01g0153100	188.6	80.1312	83.673
Os01g0153200	1.55103	0.765422	0.484883
Os01g0153275	1.15917	0.606457	0.856883
Os01g0153300	207.021	61.9748	81.6521
Os01g0153400	5.57138	10.7523	8.86251
Os01g0153550	0.853264	1.82532	0.50815
Os01g0153625	1.97635	8.99165	3.37739
Os01g0154300	1.33205	2.51299	2.00812
Os01g0154600	1.17051	1.52377	0.796797
Os01g0155000	0.107347	3.35766	3.25019
Os01g0155400	5.84112	8.86917	5.73727
Os01g0155600	80.4607	78.1914	70.907
Os01g0156300	16.4619	11.914	16.1295
Os01g0157800	1.52155	4.25412	2.69937
Os01g0157900	50.9757	109.051	89.6894
Os01g0158000	6.4553	15.2023	13.6424
Os01g0158100	11.0485	9.22935	11.6435
Os01g0158200	27.4708	13.9862	13.2014
Os01g0158400	0.826753	1.14572	0.617933
Os01g0158500	1.29401	4.19608	1.68533
Os01g0158566	2.94356	2.2705	1.64389
Os01g0158900	19.0164	15.922	14.7733
Os01g0159000	0.915813	43.326	7.37203
Os01g0159200	58.3443	89.9784	108.753
Os01g0159250	42.5251	42.6542	57.2901
Os01g0159300	7.61616	30.3348	9.92801
Os01g0159400	8.15343	31.894	14.2352
Os01g0159800	7.40286	32.5152	11.6423
Os01g0160100	2.2322	17.2257	17.6867
Os01g0160150	0.972164	6.69843	7.10465
Os01g0160800	1.08335	18.4333	4.01752
Os01g0164400	20.5034	29.0941	26.894
Os01g0164500	8.08993	14.1762	14.9288
Os01g0164600	7.83872	5.32891	3.20264
Os01g0164700	11.5605	9.4922	6.72626
Os01g0164800	1.47209	0.713385	0.834232
Os01g0165000	6.42614	17.9262	11.7179
Os01g0165100	1.68146	5.21064	2.585
Os01g0165200	6.74423	1.67593	2.94689
Os01g0165800	8.0247	3.98797	6.74692
Os01g0166100	30.7791	28.8075	19.2716
Os01g0166300	5.22623	2.38698	5.13231
Os01g0166500	145.727	28.1299	88.8649
Os01g0166700	11.4155	6.29346	5.64899
Os01g0166800	4.20973	2.33396	3.1876
Os01g0167100	2.52543	0.521123	0.510099
Os01g0167400	1.43034	22.1367	4.80086
Os01g0167500	65.6105	87.9958	71.213
Os01g0167600	3.37078	5.20513	6.29091
Os01g0167750	1.54735	0.815288	1.38148
Os01g0167800	1.14486	1.26123	1.66221
Os01g0167900	28.857	3.23371	8.47774
Os01g0168100	31.687	22.699	14.7849
Os01g0168200	2.0491	3.02586	2.13263
Os01g0168300	19.182	13.465	19.5131
Os01g0168400	5.79754	9.7262	9.5154
Os01g0168450	13.6427	21.594	22.4944
Os01g0168500	14.9462	17.7482	16.4685
Os01g0168600	6.38473	9.89719	7.31452
Os01g0168800	47.1004	34.3731	35.1918
Os01g0168850	77.0378	56.7328	54.9741
Os01g0169400	22.5814	6.4454	10.0211
Os01g0169500	12.275	10.3203	10.1905
Os01g0169800	16.138	6.86575	9.33105
Os01g0169900	56.6966	102.076	98.0239
Os01g0170000	0.105731	6.5948	0.931381
Os01g0170051	0.803281	35.7353	5.05347
Os01g0170100	2.37944	1.76558	1.68995
Os01g0170300	33.3415	7.4832	12.2844
Os01g0170500	62.8919	13.2979	38.9719
Os01g0170600	6.12263	7.42598	9.00845
Os01g0170900	10.9605	5.04694	5.82656
Os01g0171000	36.3276	14.5769	19.9157
Os01g0171800	12.6521	6.6794	5.21785
Os01g0172000	14.1999	7.05496	8.96484
Os01g0172100	4.26178	30.5447	7.52725
Os01g0172200	26.0742	20.9257	25.2037
Os01g0172300	12.4027	23.024	18.7909
Os01g0172400	124.578	113.097	107.629
Os01g0172701	1.25616	1.52051	1.0453
Os01g0172800	36.2511	108.341	60.1526
Os01g0173100	66.5657	47.0798	62.983
Os01g0173900	3.75884	32.0501	14.1294
Os01g0174000	17.7806	14.4088	18.7449
Os01g0174100	45.1833	18.1629	24.3102
Os01g0174500	8.01223	4.963	4.70967
Os01g0174700	28.9176	6.85938	19.07
Os01g0174900	22.2755	29.1438	33.8566
Os01g0175000	125.195	62.702	72.3603
Os01g0175100	27.2177	245.672	59.7835
Os01g0175400	4.80061	6.63336	6.22571
Os01g0175500	5.36228	4.5994	5.97506
Os01g0175850	0	1.52344	0.918205
Os01g0176100	0.685878	3.02192	1.53992
Os01g0176400	31.5593	6.27678	7.4513
Os01g0176500	3.213	0.201422	0.568215
Os01g0176700	10.0043	7.25613	5.60363
Os01g0176751	20.5703	13.0298	11.0389
Os01g0177100	8.5714	1.63342	3.62954
Os01g0177200	16.5183	13.3825	12.7671
Os01g0177400	10.881	9.24831	4.69568
Os01g0177500	63.9813	45.4239	24.9045
Os01g0177900	96.7533	20.3326	49.6837
Os01g0178000	14.7135	20.7651	13.4665
Os01g0178100	5.82954	5.92157	5.9077
Os01g0178200	7.43838	3.46435	3.51242
Os01g0178300	3.11675	1.01028	0.951452
Os01g0178400	78.627	23.3346	40.0179
Os01g0178500	52.423	150.077	103.052
Os01g0178700	1.21559	1.54202	1.12044
Os01g0178850	8.82286	0	2.54948
Os01g0178900	0.853809	1.15833	0.315655
Os01g0179000	6.12742	42.495	9.00116
Os01g0179200	89.6801	157.469	124.666
Os01g0179400	4.83095	6.8705	6.03126
Os01g0179500	8.47623	12.4566	11.4709
Os01g0179600	41.7024	65.3037	49.5213
Os01g0179700	86.0122	69.0089	76.8987
Os01g0179800	8.22433	11.664	7.3228
Os01g0180000	3.37469	2.13475	1.27163
Os01g0180050	37.8578	22.7692	19.7897
Os01g0180300	9.20937	10.0661	8.79421
Os01g0180400	25.9565	11.5542	13.9196
Os01g0180600	10.1481	14.2332	14.7946
Os01g0180800	81.5919	71.4021	77.0016
Os01g0180850	23.4366	15.2265	15.3397
Os01g0181000	15.0869	23.1201	29.0398
Os01g0181166	7.49827	7.55383	14.6907
Os01g0181300	6.30704	7.07059	6.20458
Os01g0182100	3.94395	7.31281	9.38384
Os01g0182200	95.8381	71.145	64.1831
Os01g0182300	26.2568	20.1357	16.6787
Os01g0182500	4.94224	7.10201	8.41905
Os01g0182600	325.182	432.68	288.544
Os01g0182700	19.7574	3.90002	11.004
Os01g0182832	31.2461	35.3522	38.1613
Os01g0183500	0.255877	11.4804	1.38262
Os01g0183633	8.02643	7.77845	8.13181
Os01g0183800	20.765	32.9634	41.6831
Os01g0184000	6.88066	10.5401	11.9786
Os01g0184100	117.254	73.0994	257.032
Os01g0184500	19.1222	36.9558	29.5185
Os01g0184700	1.31267	0.790739	0.896355
Os01g0184800	20.2328	30.8777	25.7915
Os01g0184900	33.5457	43.5581	44.8665
Os01g0185100	0.989361	1.27776	0.981535
Os01g0185200	31.3424	45.6935	38.989
Os01g0185250	3.45936	7.41836	3.36592
Os01g0185300	354.973	1088.53	588.25
Os01g0185400	9.68711	32.6049	25.7214
Os01g0185500	6.30421	2.32623	3.34988
Os01g0186000	2.06543	18.4806	8.42791
Os01g0186200	27.992	35.7103	29.3904
Os01g0186700	32.1677	21.5385	20.3427
Os01g0186950	0.600119	13.892	8.02344
Os01g0187000	1.9783	3.05225	3.81066
Os01g0187400	13.2848	21.1216	18.1888
Os01g0187500	15.7863	24.416	20.9655
Os01g0187900	7.46032	14.6502	18.3837
Os01g0188100	13.5983	52.6724	29.3859
Os01g0188200	4.21612	2.54104	2.84229
Os01g0188400	87.5777	92.694	48.776
Os01g0188900	22.7289	24.8041	24.9067
Os01g0189700	7.9788	6.16131	5.62416
Os01g0189800	22.9764	28.0057	30.7889
Os01g0190000	69.9723	66.2529	81.6643
Os01g0190300	19.0947	33.8291	16.8266
Os01g0190400	2.4436	4.12697	3.289
Os01g0190500	9.58413	0.80581	2.34217
Os01g0191100	183.48	130.303	174.8
Os01g0191200	306.504	109.172	108.666
Os01g0191300	15.4688	18.0443	16.5679
Os01g0191500	59.8051	42.7756	45.3975
Os01g0191700	8.45084	52.8575	24.3982
Os01g0191800	5.99254	0.317413	1.52798
Os01g0191900	5.78227	14.887	18.6891
Os01g0192000	31.2037	56.06	69.7544
Os01g0192101	150.158	210.763	273.623
Os01g0192300	7.01305	40.4871	8.13069
Os01g0192401	5.69351	5.1295	8.2493
Os01g0192500	3.26287	3.90434	4.79062
Os01g0192550	0.611859	1.32107	1.6226
Os01g0192600	20.5251	15.7298	21.3426
Os01g0193500	1.41241	1.84286	2.47877
Os01g0193600	1.01397	1.42607	1.43237
Os01g0193700	2.01118	2.11052	1.95552
Os01g0193900	5.58969	4.44243	5.37167
Os01g0194000	28.0363	64.2328	45.5682
Os01g0194200	2.89745	1.28766	2.25552
Os01g0194300	8.93768	41.2762	24.0281
Os01g0194600	72.0508	63.7531	89.8358
Os01g0195000	43.2575	25.8836	41.1578
Os01g0195200	109.599	12.5336	33.4254
Os01g0195300	1.72411	3.42431	3.79162
Os01g0195400	301.776	167.815	396.387
Os01g0195500	79.2417	61.7963	85.0288
Os01g0196500	29.6049	20.6031	23.8283
Os01g0196600	17.7846	10.9889	12.6443
Os01g0197100	4.05953	13.7239	8.97265
Os01g0197150	4.60872	22.1156	11.3557
Os01g0197200	18.1691	19.0614	24.0194
Os01g0197350	14.3356	29.0982	22.3516
Os01g0197450	7.61065	9.8697	9.63927
Os01g0197700	2.57771	6.37151	0.685922
Os01g0197900	1.33697	4.09923	2.5418
Os01g0198000	15.8764	14.7672	14.4876
Os01g0198200	28.943	33.9457	34.1072
Os01g0198250	4.68142	4.25657	4.48028
Os01g0198500	35.07	60.8325	62.6099
Os01g0198702	1.40852	1.64088	1.95039
Os01g0198900	56.3248	35.6239	24.1656
Os01g0199400	16.0537	37.3815	25.9024
Os01g0199700	0.145821	1.11271	0.767793
Os01g0199900	11.7428	10.1856	9.91623
Os01g0200000	21.4685	17.5614	13.4265
Os01g0200150	3.84627	3.35419	2.56939
Os01g0200300	0.586282	12.443	4.44732
Os01g0200350	0.0788679	2.55414	0.931129
Os01g0200400	16.8282	2.70782	4.90795
Os01g0200500	18.2844	15.7052	20.3196
Os01g0200600	5.35435	0.818642	1.93756
Os01g0200700	194.987	434.51	293.46
Os01g0201000	25.1813	27.1888	20.1361
Os01g0201100	1.48529	17.2185	9.68032
Os01g0201200	9.58938	4.5355	5.30527
Os01g0201250	5.17218	1.17342	2.55102
Os01g0201275	12.6607	2.7588	5.00179
Os01g0201600	505.91	49.7272	183.515
Os01g0201700	27.8817	39.6143	44.482
Os01g0201900	17.9581	9.60302	9.64027
Os01g0202500	35.603	18.3533	20.8281
Os01g0202800	15.1408	4.54992	5.59434
Os01g0203000	45.6424	34.2818	43.274
Os01g0203300	1.98865	2.9032	2.92229
Os01g0203400	3.31569	3.00626	1.57851
Os01g0203800	1.56977	2.46018	1.79998
Os01g0203900	44.809	43.0416	36.9616
Os01g0204000	1.77296	1.84918	1.92278
Os01g0205100	6.34864	5.61843	6.2402
Os01g0205300	2.88987	1.40595	0.941583
Os01g0205500	126.83	78.1342	123.097
Os01g0205600	6.79529	12.1684	8.84129
Os01g0205700	65.4228	41.3625	48.1876
Os01g0205900	95.881	5.6693	16.604
Os01g0206200	41.7464	38.5171	56.4464
Os01g0206300	0.0653484	2.15958	0.846981
Os01g0206600	67.513	47.4976	68.65
Os01g0206800	1.7346	0.562914	1.2668
Os01g0207001	2.42353	1.07718	2.01195
Os01g0207200	8.80078	3.69218	6.02584
Os01g0207400	34.6616	25.8705	23.4071
Os01g0207600	7.07976	3.43494	4.94462
Os01g0207900	0.159444	1.44353	2.58927
Os01g0208400	17.2427	5.83908	5.14434
Os01g0208600	49.636	28.5068	34.2563
Os01g0208700	6.1152	10.8348	8.1056
Os01g0208800	18.4082	38.519	26.5582
Os01g0209000	12.793	6.46889	9.25039
Os01g0209200	7.37274	8.94529	10.9764
Os01g0209400	24.283	36.6833	26.612
Os01g0209566	2.41829	2.93079	3.02919
Os01g0209700	5.02078	2.92518	1.70471
Os01g0209750	7.28	3.06296	2.42193
Os01g0209800	0.637251	2.1358	0.717278
Os01g0209901	7.49484	23.6292	8.43561
Os01g0210300	20.4816	1.43495	4.10428
Os01g0210400	1.55145	0.50655	1.43734
Os01g0210500	142.292	160.008	174.397
Os01g0210550	67.7754	58.4877	70.6961
Os01g0210600	180.265	142.659	139.294
Os01g0210750	2.84394	1.75596	2.13329
Os01g0210800	7.19671	2.96839	4.55615
Os01g0211600	3.32786	2.9753	1.92169
Os01g0211800	43.6807	0.693785	8.21773
Os01g0212000	21.4078	3.71353	12.8492
Os01g0212100	11.8549	6.12987	7.08676
Os01g0212400	76.7355	46.1878	66.8258
Os01g0212500	18.5967	12.1103	17.1706
Os01g0212700	24.6703	19.7325	31.8352
Os01g0212900	3.0112	0.416872	0.387032
Os01g0213400	0	2.36816	0.60693
Os01g0213800	3.53015	0.630992	2.33154
Os01g0214001	76.3721	14.8505	59.6333
Os01g0214200	13.0502	5.27793	8.1182
Os01g0214300	20.8356	17.7188	15.4589
Os01g0214400	7.69475	88.2283	20.1758
Os01g0214600	17.0909	195.708	122.524
Os01g0214800	2.44093	104.277	37.8565
Os01g0215100	1.29985	1.11019	2.56425
Os01g0215500	0.840943	3.85348	4.58742
Os01g0215700	77.3663	5.3827	25.9006
Os01g0215725	37.7084	2.69909	12.89
Os01g0216400	1.10468	1.72367	5.46489
Os01g0217000	9.4055	4.5	5.45334
Os01g0217050	2.90995	1.34445	2.34554
Os01g0217500	1.14459	6.69812	1.0572
Os01g0217800	10.2975	8.00266	7.99128
Os01g0217900	23.5099	31.3812	19.4425
Os01g0218100	0.255989	7.17202	3.59517
Os01g0218350	5.50956	0.629735	1.78892
Os01g0218500	96.0713	146.693	98.1911
Os01g0218700	14.0476	21.5657	14.6077
Os01g0218900	14.7309	9.32198	15.6276
Os01g0219000	23.7746	26.3698	43.4941
Os01g0219100	8.32219	4.78658	5.86615
Os01g0219300	9.30412	4.32181	2.52101
Os01g0219500	205.424	0.978201	47.8079
Os01g0220200	16.7477	30.381	23.8532
Os01g0220300	35.7524	41.0711	60.7507
Os01g0220400	4.35052	18.5483	22.2751
Os01g0221000	5.10427	17.0286	10.0307
Os01g0221100	8.48333	18.8582	10.6171
Os01g0221300	6.92718	5.34595	8.03226
Os01g0221500	2.79222	3.87614	2.42645
Os01g0221600	5.21562	7.05033	4.52308
Os01g0221900	3.34117	5.11719	3.69873
Os01g0222500	13.7442	2.96641	2.98956
Os01g0222600	12.9653	101.014	21.5744
Os01g0223000	2.03619	8.91109	6.62861
Os01g0223200	12.7662	14.4055	13.1363
Os01g0223500	109.922	17.0431	36.7815
Os01g0223700	4.23444	3.38374	3.49559
Os01g0223900	6.53685	3.5931	2.40871
Os01g0224000	1.13258	1.8922	1.00363
Os01g0224100	33.7287	26.8422	22.5865
Os01g0224166	0.995723	1.77498	1.42635
Os01g0224200	0.795862	1.78426	1.57929
Os01g0224300	3.82753	3.48595	6.55185
Os01g0224400	1.84594	7.68222	4.45715
Os01g0224500	13.6579	18.1137	18.399
Os01g0225000	33.3034	35.1215	21.4138
Os01g0225100	37.2792	38.4659	38.1339
Os01g0225200	8.85295	12.3209	12.2795
Os01g0225400	4.7753	8.59885	7.81865
Os01g0225550	2.43568	43.5388	24.9161
Os01g0226200	40.531	7.86606	22.3569
Os01g0226300	294.141	81.7402	107.051
Os01g0226450	1.13997	1.35326	2.26753
Os01g0226500	9.57899	23.981	27.7971
Os01g0226700	18.5004	20.2868	19.8
Os01g0227100	16.3332	30.4127	17.7319
Os01g0227200	33.2514	51.4693	41.7811
Os01g0227250	14.7008	30.2298	20.7531
Os01g0227300	48.7969	35.3565	31.9915
Os01g0227350	0.937628	2.5039	2.96938
Os01g0227400	0.958786	2.21589	1.78018
Os01g0227800	0.920009	2.93171	2.63155
Os01g0228300	19.021	9.77208	11.0847
Os01g0228400	9.00902	21.1086	11.6306
Os01g0228450	88.7873	214.956	130.262
Os01g0228500	2.68732	3.75935	3.73103
Os01g0228600	73.4604	73.1224	48.8271
Os01g0228800	14.6297	15.5354	10.4112
Os01g0228901	2.33988	0.863283	1.04003
Os01g0229000	3.79961	2.00423	1.99101
Os01g0229100	23.9134	18.1135	24.1091
Os01g0229200	86.5681	69.3836	81.5811
Os01g0229250	5.98037	3.5777	4.8477
Os01g0229300	1.73649	1.42841	1.26345
Os01g0229400	11.067	8.82894	9.55235
Os01g0229500	15.5131	27.9024	25.182
Os01g0229900	4.7291	1.9776	2.66165
Os01g0230200	10.3603	5.33753	5.48526
Os01g0230800	1.94451	9.41797	8.44236
Os01g0231000	151.742	6.18182	88.8179
Os01g0231500	20.184	43.6098	28.4217
Os01g0231700	194.672	131.649	170.847
Os01g0231800	17.6453	23.2474	25.1932
Os01g0231900	10.6457	6.27647	7.68877
Os01g0231950	415.136	96.8621	172.016
Os01g0232000	215.503	568.667	301.883
Os01g0232200	39.3448	2.42294	7.43229
Os01g0232300	7.57281	6.78394	7.90063
Os01g0232400	14.7645	15.945	15.2695
Os01g0232450	5.72687	5.36045	5.13492
Os01g0232500	13.6329	19.9495	21.8877
Os01g0232550	21.665	39.7285	37.3175
Os01g0232700	10.6938	15.8204	12.9423
Os01g0232800	56.9239	38.114	39.4915
Os01g0233000	91.7649	141.354	85.8983
Os01g0233500	2.76496	0.741268	1.25521
Os01g0233900	4.83826	17.2656	16.1384
Os01g0234300	10.0323	6.36618	5.66393
Os01g0234700	38.7839	11.4611	22.8645
Os01g0234800	11.8827	11.1258	11.644
Os01g0234900	24.2483	38.0059	31.6786
Os01g0235100	28.9636	18.3987	13.2695
Os01g0235200	3.09861	4.34229	4.14296
Os01g0235300	19.4704	22.1307	20.658
Os01g0235325	45.7467	49.0666	46.2215
Os01g0235400	33.3971	27.2665	27.5805
Os01g0235700	16.3644	30.6352	28.6947
Os01g0235800	15.3071	14.1078	17.5361
Os01g0235900	0.063219	11.2557	3.96828
Os01g0236000	14.3426	4.06648	7.73902
Os01g0236300	43.1498	86.447	53.4655
Os01g0236400	17.3761	3.21952	12.2275
Os01g0236700	9.89858	17.4445	9.21462
Os01g0236800	6.98154	6.13657	6.56372
Os01g0236900	3.39936	2.79478	2.54834
Os01g0237100	3.35799	2.72929	3.8284
Os01g0237400	1.91756	13.5835	3.8033
Os01g0238200	100.754	68.5881	78.3814
Os01g0238287	128.67	85.8366	96.9841
Os01g0238500	23.251	40.9141	33.1589
Os01g0238600	142.534	156.543	164.554
Os01g0238800	25.919	20.8732	22.7079
Os01g0238850	6.68005	6.04645	6.14907
Os01g0239000	67.9275	94.1233	68.4016
Os01g0239100	3.50726	5.33507	6.6667
Os01g0239150	4.34442	6.00554	7.29844
Os01g0239200	218.073	185.35	130.12
Os01g0239300	2.47828	1.26448	2.86863
Os01g0239700	55.5571	39.0972	29.646
Os01g0240700	1.32774	0.3322	1.43049
Os01g0241000	10.044	11.5536	7.97471
Os01g0241100	3.89986	4.01996	3.56862
Os01g0241400	0.806517	7.61063	1.91073
Os01g0242300	43.5119	4.02811	7.00642
Os01g0242500	7.0805	4.9737	5.29296
Os01g0242600	10.4295	24.5586	15.7377
Os01g0242900	52.881	20.8594	23.1863
Os01g0243000	1.71954	1.88012	1.93671
Os01g0243100	2.19043	1.71272	2.01603
Os01g0243200	8.11758	15.0277	8.78492
Os01g0243300	1.61551	2.99935	2.32174
Os01g0243400	42.7684	42.8301	33.9106
Os01g0243600	1.73565	2.50836	2.82371
Os01g0243700	57.1212	4.34621	7.82405
Os01g0243800	0.892635	2.12378	1.64443
Os01g0246100	6.89811	8.21015	6.61072
Os01g0246400	56.5283	24.3705	26.846
Os01g0246500	5.69059	9.59133	9.34266
Os01g0246601	12.9549	0.621405	6.88303
Os01g0246700	1.08501	92.3018	18.2601
Os01g0247500	5.04987	22.746	11.0992
Os01g0247550	3.46545	13.7981	6.87469
Os01g0247600	8.86623	33.5555	11.0187
Os01g0247900	23.5652	2.47485	4.05634
Os01g0248300	2.29595	4.49373	0.823415
Os01g0248400	7.73534	7.01049	4.79191
Os01g0248500	0.937455	2.06326	0.853331
Os01g0248600	8.84685	7.57882	10.5924
Os01g0248701	0.266291	6.17851	1.06925
Os01g0248800	3.73709	2.41876	0.735548
Os01g0248850	8.70422	4.38555	3.55074
Os01g0249200	718.851	1181.28	842.873
Os01g0249300	81.907	55.9423	53.2621
Os01g0249900	3.24031	1.37364	3.59816
Os01g0250600	24.5319	40.4724	43.8056
Os01g0250900	25.9172	17.9572	22.3898
Os01g0251100	11.9457	13.137	15.7292
Os01g0251200	9.22969	12.9445	11.421
Os01g0251400	1865	114.199	514.567
Os01g0252100	112.959	66.5583	74.5329
Os01g0252150	9.16847	6.27132	6.23752
Os01g0252300	22.2352	0.268899	3.67308
Os01g0252900	6.23534	4.89947	5.97418
Os01g0253100	23.3706	21.7025	19.9518
Os01g0253300	93.8373	96.3948	113.905
Os01g0253400	25.4321	5.03418	7.37088
Os01g0253500	2.7615	42.4532	8.76531
Os01g0253600	24.9572	10.7964	12.6049
Os01g0253900	4.65401	10.2127	6.07425
Os01g0254000	138.447	212.969	274.415
Os01g0254100	16.5387	28.2631	18.4154
Os01g0254200	98.4684	70.8298	72.566
Os01g0254300	3.89468	0.669486	0.937876
Os01g0254350	11.3281	1.13508	3.04779
Os01g0254800	17.2299	27.1654	23.5362
Os01g0254900	42.0677	51.1621	41.4917
Os01g0254950	20.295	17.3413	18.4912
Os01g0255000	68.4646	100.201	104.698
Os01g0256400	73.9739	48.6618	58.338
Os01g0256500	160.415	1490.81	1187.51
Os01g0256600	38.4916	31.9815	31.1331
Os01g0256800	6.0762	6.66037	6.28786
Os01g0256900	58.353	77.3821	73.3105
Os01g0257100	383.833	111.317	161.141
Os01g0257400	20.6886	27.8098	30.1673
Os01g0257900	2.41112	2.14483	2.51594
Os01g0258000	17.38	12.4877	15.9358
Os01g0258600	11.4413	6.33025	10.1794
Os01g0258700	48.4619	41.3509	45.6167
Os01g0259200	6.50788	24.6294	12.1986
Os01g0259600	18.7299	29.5133	21.2091
Os01g0260500	0.818131	1.03729	1.04668
Os01g0260700	54.2227	35.7351	37.9236
Os01g0260800	92.2116	45.8978	56.9392
Os01g0261100	23.8973	28.4089	27.2766
Os01g0261200	10.5371	75.3733	52.8005
Os01g0261500	21.1948	12.4075	12.4997
Os01g0262500	49.7913	13.5747	24.4882
Os01g0262600	13.4553	3.7502	11.8006
Os01g0262700	6.73445	2.91013	3.54619
Os01g0263300	206.753	342.943	109.493
Os01g0263500	5.74408	4.98301	4.98538
Os01g0263600	2.8387	10.3609	8.56808
Os01g0263900	5.09617	47.1613	27.0788
Os01g0264000	1.54017	13.8356	7.42951
Os01g0264400	39.3654	31.3834	30.4123
Os01g0264500	30.9977	48.6486	57.7007
Os01g0264600	0.662114	7.63377	1.67785
Os01g0264700	27.7407	27.6966	34.9382
Os01g0265000	8.67004	2.34102	6.86321
Os01g0265100	127.087	48.9204	38.4721
Os01g0265200	9.21431	6.98761	7.72864
Os01g0265400	1.28435	0.930204	1.03365
Os01g0265700	8.39064	11.762	14.1775
Os01g0265800	45.1725	27.9232	33.734
Os01g0265900	4.08962	4.15231	5.00171
Os01g0266000	13.026	14.1042	12.3239
Os01g0266100	44.8137	63.3567	28.172
Os01g0266200	5.85556	4.8569	3.53551
Os01g0266400	39.9323	8.66401	16.7733
Os01g0266500	8.88391	12.5394	11.6061
Os01g0266600	94.4818	77.9222	94.1346
Os01g0266800	15.7759	15.1036	11.2874
Os01g0267100	9.91964	12.2742	11.9042
Os01g0267200	81.4844	86.5273	95.9371
Os01g0267400	7.44076	5.51727	6.71512
Os01g0267600	8.86927	20.6501	19.8734
Os01g0267800	6.20142	1.08685	3.55671
Os01g0267900	149.757	34.6886	73.6381
Os01g0268100	6.18195	6.19751	5.73443
Os01g0268300	11.9414	15.8598	14.3607
Os01g0268600	0.206837	2.87454	0.961056
Os01g0268800	13.53	35.4972	19.5306
Os01g0268900	6.13406	8.82988	11.6232
Os01g0269000	4.00211	18.0428	8.1543
Os01g0269100	14.1863	15.2639	20.3583
Os01g0269900	4.4115	4.28955	5.0334
Os01g0269950	3.964	3.15221	4.49794
Os01g0270100	91.8789	284.74	322.153
Os01g0270300	17.096	2.31632	8.78371
Os01g0270501	60.955	13.4379	34.6682
Os01g0271000	11.1514	18.0796	18.1584
Os01g0271200	2.88453	4.00939	3.64332
Os01g0271400	21.0018	24.8869	24.3551
Os01g0271500	21.4573	16.7612	18.4687
Os01g0271700	28.4933	44.7729	43.8161
Os01g0272600	1.27386	3.30588	2.85331
Os01g0272800	6.28673	9.53059	6.80603
Os01g0272850	8.71066	13.3314	11.1047
Os01g0273000	115.869	167.262	164.471
Os01g0273100	23.0172	0.363553	3.10735
Os01g0273150	5.14197	0.667766	1.94445
Os01g0273300	31.7245	23.0657	25.439
Os01g0273500	5.32141	6.21686	4.96513
Os01g0273800	9.03575	4.43166	7.00317
Os01g0273850	6.6323	2.93802	3.45315
Os01g0274800	12.2379	34.9377	15.8482
Os01g0275300	52.6138	76.9045	75.6702
Os01g0275500	1.44302	1.04383	1.88582
Os01g0275600	260.399	369.824	468.202
Os01g0275900	5.16467	5.16275	5.30257
Os01g0276000	270.752	191.06	256.248
Os01g0276100	43.6347	62.864	39.9487
Os01g0276200	15.6047	17.6807	22.4965
Os01g0276400	8.66123	12.5459	9.46818
Os01g0276500	8.87448	9.33009	8.55259
Os01g0276600	70.5411	25.6253	45.7925
Os01g0276700	33.7476	52.0649	44.3135
Os01g0276800	50.7086	39.3643	46.4796
Os01g0276900	1.39006	22.5472	1.96328
Os01g0277500	7.15804	3.66273	6.51749
Os01g0277600	4.39352	8.01724	6.50757
Os01g0277700	29.3149	13.8036	23.8656
Os01g0278000	5.12339	27.962	27.6906
Os01g0278200	8.10507	7.61465	7.53287
Os01g0278600	4.95424	4.50843	4.07484
Os01g0278900	91.1248	76.2418	70.0764
Os01g0278950	19.6934	4.28528	5.58448
Os01g0278975	21.6863	4.71678	7.29877
Os01g0279100	176.2	147.988	112.187
Os01g0279200	28.0647	28.5378	28.4485
Os01g0279300	294.468	180.155	211.191
Os01g0279400	9.84412	5.2941	9.28908
Os01g0279700	28.3447	30.5095	22.1278
Os01g0279800	97.8332	66.4813	91.7796
Os01g0279900	13.9699	18.3299	17.8822
Os01g0280000	20.4358	26.2949	26.2328
Os01g0280200	4.66292	4.55439	8.5076
Os01g0280400	2.14208	4.61147	4.39751
Os01g0280500	2.44499	45.3363	11.1729
Os01g0281000	24.487	49.95	39.6201
Os01g0281050	36.2823	78.9731	61.3786
Os01g0281100	22.8184	83.0876	40.0683
Os01g0281400	95.6965	85.7552	101.587
Os01g0281600	96.28	178.84	132.671
Os01g0282800	166.402	31.832	59.6033
Os01g0282866	679.102	102.804	212.1
Os01g0283000	3.48823	0.874869	1.70783
Os01g0283100	73.1538	38.7663	39.5852
Os01g0283300	82.2765	664.388	311.439
Os01g0283400	1.28824	4.87881	2.13279
Os01g0283500	7.01208	42.636	27.6938
Os01g0283700	0.546928	4.94452	0.178818
Os01g0284500	73.2163	150.515	65.5593
Os01g0284700	33.9386	39.9575	34.4648
Os01g0284900	1.62945	8.56231	2.97601
Os01g0285300	22.5912	39.1106	21.2232
Os01g0286000	6.51704	8.12019	6.22579
Os01g0286100	10.1794	40.1664	18.5725
Os01g0286200	9.08443	28.9798	14.8
Os01g0286600	37.759	22.2581	21.0118
Os01g0286900	2.53981	8.78585	8.0202
Os01g0287600	0.438966	2.4854	1.0336
Os01g0287700	5.43573	5.82122	4.44768
Os01g0288200	20.6669	0.334678	1.8534
Os01g0288800	0.0159221	3.71741	0.0648248
Os01g0289600	3.8775	49.6957	46.0572
Os01g0289732	6.75084	90.3791	84.4029
Os01g0290000	86.3977	222.736	226.844
Os01g0290100	52.8181	39.4268	41.8779
Os01g0290600	11.0775	28.3224	21.2542
Os01g0290700	59.9474	256.079	109.853
Os01g0290800	9.91013	33.2871	16.7934
Os01g0291500	13.9155	40.5285	57.8318
Os01g0291733	81.9488	261.195	368.689
Os01g0292200	42.2749	105.125	37.703
Os01g0292900	8.40175	24.3592	10.0556
Os01g0293000	4.87232	0.770046	3.87265
Os01g0293100	20.5273	2.65779	13.9616
Os01g0293200	4.57561	4.22693	5.99696
Os01g0294700	38.576	275.464	174.11
Os01g0295700	13.8263	79.3394	36.6702
Os01g0295900	3.83019	2.83047	3.02393
Os01g0296000	1.89806	1.92325	3.27924
Os01g0296100	19.7691	27.9718	24.2604
Os01g0296200	13.8826	9.52137	11.8736
Os01g0296450	2.4867	0.318169	0.661774
Os01g0296700	25.1227	3.74765	11.3013
Os01g0297200	0.959178	1.38024	1.86944
Os01g0298301	3.64284	11.7209	8.24564
Os01g0298400	0	2.9087	0.0974862
Os01g0298500	5.70942	3.40183	3.90247
Os01g0299400	22.9204	13.8111	21.1004
Os01g0299500	23.7092	25.5694	18.9416
Os01g0300200	148.324	28.8175	61.1246
Os01g0300400	1.75662	0.876192	1.12116
Os01g0300600	19.6399	6.63056	9.16508
Os01g0300900	49.9901	11.5643	40.1247
Os01g0301000	4.54245	5.95291	8.5984
Os01g0301300	2.00406	4.42013	2.17186
Os01g0301700	2.02523	0.698975	1.84417
Os01g0302000	6.81464	1.87519	1.82802
Os01g0302100	13.217	3.59014	7.13598
Os01g0302500	10.5987	3.24216	4.68666
Os01g0302800	17.7322	8.83856	12.3748
Os01g0303000	231.842	478.024	235.676
Os01g0303200	9.5403	3.67441	4.72414
Os01g0303600	20.9377	14.4856	8.55009
Os01g0303800	0.277373	4.98475	1.31982
Os01g0304000	160.646	150.557	155.658
Os01g0304100	3.38145	2.25637	3.59096
Os01g0304300	14.1229	10.6797	13.5299
Os01g0305200	8.89316	54.9145	17.0011
Os01g0305900	7.08079	6.13455	8.02965
Os01g0306100	2.82703	0.113643	0.79852
Os01g0306400	0.057119	2.77849	2.45504
Os01g0306800	9.20396	12.1347	15.4626
Os01g0306900	2.41404	6.01461	4.09287
Os01g0307624	0.11883	19.2161	0.922032
Os01g0308600	21.4649	63.1703	34.5343
Os01g0309100	63.2233	53.5217	38.8041
Os01g0309800	0.594162	2.70147	4.80364
Os01g0309900	8.47745	15.2133	17.2141
Os01g0309966	6.05534	10.9264	11.4508
Os01g0310032	3.80092	3.39872	3.22145
Os01g0310500	17.0777	15.2953	15.1654
Os01g0310800	4.70051	4.89027	4.26904
Os01g0311100	3.13916	5.72274	3.99894
Os01g0311300	5.17016	3.85781	5.08584
Os01g0311400	12.3449	20.9309	15.806
Os01g0311500	11.6709	5.72652	10.0952
Os01g0311600	1.14157	1.49469	3.38319
Os01g0311800	1.83101	3.16278	1.50723
Os01g0312500	104.203	24.4735	36.0651
Os01g0312600	93.6817	18.4125	27.9776
Os01g0312800	8.14508	1.86763	2.60524
Os01g0313050	13.8213	3.85172	5.99954
Os01g0313300	41.0889	74.3523	52.0462
Os01g0313600	0.163659	5.82944	1.16143
Os01g0314000	2.04315	1.65936	1.82066
Os01g0314100	9.38485	44.6151	15.2034
Os01g0314300	51.6336	31.4287	36.7086
Os01g0314800	2.20469	498.702	144.609
Os01g0315600	106.109	36.8573	56.9034
Os01g0315800	23.162	41.2209	35.0307
Os01g0315850	42.8248	73.0204	67.5451
Os01g0316100	2.5843	4.00418	3.56032
Os01g0316500	25.1793	24.563	25.2199
Os01g0316600	6.62822	16.3289	12.0167
Os01g0316800	168.599	100.451	126.58
Os01g0316900	30.3616	59.0198	49.3426
Os01g0317125	7.3345	15.8767	13.3361
Os01g0317500	24.4928	7.58698	12.246
Os01g0317800	334.825	128.52	175.34
Os01g0318202	2.3054	1.83488	2.65437
Os01g0318400	5.30317	3.77771	5.89257
Os01g0318600	2.72541	3.98971	3.2303
Os01g0318700	4.07646	7.1915	6.13746
Os01g0319000	2.15892	23.1271	13.685
Os01g0319066	0.53941	5.95719	3.8201
Os01g0320700	12.572	6.6279	8.92026
Os01g0321300	11.6652	15.1659	13.1437
Os01g0321700	14.3351	7.43569	7.50405
Os01g0321800	15.3964	24.4278	18.5279
Os01g0322800	11.4974	9.24887	9.5648
Os01g0323000	37.7768	26.0561	32.8987
Os01g0323100	5.11558	3.57943	5.1773
Os01g0323300	3.69046	1.57544	2.1406
Os01g0323500	6.63741	2.44621	6.3779
Os01g0323600	41.6934	34.8052	47.6332
Os01g0323775	829.765	954.861	1136.27
Os01g0324400	14.152	13.5088	9.17595
Os01g0326000	44.9423	7.66187	11.0951
Os01g0327000	4.09762	89.4761	58.9213
Os01g0327100	1.72799	85.9168	184.295
Os01g0327250	0.298382	10.2681	26.027
Os01g0327500	45.0404	5.03139	29.4834
Os01g0327600	2.7988	2.19409	2.42749
Os01g0327900	5.24641	5.69034	5.01886
Os01g0328300	3.45999	4.48373	3.57378
Os01g0328400	521.085	501.485	736.234
Os01g0328500	11.2838	10.9048	12.1022
Os01g0328600	7.91237	10.6149	6.90073
Os01g0328700	65.8768	95.4702	76.7423
Os01g0328900	14.2537	5.93621	7.60494
Os01g0329300	12.9002	0	0.422473
Os01g0329350	19.9689	0.0388418	0.556298
Os01g0329400	12.947	49.5001	46.1721
Os01g0329800	5.71348	24.4765	15.0909
Os01g0329900	38.0177	40.5245	61.7558
Os01g0330100	17.2495	1.92822	5.92163
Os01g0331100	3.91299	0.809708	1.29073
Os01g0331900	23.7366	22.2196	25.1577
Os01g0332100	5.30709	14.3546	7.00124
Os01g0332150	0.82215	1.6783	0.900202
Os01g0332200	7.53557	2.00125	3.2574
Os01g0332900	4.54209	2.47149	1.8503
Os01g0333600	0.566612	1.42657	0.581067
Os01g0335600	1.38265	1.96738	2.27377
Os01g0335700	3.46305	2.89504	3.60241
Os01g0337160	4.52499	6.96101	6.92023
Os01g0337180	1.62512	4.43328	2.52098
Os01g0337500	0.612626	1.7735	3.54094
Os01g0337600	16.6788	23.8241	17.1759
Os01g0337700	3.11268	6.2099	6.17266
Os01g0337900	16.9789	14.5196	14.4719
Os01g0338000	121.166	47.877	73.6027
Os01g0338100	25.4222	22.755	19.7679
Os01g0338150	2.37462	2.85534	2.55724
Os01g0338200	22.181	32.2619	19.7057
Os01g0338600	19.7192	34.5187	23.6342
Os01g0339400	3.54401	0.830485	0.695514
Os01g0339600	0.8574	0.605608	1.1252
Os01g0339900	33.0387	15.2856	24.1351
Os01g0340600	1.23327	0.56783	0.174957
Os01g0341000	26.8698	2.95758	6.57168
Os01g0341200	25.7088	23.4983	16.767
Os01g0342500	1.19683	6.39881	4.25324
Os01g0342800	15.2976	17.6216	28.6085
Os01g0342900	3.31548	2.55317	1.69925
Os01g0343001	10.3531	7.67221	6.60086
Os01g0343200	10.1344	11.2502	9.6554
Os01g0343300	10.7751	90.4007	22.5811
Os01g0343350	6.37346	59.5086	19.0762
Os01g0343500	3.69023	2.8874	2.02168
Os01g0343780	3.84541	2.07387	2.10905
Os01g0346250	0.084782	4.94008	0.568564
Os01g0346600	1.31252	2.06046	1.39496
Os01g0346700	46.7456	36.8147	33.1303
Os01g0347000	3.22329	0.843124	0.959365
Os01g0347100	3.92153	14.2454	8.51582
Os01g0347200	1.89335	3.81377	2.15243
Os01g0347600	0.0209521	3.07046	0.198249
Os01g0348600	60.4767	53.2424	41.9774
Os01g0348700	142.483	151.879	191.958
Os01g0348900	2.01699	380.598	96.6527
Os01g0349000	5.43099	45.2545	18.6319
Os01g0349400	9.85051	19.3152	13.6378
Os01g0349600	12.6752	12.607	14.9662
Os01g0349800	2.6467	2.64091	7.40498
Os01g0350000	2.50646	8.4611	17.8153
Os01g0350900	34.9597	33.5894	40.8002
Os01g0351100	4.9433	1.35903	2.22024
Os01g0351300	25.1389	15.9068	18.4179
Os01g0351800	2.07287	2.97981	2.4152
Os01g0353900	4.79021	4.67825	5.22618
Os01g0354200	6.80241	1.24101	2.53067
Os01g0354700	1.68627	1.19607	1.22098
Os01g0355175	1.68649	1.45844	1.57792
Os01g0355500	3.5501	6.10759	4.71614
Os01g0355600	10.2345	6.27894	6.49686
Os01g0355900	13.8001	20.761	21.8135
Os01g0356400	113.057	64.5962	46.8618
Os01g0356500	5.54319	8.35272	8.03247
Os01g0357100	40.5136	42.1267	47.9188
Os01g0357200	1.14557	2.90845	5.73992
Os01g0357800	7.64471	5.24287	5.94918
Os01g0357900	526.673	248.901	246.08
Os01g0358100	69.8526	74.3947	38.595
Os01g0358300	4.21585	3.10779	3.21989
Os01g0358400	27.2417	22.2018	27.8603
Os01g0358551	33.8037	29.8886	40.3149
Os01g0359400	5.72481	4.73441	4.05651
Os01g0360200	33.0816	16.5298	17.4684
Os01g0360333	20.7307	12.2962	13.3372
Os01g0360600	11.1217	9.50143	10.623
Os01g0361000	38.7725	38.783	38.5474
Os01g0361800	3.98292	1.05002	3.06568
Os01g0362100	7.83903	5.28061	5.69052
Os01g0362400	19.8149	12.7162	12.8589
Os01g0362533	5.50071	18.487	13.6292
Os01g0363300	37.0448	41.572	30.2589
Os01g0363500	17.5707	22.3056	27.7876
Os01g0363600	5.3096	20.1096	14.1222
Os01g0363900	14.4027	23.4479	23.5833
Os01g0364000	1.70203	1.27579	1.2219
Os01g0364900	2.31396	0.824452	1.0558
Os01g0367100	11.126	7.99226	6.4454
Os01g0367300	22.8624	17.1881	17.8367
Os01g0367400	9.04774	5.23695	3.39624
Os01g0367700	52.6221	43.5792	49.5892
Os01g0367900	42.705	41.5489	46.3458
Os01g0368000	2.49763	4.91634	4.27331
Os01g0369000	46.9141	54.1533	51.3785
Os01g0369200	2.48765	2.44953	2.34449
Os01g0369600	3.25557	3.63061	2.88698
Os01g0369700	2.79913	64.3807	36.5584
Os01g0369800	5.05431	159.61	69.6669
Os01g0369950	0.0829152	1.58048	0.768217
Os01g0370200	1.67557	0.157224	0.747799
Os01g0370400	5.27233	0.887446	1.2916
Os01g0370900	0.432743	6.6587	2.15486
Os01g0371200	28.4038	7.57209	9.4183
Os01g0371300	13.2068	7.09596	10.3384
Os01g0372100	2.11585	0.486243	0.644587
Os01g0372350	4.90336	5.50754	5.70729
Os01g0372700	14.2988	16.3336	16.6069
Os01g0372866	28.7167	29.4374	27.1184
Os01g0373400	1.2821	1.25411	1.10432
Os01g0373700	0	2.13178	0.564977
Os01g0374900	13.3489	19.8156	26.436
Os01g0375000	17.3644	34.3179	36.4396
Os01g0375100	6.17978	5.01854	6.76865
Os01g0375200	29.6997	32.9014	21.5452
Os01g0376700	10.6735	9.21772	8.73296
Os01g0377500	20.3103	24.3537	20.7517
Os01g0377700	67.8385	61.7225	73.6357
Os01g0378100	1.66987	9.03073	5.09677
Os01g0379101	1.228	1.10861	1.82962
Os01g0379400	4.61451	4.03998	4.00013
Os01g0382400	6.54614	215.97	705.586
Os01g0382700	3.75198	4.8205	4.59623
Os01g0382900	10.8179	18.5115	20.8931
Os01g0383700	3.24335	36.5771	16.5704
Os01g0383900	11.7917	11.2074	13.9896
Os01g0384300	5.48401	4.66183	6.92865
Os01g0384800	1.64505	44.4975	11.1872
Os01g0385400	0.612159	2.369	3.69603
Os01g0386600	3.29361	10.1233	8.27779
Os01g0386700	41.2228	43.6444	34.4151
Os01g0387133	1.40134	1.78619	1.31087
Os01g0387566	2.25454	0.162443	0.802583
Os01g0388000	18.0687	10.9674	14.6056
Os01g0388200	34.2237	9.22526	23.5894
Os01g0388500	10.7549	4.15949	4.53644
Os01g0390300	8.8945	21.6398	10.8334
Os01g0390400	9.28149	15.4584	10.8273
Os01g0390600	0.540846	1.33395	1.13283
Os01g0390900	13.0398	6.76042	7.38413
Os01g0391100	4.04899	1.75472	2.69732
Os01g0391500	18.5458	17.2038	18.1604
Os01g0391800	2.38684	0.306329	1.17945
Os01g0392100	10.4797	20.6918	16.9797
Os01g0392600	11.4892	6.01335	7.24249
Os01g0393000	21.048	35.8281	43.9614
Os01g0495900	8.10358	8.88891	7.9973
Os01g0496900	9.82073	8.64998	9.33075
Os01g0498200	61.7047	82.7424	48.5374
Os01g0498300	0.319286	4.03658	3.33892
Os01g0499300	12.5717	15.161	13.079
Os01g0500100	1.37424	2.27806	2.04411
Os01g0500400	3.2036	0.749564	0.971697
Os01g0500500	20.4071	15.4908	15.8808
Os01g0500900	6.54042	9.14049	6.11654
Os01g0501000	16.6227	10.9248	11.0169
Os01g0501700	24.3514	29.0111	23.126
Os01g0501800	929.159	776.061	528.297
Os01g0502400	22.3638	17.1318	19.121
Os01g0502700	10.2307	1.58947	2.15712
Os01g0502800	13.574	16.9358	14.6665
Os01g0503400	1.72483	4.89507	3.54943
Os01g0504100	36.272	23.0283	23.9129
Os01g0504500	2.60263	9.35869	2.31396
Os01g0505400	0.35234	1.64308	0.506477
Os01g0505600	6.56403	2.86506	2.33855
Os01g0505700	10.4517	13.2508	15.0509
Os01g0505866	7.15673	7.29511	9.61861
Os01g0506100	3.22725	4.81844	5.37068
Os01g0506200	6.41168	7.62139	8.70712
Os01g0507000	9.4005	25.1895	19.5005
Os01g0507300	12.743	13.5662	11.654
Os01g0507500	25.4162	36.2117	42.9297
Os01g0507700	47.6909	137.872	88.8545
Os01g0507900	14.802	17.4261	15.1701
Os01g0508000	11.162	3.66376	4.22566
Os01g0508100	0.413263	2.67592	1.79928
Os01g0508300	6.24369	9.62594	6.86826
Os01g0508500	1.47606	3.42636	4.33275
Os01g0509400	3.40228	2.31003	3.98861
Os01g0509900	4.5955	1.20255	2.87119
Os01g0510100	34.1743	41.8918	37.895
Os01g0510200	3.62673	228.196	138.195
Os01g0510500	1.91962	2.52019	2.36629
Os01g0510600	12.7987	16.1724	14.7543
Os01g0510701	4.29123	4.84172	4.81341
Os01g0510800	23.629	20.3244	18.8492
Os01g0511000	7.36051	7.68006	3.49382
Os01g0511100	25.7389	209.529	73.1474
Os01g0511200	19.6794	25.1432	27.3125
Os01g0511300	30.7782	13.0266	19.563
Os01g0511600	7.93388	25.4978	14.5521
Os01g0511800	5.28273	5.01541	4.97499
Os01g0512100	34.6494	39.7199	32.1176
Os01g0512200	10.8885	6.94221	10.623
Os01g0512400	2.04236	0.0480739	1.98745
Os01g0513100	45.5546	34.4053	39.3059
Os01g0513200	12.4356	19.2127	17.5707
Os01g0513400	17.737	36.1016	31.6538
Os01g0513700	123.342	110.225	125.167
Os01g0513800	10.8203	17.6012	16.0546
Os01g0513850	3.38055	5.76038	4.58607
Os01g0513900	2.47697	0.187007	0.495617
Os01g0514000	28.3674	31.7939	36.0167
Os01g0514300	10.2396	5.66618	6.00021
Os01g0514600	17.3292	6.14632	7.09952
Os01g0514850	18.8439	4.78476	10.6935
Os01g0516600	24.4273	32.1177	27.4835
Os01g0516700	19.4981	14.5675	20.7304
Os01g0518500	15.3757	13.9333	11.6613
Os01g0518800	11.04	7.47236	10.7452
Os01g0519050	6.34488	5.97275	6.50836
Os01g0519400	7.79374	8.46788	8.94216
Os01g0519700	1.06541	1.75908	1.78622
Os01g0520180	90.451	51.3826	29.0493
Os01g0520600	1.00121	0.661398	1.10516
Os01g0520800	1.05289	0	1.17833
Os01g0521400	5.2163	9.31761	6.82899
Os01g0521500	3.50807	4.2049	4.44709
Os01g0521550	14.2351	14.355	15.08
Os01g0523000	18.4887	3.3265	10.8795
Os01g0523401	2.82872	5.42988	2.41898
Os01g0524500	22.3715	40.8015	27.6159
Os01g0524700	3.31969	5.62711	4.85381
Os01g0525350	22.9073	13.6866	13.4743
Os01g0525700	79.5511	52.8546	64.3484
Os01g0525800	67.1511	54.9284	35.8776
Os01g0526100	17.8009	22.3605	22.066
Os01g0526200	7.63699	10.19	8.28284
Os01g0527400	16.2393	19.1031	25.3602
Os01g0527600	10.6156	6.383	10.4699
Os01g0527700	17.1504	20.324	15.9092
Os01g0528000	8.21306	5.48494	4.97815
Os01g0528800	40.2781	41.1421	36.2664
Os01g0529800	38.9547	204.316	61.4254
Os01g0530100	4.20036	6.46354	6.83622
Os01g0530300	2.75996	1.21065	2.73285
Os01g0530366	113.085	136.698	131.474
Os01g0530400	14.0851	20.1678	25.3088
Os01g0530500	8.23192	7.21163	7.06898
Os01g0531000	5.33206	5.38554	5.95628
Os01g0531400	19.0438	3.41362	8.68636
Os01g0531500	160.959	106.566	132.769
Os01g0532100	5.6423	2.65256	6.56019
Os01g0532200	19.4357	30.8824	27.346
Os01g0532300	0.872191	2.72257	1.59565
Os01g0532700	0.746476	1.96661	1.47613
Os01g0532800	2.69118	1.74396	1.63381
Os01g0533000	21.1122	10.8066	11.6101
Os01g0533400	0.253868	28.7081	4.73542
Os01g0533900	1.60552	0.223987	0.684124
Os01g0534700	1.31658	0.565609	0.73828
Os01g0534800	7.77658	18.1044	12.3634
Os01g0534900	72.815	44.8317	41.1357
Os01g0535100	2.03651	0	1.52086
Os01g0535400	5.69877	2.83294	4.06285
Os01g0535650	1.55425	1.00172	1.7899
Os01g0535900	7.03522	7.6927	10.4697
Os01g0536000	12.777	12.2537	11.3296
Os01g0537250	8.40913	1.3964	4.2613
Os01g0538000	38.9063	67.5003	72.9228
Os01g0539400	75.6518	87.8795	80.7043
Os01g0539900	1.03919	1.38935	1.04835
Os01g0540800	24.9941	22.1881	22.9179
Os01g0541600	1.71265	5.42241	4.17625
Os01g0541800	9.32784	10.6128	8.45588
Os01g0541900	4.0112	19.4668	9.86642
Os01g0542000	111.343	55.4278	137.051
Os01g0542700	7.63141	10.4161	7.07924
Os01g0543000	1.96171	0.504584	0.649471
Os01g0543100	285.676	44.2174	112.389
Os01g0544450	3.89155	0.662779	1.56869
Os01g0544700	14.2584	7.38123	8.83663
Os01g0545100	16.9783	16.9252	21.5483
Os01g0545900	1.37851	2.32042	2.47896
Os01g0546400	3.88513	0.547315	0.919645
Os01g0546500	5.68453	3.13136	8.27793
Os01g0546800	22.9635	22.3907	24.2341
Os01g0546900	14.5904	17.6128	16.254
Os01g0547133	28.463	4.76414	12.8458
Os01g0547200	4.09998	5.38316	4.50677
Os01g0547500	1.0331	1.27441	1.03146
Os01g0547600	5.69736	9.95291	11.1186
Os01g0548600	1.76828	8.35555	1.62086
Os01g0549200	5.09387	7.24724	6.43799
Os01g0549400	37.1375	50.825	45.2432
Os01g0549500	11.5678	11.506	12.4381
Os01g0549700	77.2446	118.037	115.38
Os01g0550100	29.4191	40.6874	35.192
Os01g0550200	21.931	26.9023	31.7569
Os01g0550300	302.218	1536.14	940.321
Os01g0550600	3.89515	1.66636	3.276
Os01g0551000	5.9329	9.42751	5.04333
Os01g0551100	1.31511	17.2818	18.4719
Os01g0551400	14.2849	15.4548	23.1961
Os01g0551800	2.16263	0.306339	0.864114
Os01g0551900	6.50816	4.68492	5.60342
Os01g0552050	2.03057	1.72004	1.7557
Os01g0552300	37.0316	35.3136	35.3474
Os01g0552500	2.18008	1.57354	2.33043
Os01g0552850	0.677058	1.39701	1.00377
Os01g0553200	7.96547	11.6123	8.39084
Os01g0553400	4.05533	2.57092	3.69658
Os01g0553600	12.827	7.76462	9.42266
Os01g0555100	0.522647	2.43295	0.0181372
Os01g0555200	3.8583	3.6625	2.32949
Os01g0555300	35.4628	26.7369	26.5429
Os01g0555600	13.8749	7.94083	11.7426
Os01g0556201	44.8941	80.0194	74.4278
Os01g0556400	28.3706	48.011	48.0638
Os01g0556650	7.2223	39.1377	14.293
Os01g0556700	3.68735	28.1771	8.23611
Os01g0557100	1.64929	1.82848	2.92536
Os01g0557400	1.58611	3.73056	5.13674
Os01g0557500	105.706	91.0761	98.1486
Os01g0557550	88.4903	87.2685	90.8403
Os01g0558100	0.860026	5.30392	2.26466
Os01g0558200	15.1297	13.0112	13.3783
Os01g0558300	23.064	34.2276	32.3496
Os01g0558500	8.12422	16.0612	18.9635
Os01g0558600	222.791	297.197	220.785
Os01g0558700	0.302334	1.99182	0.577029
Os01g0558800	5.82316	7.24334	7.839
Os01g0558825	49.6284	54.0536	59.1681
Os01g0559100	29.8556	24.8051	19.6554
Os01g0559150	5.31123	5.06332	5.13851
Os01g0559200	32.303	30.4497	28.1493
Os01g0559500	3.94769	3.36757	3.81839
Os01g0559600	67.7883	82.0935	55.8963
Os01g0559750	862.807	618.842	833.456
Os01g0559825	593.139	253.886	563.509
Os01g0560000	107.095	75.7636	86.4859
Os01g0560200	29.3509	29.5796	31.6124
Os01g0562600	0.902765	6.16676	5.11031
Os01g0563000	2.39368	5.36134	5.19194
Os01g0563500	13.9632	6.74986	11.414
Os01g0564400	3.37837	2.67181	3.72478
Os01g0565600	187.043	260.835	244.955
Os01g0565800	2.15522	0.884694	0.62762
Os01g0566000	10.0674	2.72267	4.06083
Os01g0566050	9.10513	23.493	15.1539
Os01g0566200	2.29818	0.712298	1.61057
Os01g0566500	1.15611	29.7485	7.00512
Os01g0566800	2.85605	4.0464	4.23595
Os01g0566900	98.8842	104.822	115.694
Os01g0567400	1.55721	5.92899	2.11258
Os01g0567500	0	10.833	4.12565
Os01g0567533	2.23913	46.97	11.6003
Os01g0570500	112.185	130	122.125
Os01g0570700	6.03509	15.8438	14.8465
Os01g0570800	1.74172	17.6395	5.73671
Os01g0571000	26.347	16.6039	16.1218
Os01g0571100	8.55829	4.19414	4.21993
Os01g0571200	50.0537	30.5112	38.5428
Os01g0571300	0.450071	3.33753	2.30818
Os01g0571700	6.74964	2.68639	2.65477
Os01g0571766	15.6881	9.50896	11.9381
Os01g0571800	2.49941	0.255367	1.42504
Os01g0572100	3.15714	6.65232	6.12523
Os01g0572300	57.7343	54.0472	62.0472
Os01g0572700	9.55067	5.84409	10.4404
Os01g0574400	12.8298	14.8636	15.2635
Os01g0574451	11.3497	12.9986	13.8453
Os01g0574500	20.9515	33.2415	33.9345
Os01g0574550	4.42972	6.52186	6.52567
Os01g0574600	21.0546	17.6568	15.787
Os01g0574800	24.1428	18.6636	28.1993
Os01g0575000	50.1569	61.8752	53.2469
Os01g0575200	2.04989	5.48434	1.376
Os01g0575500	26.6815	23.3926	20.4903
Os01g0577450	5.15979	1.96078	4.74958
Os01g0577600	58.1093	21.7393	51.2526
Os01g0578000	4.09598	4.10904	4.26755
Os01g0578500	3.75452	3.20333	5.81544
Os01g0578700	6.81265	4.54482	5.24942
Os01g0579000	160.998	0.381864	26.179
Os01g0579600	31.4696	27.1033	47.7153
Os01g0579800	25.352	26.444	29.1993
Os01g0579900	14.9102	4.22327	5.90047
Os01g0580000	9.45877	6.15834	7.29401
Os01g0580100	4.62494	1.38965	3.32813
Os01g0580200	8.75786	5.75776	7.70596
Os01g0580300	2.89454	2.90183	4.57476
Os01g0580500	35.5472	5.88404	4.01486
Os01g0580800	8.70702	16.4349	11.9049
Os01g0581300	19.0312	32.8197	29.0494
Os01g0581900	1.8976	1.93871	1.96198
Os01g0582400	17.1651	27.7475	25.0364
Os01g0582600	6.96122	76.7629	33.4343
Os01g0583100	78.9973	225.644	116.142
Os01g0583200	5.587	5.79875	6.43937
Os01g0583300	1.00083	1.53419	1.05294
Os01g0583600	0.235818	2.24092	2.06839
Os01g0584032	0.560965	2.82723	1.5053
Os01g0584100	2.43007	12.2687	4.15368
Os01g0584200	14.9894	12.8525	12.8415
Os01g0584250	3.68571	2.59886	2.70594
Os01g0584300	62.3682	21.8834	33.0106
Os01g0584800	3.42775	9.6195	7.33728
Os01g0584900	0.0294472	15.3658	6.93369
Os01g0585100	18.6878	16.7843	13.8167
Os01g0585300	223.678	273.894	183.442
Os01g0585400	2.27078	3.18418	3.62047
Os01g0585600	49.358	66.7407	47.204
Os01g0585650	9.83267	9.10296	8.49514
Os01g0585700	26.1089	27.3186	23.6251
Os01g0586600	13.1136	10.147	11.6476
Os01g0587000	61.8063	37.126	30.2987
Os01g0587300	9.5771	6.36698	3.85239
Os01g0587500	16.9784	5.05639	6.89907
Os01g0588000	17.2156	1.89081	3.46246
Os01g0588200	30.058	24.1003	23.4494
Os01g0588300	6.95827	6.28735	5.10666
Os01g0588400	0.795205	14.8441	34.3928
Os01g0588500	16.3273	15.9979	25.9752
Os01g0588550	19.3108	19.2631	31.321
Os01g0588600	0.524015	1.90247	1.70389
Os01g0588700	19.9134	35.0142	31.664
Os01g0588800	7.49337	8.62631	7.46666
Os01g0588900	13.6394	28.2371	18.8897
Os01g0589000	11.0093	9.09717	11.244
Os01g0589100	42.9319	51.4782	42.5652
Os01g0589400	0.967418	1.05102	1.45216
Os01g0589500	69.4059	105.568	104.585
Os01g0589700	44.7963	51.5043	38.2057
Os01g0589900	0.581953	1.18368	1.28098
Os01g0590200	13.1356	14.1482	14.7973
Os01g0590300	0.873289	1.75308	1.41042
Os01g0590700	7.40854	3.42247	5.70399
Os01g0590900	13.0106	11.5455	10.373
Os01g0591000	12.789	13.4259	5.26147
Os01g0591250	2.30717	2.31005	1.04688
Os01g0592500	0.207881	7.00525	0.90356
Os01g0592900	2.4218	3.1136	3.37669
Os01g0593000	7.72983	5.88761	7.35832
Os01g0593200	30.4734	43.0639	41.5549
Os01g0593500	12.52	14.095	20.9248
Os01g0593600	25.2466	26.192	26.5615
Os01g0594300	2.04184	9.49323	2.58698
Os01g0594500	7.47799	383.264	180.946
Os01g0594900	0.355845	223.333	101.566
Os01g0595001	0.45659	7.36341	1.95606
Os01g0595100	22.6047	11.774	16.84
Os01g0595201	11.8765	1.1513	2.31682
Os01g0595400	73.5597	135.156	141.731
Os01g0596201	3.09251	2.34918	3.5891
Os01g0596425	1.48145	2.07748	3.92538
Os01g0597800	0.375156	5.86719	3.6515
Os01g0598400	1.35207	0.903948	1.84148
Os01g0598600	90.8892	36.2253	57.0237
Os01g0600000	269.85	243.221	265.311
Os01g0600200	24.9325	21.019	21.8583
Os01g0600300	19.1444	13.7024	15.6869
Os01g0600400	2.30725	1.60207	2.11865
Os01g0600500	10.7349	12.3548	8.37545
Os01g0600900	9596.09	3593.64	2993.26
Os01g0601200	7.3448	1.76434	4.6872
Os01g0602400	0	1.43386	1.59381
Os01g0602433	0.500013	9.30557	8.36026
Os01g0602800	32.2044	11.329	18.613
Os01g0603000	37.0967	45.7765	46.3829
Os01g0603200	0.974677	3.36633	1.53332
Os01g0603300	22.3942	144.286	56.044
Os01g0603800	0.954651	1.11571	1.5797
Os01g0604100	3.2919	0.800977	6.05662
Os01g0604500	12.7531	17.2766	11.8659
Os01g0604600	2.51042	0.252209	3.2168
Os01g0604700	19.6411	19.026	19.8985
Os01g0605000	7.34454	7.19819	4.97449
Os01g0605100	7.18158	25.9994	18.0385
Os01g0605650	8.67121	9.79052	10.0461
Os01g0605700	1.67245	13.9958	6.19342
Os01g0606000	0.655274	15.7526	2.23569
Os01g0606050	9.11194	6.17942	9.10797
Os01g0606166	6.62416	24.6287	10.3106
Os01g0606200	0.291336	2.01701	1.26924
Os01g0606900	64.6465	16.316	36.8459
Os01g0607000	4.92332	5.89267	2.64687
Os01g0607100	7.47314	4.2488	9.30368
Os01g0607200	12.4651	3.37134	3.02338
Os01g0607250	2.09567	2.17383	1.28733
Os01g0607300	2.07135	1.08484	1.49238
Os01g0607400	34.5551	51.6327	42.0814
Os01g0607800	0.686183	2.25051	1.78067
Os01g0607900	174.123	24.9549	75.9998
Os01g0609300	6.85137	132.551	34.9856
Os01g0609501	1.8318	40.6677	9.25444
Os01g0609900	1.25387	7.85564	2.93199
Os01g0610100	77.8264	76.6068	75.2186
Os01g0610300	37.5559	37.7762	39.3177
Os01g0610500	65.6792	66.5129	65.2847
Os01g0610600	6.83455	9.02178	8.68359
Os01g0610700	11.1445	13.7946	13.0839
Os01g0610800	18.1641	20.917	20.0517
Os01g0611000	119.088	1020.39	294.027
Os01g0611050	0.672182	2.06959	2.97447
Os01g0611100	42.8268	105.999	89.6007
Os01g0611900	1.94372	0.854506	1.53114
Os01g0611950	1.53321	1.282	2.67834
Os01g0612000	8.8672	8.22329	6.57513
Os01g0612200	99.6611	70.3645	71.8769
Os01g0612500	3.95227	11.8424	3.93207
Os01g0612600	12.5018	10.7342	12.1928
Os01g0612700	4.92528	2.89935	4.5544
Os01g0612800	28.1883	31.1435	32.8026
Os01g0612900	7.47909	10.6542	8.75537
Os01g0613100	1.00961	2.08714	1.84852
Os01g0613300	36.6817	26.126	28.6282
Os01g0613900	8.81951	6.86583	7.66217
Os01g0614300	47.2068	0.811304	6.17553
Os01g0614400	47.1334	40.7566	51.349
Os01g0614700	20.1996	21.8119	22.3543
Os01g0614750	6.95473	12.2165	9.35196
Os01g0615000	6.53204	0	5.46327
Os01g0615100	0	2.92311	0.45277
Os01g0615200	22.6882	15.5258	18.813
Os01g0615250	152.483	109.545	128.154
Os01g0615300	24.5985	20.5841	18.1592
Os01g0615400	108.137	84.0896	85.1345
Os01g0615500	4.47593	1.06098	1.69805
Os01g0616100	23.7113	27.2931	30.8719
Os01g0616300	19.1147	4.66369	10.4171
Os01g0616366	30.1192	7.58213	15.2123
Os01g0616400	17.9292	16.4038	19.6711
Os01g0616500	21.6932	17.8664	20.9017
Os01g0616600	12.9374	13.5101	21.7683
Os01g0616800	17.5991	26.3644	22.8658
Os01g0616900	16.3507	18.6214	15.4697
Os01g0617500	26.8431	34.8299	33.1083
Os01g0617600	5.44725	6.97147	11.0067
Os01g0617700	13.5849	11.7494	14.4065
Os01g0617800	6.05335	16.8157	13.2332
Os01g0617900	25.7636	18.6321	23.1003
Os01g0618000	9.87259	20.2747	18.0543
Os01g0618100	103.195	47.8606	53.6249
Os01g0618200	11.5657	3.91692	6.94747
Os01g0618400	8.42488	10.5034	10.1789
Os01g0618500	6.75628	12.9639	11.3439
Os01g0618700	19.9621	8.44489	9.96968
Os01g0618800	26.3816	44.3017	34.4287
Os01g0618900	140.151	159.807	180.679
Os01g0619000	13.247	20.0858	18.297
Os01g0619800	3.3038	1.54099	4.12861
Os01g0619900	1.09124	2.53964	1.72602
Os01g0620100	19.1304	14.6142	20.5879
Os01g0620800	15.203	3.10033	7.94574
Os01g0620900	11.3126	1.21	5.96764
Os01g0621200	21.5718	3.70356	8.87277
Os01g0621300	37.6129	23.5356	27.6861
Os01g0621400	11.8165	6.98313	7.8754
Os01g0621600	9.53663	5.06647	6.86099
Os01g0621700	27.9869	23.9977	22.599
Os01g0621900	69.3433	112.973	64.3074
Os01g0622066	11.5591	4.12628	5.44524
Os01g0622100	41.9815	16.8451	23.3561
Os01g0622300	28.9729	13.6957	12.4044
Os01g0622400	19.0568	4.7901	9.12998
Os01g0622500	73.299	24.2278	30.2001
Os01g0622700	95.3396	142.085	155.78
Os01g0622800	3.60141	0	3.21006
Os01g0622901	21.7658	0.144517	19.7614
Os01g0623200	6.40699	8.64113	12.4534
Os01g0623500	1.39636	12.0933	3.24959
Os01g0623550	1.05059	7.9566	2.221
Os01g0623900	2.8771	2.85773	4.54464
Os01g0624000	36.6886	40.0281	37.8727
Os01g0624500	52.5902	60.8302	65.4797
Os01g0625200	32.415	18.2991	21.8475
Os01g0625900	3.97677	7.74289	4.49334
Os01g0626100	20.3466	14.2698	15.8488
Os01g0626300	116.953	96.1136	109.111
Os01g0626400	1.88245	6.23011	2.31335
Os01g0626500	6.07641	3.8477	4.38233
Os01g0626900	14.0041	25.0257	21.1371
Os01g0627400	3.49167	2.77489	2.75272
Os01g0627450	5.03347	4.97842	4.31654
Os01g0627500	2.18042	3.91752	3.77759
Os01g0627550	3.38022	6.27668	5.8993
Os01g0627800	1.40326	2.63717	2.65159
Os01g0627916	0.15961	12.3187	5.98101
Os01g0628700	7.22376	5.43011	8.10884
Os01g0629400	14.1225	19.3096	15.6746
Os01g0629600	0.202416	4.67127	5.26328
Os01g0629750	37.8118	43.9271	41.0452
Os01g0629900	25.5927	56.9564	57.025
Os01g0630000	7.81848	13.7329	14.5978
Os01g0630101	1.47917	0.73433	1.73493
Os01g0630300	58.3708	12.861	17.8473
Os01g0631100	44.4065	26.0018	31.8757
Os01g0631200	4.42268	11.487	5.6077
Os01g0631400	35.2372	11.6349	25.3858
Os01g0631500	23.4105	5.69005	6.5656
Os01g0631700	56.0694	3.94407	12.4271
Os01g0631800	0.206563	2.64202	0.230379
Os01g0631900	5.94938	1.29759	0.968635
Os01g0632000	1.85726	0.38248	1.14306
Os01g0632700	35.5949	21.8061	27.0625
Os01g0633000	146.606	154.826	101.779
Os01g0633100	4.56044	1.62514	1.93224
Os01g0633200	31.0869	16.8038	36.4502
Os01g0633900	14.6496	6.0722	8.53669
Os01g0634500	7.36061	2.37143	4.72474
Os01g0634900	2.23684	0.153416	0.17268
Os01g0635200	6.42955	0.581442	0.600175
Os01g0635400	11.9628	14.3277	22.8703
Os01g0636400	104.337	35.9302	31.3572
Os01g0636500	8.72547	0.560052	2.03994
Os01g0636600	18.4814	14.9065	11.2913
Os01g0636700	6.21277	9.36448	5.86392
Os01g0637800	1.41757	5.16007	2.81281
Os01g0638000	0.913373	2.5548	4.61054
Os01g0638600	1.27003	2.51219	4.31788
Os01g0639100	40.0904	35.3948	33.8671
Os01g0639200	46.7252	61.708	66.6938
Os01g0639600	2.07292	20.7002	11.3647
Os01g0639900	56.7229	349.43	164.318
Os01g0640700	15.9228	21.5419	21.6719
Os01g0640800	4.57529	5.57668	6.05169
Os01g0641000	14.4843	20.3254	18.7436
Os01g0641100	6.61524	4.41894	5.17975
Os01g0641700	10.675	6.83488	6.54503
Os01g0641800	2.17355	1.59951	1.63884
Os01g0642000	4.30083	6.05936	5.27943
Os01g0642200	806.942	2151.45	1460.41
Os01g0642600	5.59468	0.761608	6.03995
Os01g0642900	20.8221	29.2967	41.8208
Os01g0643300	15.3726	2.81023	5.12997
Os01g0643450	29.0301	3.93314	10.6542
Os01g0643800	4.30288	4.08334	4.02853
Os01g0643825	3.76931	12.4548	4.51578
Os01g0644000	16.279	34.5771	21.8582
Os01g0644200	0.667101	5.94487	5.13643
Os01g0644400	22.846	33.1307	38.9961
Os01g0644500	1.09976	1.7257	2.2357
Os01g0644600	103.791	141.037	50.3703
Os01g0644900	0.687415	6.79256	5.1763
Os01g0645000	79.2171	33.0044	34.7617
Os01g0645200	149.27	60.9069	54.6819
Os01g0645400	0.933047	0.587745	1.62996
Os01g0645900	0.916131	5.51497	7.35774
Os01g0646300	26.8402	31.4825	34.3129
Os01g0646700	10.167	9.01687	9.73747
Os01g0647000	51.6895	51.9103	50.7912
Os01g0647100	28.4222	51.6913	32.5796
Os01g0647150	0.772655	1.50663	1.04984
Os01g0647700	16.9025	7.03745	6.89817
Os01g0647800	1.37356	1.69814	2.03292
Os01g0647850	3.74832	5.91519	6.56385
Os01g0648225	1.12945	3.30977	1.01389
Os01g0648500	1.49218	4.35173	3.08009
Os01g0648700	4.10599	1.96045	6.03023
Os01g0649000	4.42636	6.54621	5.78289
Os01g0649100	216.553	175.732	191.167
Os01g0649200	3.67917	19.9343	10.5228
Os01g0649900	2.64589	5.18174	2.41443
Os01g0650000	8.29442	9.214	9.28719
Os01g0650200	0.551327	1.53475	0.71242
Os01g0650700	9.35344	9.9825	7.91586
Os01g0651100	1.5844	1.76789	3.32342
Os01g0651150	10.1234	0.986068	1.94281
Os01g0651350	4.95322	3.96531	2.70516
Os01g0651450	0.214862	3.30857	0.554881
Os01g0651800	4.06764	3.20837	2.33747
Os01g0651866	14.0417	11.6661	8.78743
Os01g0651932	138.044	18.2324	69.2607
Os01g0652100	29.8851	6.94145	12.6831
Os01g0652200	13.0122	2.8344	3.33203
Os01g0652300	2.6951	2.73601	2.19825
Os01g0652375	7.13827	4.65841	3.67812
Os01g0652450	5.02764	14.2691	6.07357
Os01g0652600	64.4818	33.3991	67.6831
Os01g0652800	111.91	47.1988	68.6792
Os01g0653700	10.7002	13.0129	19.5629
Os01g0653800	57.4843	19.4204	25.6628
Os01g0654100	59.4536	30.3936	14.931
Os01g0654200	6.90854	8.68868	7.68652
Os01g0654300	14.3725	24.4922	99.8967
Os01g0654400	162.694	61.0739	89.3657
Os01g0655250	45.2091	58.1986	40.3257
Os01g0655400	12.4381	14.1893	13.8763
Os01g0655500	7.90098	9.68764	9.18889
Os01g0655800	28.1911	28.4683	25.4397
Os01g0656200	13.6492	18.361	14.9091
Os01g0656250	9.95787	12.8967	11.1433
Os01g0656400	0.918932	5.52684	2.08937
Os01g0656600	4.85009	2.34191	2.04219
Os01g0656900	3.86633	3.69494	6.36763
Os01g0657801	1.03595	0.247956	1.65797
Os01g0658400	196.597	193.344	126.378
Os01g0658500	27.9173	48.158	43.4339
Os01g0658700	23.6796	5.79664	14.061
Os01g0658900	12.9488	45.6101	29.6489
Os01g0659200	194.288	147.865	124.627
Os01g0659800	5.56237	4.28158	8.9982
Os01g0659900	2.23093	0.837154	0.981743
Os01g0660200	0.4338	14.4408	110.021
Os01g0660300	40.3301	10.2558	11.7806
Os01g0660550	3.56397	2.49316	2.81187
Os01g0660700	2.05569	1.05695	3.14905
Os01g0660800	23.9956	16.9629	30.3373
Os01g0660900	10.0945	26.5475	19.9806
Os01g0661000	41.4908	30.8615	43.9628
Os01g0661200	75.5872	65.9462	75.4578
Os01g0661400	15.3311	83.4214	39.5978
Os01g0661601	20.0605	110.141	47.1662
Os01g0661650	32.2668	6.79295	13.5914
Os01g0662300	73.458	109.336	66.746
Os01g0662600	189.11	261.569	271.094
Os01g0662700	30.2512	30.8319	22.8407
Os01g0663051	6.28186	1.34309	1.07934
Os01g0663300	400.365	117.526	171.059
Os01g0663400	9.50749	5.19417	6.92025
Os01g0663500	2.93259	7.66023	4.74128
Os01g0663800	29.8954	55.5131	48.8296
Os01g0664000	4.82464	4.23983	3.69022
Os01g0664100	5.16672	15.6834	9.57777
Os01g0664200	23.0541	29.3814	23.5634
Os01g0664500	55.8746	50.1836	49.6323
Os01g0665200	38.9178	28.7731	35.6824
Os01g0665250	7.20017	3.62764	5.81247
Os01g0665300	7.33134	23.2604	16.0147
Os01g0665400	6.36971	7.23529	5.91319
Os01g0665500	9.36149	29.4493	15.3564
Os01g0665900	5.392	21.4125	21.567
Os01g0666000	0.193729	4.33629	1.11538
Os01g0666200	6.14401	9.44425	14.713
Os01g0666400	17.2455	18.7058	20.1077
Os01g0666600	7.70138	20.2497	9.98287
Os01g0666800	65.9475	85.5524	96.1356
Os01g0667100	13.6856	14.0798	13.9903
Os01g0667200	22.1829	26.7617	28.7449
Os01g0667550	24.6373	55.0493	32.5996
Os01g0667600	9.85211	26.4957	16.5682
Os01g0667900	4.29347	118.485	26.4823
Os01g0668000	35.9238	41.7132	44.3675
Os01g0668100	360.686	77.3045	130.612
Os01g0668200	9.40022	8.52469	8.50752
Os01g0668400	2.50369	1.98066	1.9493
Os01g0668700	1.55377	2.31009	2.19842
Os01g0668901	0.97545	1.39341	1.5311
Os01g0670500	1.59843	11.9017	7.17937
Os01g0670800	26.5134	12.3333	13.3499
Os01g0672100	16.4175	37.9846	33.8727
Os01g0672201	15.8627	12.4204	11.6941
Os01g0672400	24.7798	40.2024	27.2738
Os01g0672500	12.1513	8.92454	7.92297
Os01g0672700	9.92251	11.7401	10.6682
Os01g0672800	4.79281	13.9716	8.85341
Os01g0673300	11.0231	11.6245	16.6286
Os01g0673500	14.4042	9.39347	10.2282
Os01g0673600	222.46	198.007	210.168
Os01g0673700	8.1845	10.3997	7.65647
Os01g0673800	39.7599	26.431	26.8955
Os01g0674000	27.8826	44.3639	33.1928
Os01g0674100	19.4409	21.3055	19.5842
Os01g0674125	9.03345	11.5599	11.7062
Os01g0674150	3.43519	1.78282	1.6916
Os01g0674400	0.814016	17.2461	12.8017
Os01g0674500	27.2419	58.7534	36.0321
Os01g0674700	5.63826	9.7488	8.90014
Os01g0674800	13.2512	32.1912	13.7221
Os01g0675100	427.686	541.519	571.036
Os01g0675400	2.19457	0.0492214	1.63378
Os01g0675500	23.772	72.1269	42.5985
Os01g0675700	80.8635	56.2594	55.4055
Os01g0675800	3.93288	4.44755	4.97265
Os01g0676200	11.0001	19.0272	14.0854
Os01g0678500	12.0888	4.64605	4.25975
Os01g0678600	63.5782	117.69	73.628
Os01g0678700	12.8952	3.0473	7.40984
Os01g0679000	4.56172	5.00297	5.92393
Os01g0679600	11.1652	15.2163	16.7783
Os01g0679700	386.588	430.8	524.144
Os01g0679900	11.2401	15.2816	11.1029
Os01g0680000	2.23314	3.56598	2.58992
Os01g0680200	2.29217	4.3666	5.07277
Os01g0680400	24.3056	25.6906	34.5509
Os01g0680600	11.495	11.5953	13.3816
Os01g0680700	49.7957	46.2137	41.652
Os01g0680900	20.0203	3.75575	7.32963
Os01g0680950	19.7885	4.89307	10.0332
Os01g0681000	0.892285	1.26639	2.15316
Os01g0681200	14.5279	6.42406	5.08693
Os01g0681332	3.97902	1.06514	1.13303
Os01g0681400	3.18775	2.65075	1.9539
Os01g0681600	28.7628	38.1022	39.6496
Os01g0681650	17.0441	23.0732	24.4768
Os01g0681700	0.267812	2.15737	1.69697
Os01g0682001	21.3373	66.3532	32.9835
Os01g0682200	2.55171	2.30835	3.35091
Os01g0682500	7.28886	9.28271	7.59465
Os01g0683100	29.7375	24.1094	29.6298
Os01g0683400	6.09265	7.41291	8.31362
Os01g0683550	4.05219	0.251362	0.789995
Os01g0683600	11.943	4.61258	5.0137
Os01g0683800	2.90905	7.68281	5.09901
Os01g0684200	7.95521	2.37257	3.59847
Os01g0684800	1.8254	0.245948	0.666875
Os01g0684900	4.19548	19.1216	15.8479
Os01g0685100	4.56368	5.57524	7.71592
Os01g0685200	1.81856	0.610807	1.07566
Os01g0685300	1.69122	1.63515	3.32565
Os01g0685400	9.49268	11.9204	12.0444
Os01g0685500	5.60422	5.87277	6.28783
Os01g0685600	1.98308	1.57107	2.5885
Os01g0685800	176.244	133.653	142.219
Os01g0685850	44.1848	28.6596	35.0646
Os01g0685900	4.23105	0.705	1.17913
Os01g0686000	31.5537	17.2669	22.1995
Os01g0686100	6.73036	9.71944	7.93979
Os01g0686300	2.43223	1.59083	1.83197
Os01g0686400	30.4664	12.7572	18.7027
Os01g0686500	2.23849	1.53925	1.87615
Os01g0686650	1.86958	0.269897	1.4457
Os01g0686800	263.569	221.25	274.655
Os01g0687150	0.195378	4.95686	3.36852
Os01g0687300	6.50208	7.19002	5.37386
Os01g0687400	0.664259	19.1831	3.78312
Os01g0687500	6.09233	6.63536	6.92833
Os01g0687600	7.65844	14.5638	15.9323
Os01g0687700	19.0193	12.8914	12.6059
Os01g0687850	9.11719	9.63309	7.9105
Os01g0688000	0.789509	3.99665	1.94794
Os01g0688200	4.51202	4.47573	3.26961
Os01g0688300	0.492696	1.64692	1.49912
Os01g0688600	12.3357	19.9352	15.0796
Os01g0689000	8.29361	2.3892	4.70881
Os01g0689451	7.66076	9.87008	8.53222
Os01g0689600	4.30378	3.09447	2.64508
Os01g0689800	20.3704	23.4407	22.8209
Os01g0689900	42.5634	81.6422	72.5902
Os01g0689975	40.9604	74.4531	81.303
Os01g0691200	3.55781	0.273817	1.66461
Os01g0691300	789.643	2.9569	357.658
Os01g0691400	5.84943	0.337446	1.75235
Os01g0691500	5.40896	3.76601	3.2308
Os01g0691600	15.9087	20.8565	18.8311
Os01g0691700	44.0248	34.073	32.0705
Os01g0692000	3.74104	3.26481	3.15383
Os01g0692100	2.40276	2.88929	10.01
Os01g0692200	9.82132	8.3851	7.46479
Os01g0692500	103.791	200.313	130.496
Os01g0692600	3.35397	3.26634	3.83284
Os01g0693300	0.288791	2.51884	0.636467
Os01g0693400	52.4726	428.449	137.024
Os01g0693800	18.6547	32.4992	26.4943
Os01g0693900	4.82894	9.26231	6.76117
Os01g0694000	0.212685	5.66218	0.639968
Os01g0694100	1.07498	4.16632	1.32144
Os01g0694200	7.65739	7.26943	8.63966
Os01g0694300	32.5491	42.8779	30.9639
Os01g0694500	0.540501	5.02288	2.8761
Os01g0694800	2.29476	4.82932	4.03493
Os01g0694900	30.8648	15.0307	15.5253
Os01g0695100	42.1837	18.9557	23.1433
Os01g0695200	5.26758	14.3796	9.03286
Os01g0695300	3.03591	5.39005	4.12514
Os01g0695625	1.45799	1.40125	1.22934
Os01g0695700	1.97282	3.25586	2.692
Os01g0695800	0.0443736	3.29938	2.5809
Os01g0696000	2.48041	1.39929	2.20587
Os01g0696500	24.4748	6.44526	7.38346
Os01g0696701	2.92308	3.14859	4.41263
Os01g0697100	63.7726	27.6045	44.7978
Os01g0698000	73.8513	104.639	110.072
Os01g0698100	16.2303	18.0807	13.5007
Os01g0698300	6.74512	8.32894	6.94926
Os01g0699100	1.16041	8.32034	2.00595
Os01g0699400	4.8489	40.8259	6.13839
Os01g0699500	2.64222	40.3823	5.70845
Os01g0699600	0	3.53563	0.88834
Os01g0699900	38.8028	8.52227	7.97217
Os01g0700000	35.5206	70.647	48.1422
Os01g0700100	3.56581	21.07	9.7344
Os01g0701100	0.0471929	1.71219	0.642232
Os01g0701700	3.09237	4.12745	3.04772
Os01g0701900	10.9069	11.3657	9.62429
Os01g0702300	4.19688	1.24582	2.33067
Os01g0702400	5.64266	23.4779	32.6948
Os01g0702700	64.4812	41.6934	51.8468
Os01g0703000	1.24765	1.88468	1.82573
Os01g0703300	46.6827	6.69362	14.923
Os01g0703400	43.9101	28.8896	29.1537
Os01g0703600	13.7346	9.828	12.5631
Os01g0703800	18.1225	12.5714	17.2532
Os01g0704100	2.43844	3.94118	2.16206
Os01g0704200	4.38274	6.45013	6.24305
Os01g0704300	11.3868	17.9997	8.93128
Os01g0704400	18.0359	6.16617	10.3848
Os01g0704700	6.71759	5.00721	4.64928
Os01g0705000	5.11908	15.7235	13.6487
Os01g0705100	5.23466	4.81833	6.31114
Os01g0705200	5.78744	195.162	228.79
Os01g0705300	8.44036	15.4717	14.4518
Os01g0705500	59.8203	61.1044	53.3322
Os01g0705700	0.247346	6.41463	0.692388
Os01g0705750	3.25786	90.8975	10.1617
Os01g0706000	22.5953	24.9711	32.2253
Os01g0706100	2.31196	2.81456	3.06428
Os01g0706400	4.97483	14.6571	10.7445
Os01g0706500	21.3342	7.07678	10.6067
Os01g0706600	0.80182	6.90805	2.77036
Os01g0706700	7.86917	4.49296	2.57848
Os01g0706900	11.4694	7.67806	6.9004
Os01g0707300	104.445	221.809	163.997
Os01g0707500	1.04651	30.1881	4.06794
Os01g0708000	27.3072	23.3403	23.5946
Os01g0708100	9.69113	5.3548	6.04226
Os01g0708201	18.5635	13.0886	13.5531
Os01g0708300	12.2314	9.62665	10.6365
Os01g0708500	2.26058	22.2924	6.96352
Os01g0708600	47.0693	22.2225	25.053
Os01g0708700	2.97941	1.65378	1.13224
Os01g0708900	8.43539	15.4909	5.92153
Os01g0709000	5.46318	2.30414	2.69141
Os01g0709100	3.13014	1.35163	1.80508
Os01g0709400	8.75666	8.21167	7.00975
Os01g0709500	163.115	59.7618	60.6757
Os01g0710000	82.2122	32.7655	52.8166
Os01g0710100	3.27429	1.00472	2.2619
Os01g0710200	24.2404	5.03897	6.14518
Os01g0710300	2.01669	1.99412	2.69281
Os01g0710700	70.2166	84.9538	40.7679
Os01g0710800	22.2261	12.5541	15.8808
Os01g0711000	18.4048	12.053	11.894
Os01g0711050	4.92114	3.76662	3.02911
Os01g0711100	24.6169	25.0652	25.4653
Os01g0711400	155	161.176	111.055
Os01g0711500	24.6478	39.5192	19.8899
Os01g0712501	1.84913	1.72473	1.2223
Os01g0712600	13.911	10.9435	8.44965
Os01g0712700	142.751	183.116	169.381
Os01g0712800	4.08388	0.200102	1.83376
Os01g0713200	0.476886	5.67469	5.61093
Os01g0713900	17.2006	17.7593	11.5236
Os01g0714100	8.13509	5.58486	7.07533
Os01g0714600	0.0898086	6.9565	3.72871
Os01g0714900	33.2129	11.4594	14.5705
Os01g0715000	6.17243	7.9323	7.89293
Os01g0715400	6.55818	5.34055	4.81103
Os01g0715500	18.9936	5.54312	14.9358
Os01g0715600	2.19045	0.215181	0.50885
Os01g0715700	1.59676	1.2506	1.35191
Os01g0715800	17.4487	22.1864	24.6079
Os01g0716200	23.3538	4.3508	9.34057
Os01g0716400	6.28399	84.0248	12.4551
Os01g0716450	0.0838656	1.38054	0.18581
Os01g0716800	6.97991	10.0097	4.83652
Os01g0717000	40.7213	82.1196	44.4925
Os01g0717400	1.89839	3.52897	3.01668
Os01g0717501	0.809704	1.48076	1.04105
Os01g0717650	1.88436	2.29481	2.78356
Os01g0717700	105.331	56.6183	43.4741
Os01g0718000	6.63711	4.87288	4.68759
Os01g0718300	38.2471	25.0128	33.621
Os01g0718500	7.35622	1.0899	2.00965
Os01g0718900	10.1336	12.0929	15.3161
Os01g0719000	6.35222	10.8149	13.5077
Os01g0719100	14.0076	84.5511	52.7907
Os01g0719150	0.19862	1.75568	1.11575
Os01g0719200	1.41166	1.56951	1.32311
Os01g0719300	1.05103	13.3485	2.09627
Os01g0719350	0.255582	3.06989	0.546706
Os01g0719400	1.19511	0.611619	1.22912
Os01g0719600	2.94979	1.31614	1.22387
Os01g0719700	17.9056	26.9468	19.8199
Os01g0720300	129.553	75.8308	92.9208
Os01g0720400	64.2487	105.77	31.2154
Os01g0720500	1246.22	651.596	264.935
Os01g0720600	7.95213	3.97848	5.61723
Os01g0720700	8.96149	25.9755	13.976
Os01g0720900	1.87983	2.1865	1.62621
Os01g0721000	8.85168	21.087	18.1718
Os01g0721700	13.4583	6.77488	8.11814
Os01g0721900	120.671	175.65	200.345
Os01g0722100	3.43047	2.34938	3.25445
Os01g0722800	35.3844	32.4343	45.4199
Os01g0723025	14.144	3.74871	6.52504
Os01g0723100	9.92551	9.71739	7.5085
Os01g0723200	101.638	81.7101	112.584
Os01g0723400	59.6196	159.729	111.145
Os01g0723600	5.05277	8.40469	5.86433
Os01g0723800	2.33661	2.58811	1.48067
Os01g0725000	5.49638	21.805	8.51171
Os01g0725400	9.01834	13.1748	9.9925
Os01g0725800	14.9762	30.1295	23.6226
Os01g0726001	14.5591	19.4016	19.6291
Os01g0726400	18.0461	12.069	16.3251
Os01g0726700	154.95	190.527	165.453
Os01g0727100	18.186	8.78785	8.50802
Os01g0727200	1.605	2.42784	2.15713
Os01g0727400	4.84394	3.02338	3.92353
Os01g0727500	1.21135	6.25873	2.32977
Os01g0727800	2.52703	3.81404	4.23438
Os01g0727820	4.86214	8.65404	9.67
Os01g0727840	1.96855	2.71368	3.14976
Os01g0727900	6.19802	3.95345	10.7026
Os01g0728100	120.063	4.32279	28.3959
Os01g0728150	12.0655	2.95696	3.14274
Os01g0728200	2.65527	0.665278	1.81749
Os01g0728400	109.77	105.301	109.345
Os01g0728700	0.128179	3.25309	13.6253
Os01g0728900	13.99	25.7315	15.3552
Os01g0729200	2.38148	1.08242	1.3265
Os01g0729400	27.3243	4.14916	11.3668
Os01g0729500	38.1416	18.1545	17.6452
Os01g0729900	14.993	41.0107	18.9921
Os01g0729950	1.20044	2.75011	1.40699
Os01g0730100	0.715889	3.50954	1.85134
Os01g0730200	1.13582	6.01359	4.07909
Os01g0730300	23.1745	43.0545	26.7047
Os01g0730500	2.06571	0.302324	0.462481
Os01g0730700	0.479573	4.57125	2.26529
Os01g0730800	22.227	26.4802	25.0687
Os01g0730900	14.1548	10.1351	10.6264
Os01g0731000	21.3249	22.2937	18.2467
Os01g0731100	7.86817	89.2394	26.2292
Os01g0731150	7.99721	113.146	27.8245
Os01g0731201	0.158058	1.61068	0.232269
Os01g0731700	0.438818	6.33229	1.69216
Os01g0731800	4.41442	12.2772	7.26679
Os01g0732000	53.9509	34.1128	29.199
[truncated: 20,954 more rows]
