# Supplementary material for: Identification of candidate genes controlling chilling tolerance of rice in the cold region at the booting stage by BSA-Seq and RNA-Seq
Source: R Soc Open Sci. 2020 Nov 18;7(11):201081. doi: 10.1098/rsos.201081 (PMC7735347; doi:10.1098/rsos.201081)
Supplement: Table S11 [file rsos201081supp11.xls]

## Sheet: Sheet1
Table S11 Chilling stress associated DEGs in the candidate regions
#ID	11_0_4_FDR	11_0_4_log2FC	11_0_4_regulated	11_0_2_FDR	11_0_2_log2FC	11_0_2_regulated	25_0_2_FDR	25_0_2_log2FC	25_0_2_regulated	25_0_4_FDR	25_0_4_log2FC	25_0_4_regulated
Os06g0521400	--	--	--	--	--	--	--	--	--	--	--	--
Os06g0521500	--	--	--	--	--	--	--	--	--	--	--	--
Os06g0523300	0.0125598	-0.920216	normal	3.44277e-19	-4.68613	down	0.467976	-0.523941	normal	0.645515	0.804489	normal
Os06g0523400	0.0496763	0.742319	normal	0.0359132	0.828894	normal	0.806675	-0.144499	normal	0.980157	-0.0256128	normal
Os06g0524300	1.06121e-12	-1.81316	down	2.9756e-07	-1.29533	normal	0.00275364	-1.0064	normal	0.327571	-0.491561	normal
Os06g0524400	0.000258935	1.36839	normal	0.000107702	1.14196	normal	0.0761121	0.639669	normal	0.553965	0.342448	normal
Os06g0524500	0.317103	0.603868	normal	0.00758601	1.49701	normal	0.579471	0.460912	normal	0.583942	0.536687	normal
Os06g0524700	--	--	--	--	--	--	--	--	--	--	--	--
Os06g0524900	--	--	--	--	--	--	--	--	--	--	--	--
Os06g0525000	2.58893e-06	2.95439	up	4.45162e-06	2.81401	up	0.555449	-0.592394	normal	0.705814	0.404301	normal
Os06g0525200	5.03716e-06	-2.6646	down	3.80593e-14	-7.71679	down	--	--	--	--	--	--
Os06g0526100	--	--	--	--	--	--	--	--	--	--	--	--
Os06g0526600	0.622997	0.147548	normal	0.0498914	-0.606189	normal	0.681237	0.194065	normal	0.12403	0.769822	normal
Os06g0526700	0.950517	0.0282371	normal	0.334194	-0.477559	normal	0.332483	0.642411	normal	0.305675	0.798902	normal
Os06g0526800	1.02897e-07	1.49168	normal	1.23789e-06	1.42032	normal	0.11127	0.625693	normal	0.11035	1.06242	normal
Os06g0527100	0.402046	0.251773	normal	0.545478	0.189889	normal	0.000968953	1.09464	normal	0.560807	0.339834	normal
Os06g0527201	0.0277402	0.688686	normal	0.221034	-0.481649	normal	0.000829338	1.35083	normal	0.510966	0.454499	normal
Os06g0527500	0.606097	-0.231117	normal	0.636551	-0.227341	normal	0.648565	0.281328	normal	0.949715	0.0703664	normal
Os06g0528350	--	--	--	--	--	--	--	--	--	--	--	--
Os06g0528600	0.728179	-0.101556	normal	0.298048	-0.273606	normal	0.162226	0.507355	normal	0.319294	0.505457	normal
Os06g0528700	4.97555e-05	-2.08472	down	1.09795e-09	-3.89802	down	0.399515	1.19343	normal	0.919552	0.239736	normal
Os06g0529800	0.815877	-0.0795114	normal	0.26837	0.317653	normal	0.513175	-0.270556	normal	0.740767	-0.203412	normal
Os06g0529900	1.69947e-22	5.97453	up	3.58766e-24	6.35369	up	0.526197	-0.331049	normal	0.209182	-0.747146	normal
Os06g0530200	0.0441679	0.673069	normal	0.00929728	0.873196	normal	0.549909	-0.276629	normal	0.789706	-0.18103	normal
Os06g0530300	0.000190687	-1.00968	normal	2.42443e-06	-1.32722	normal	0.0530563	0.825356	normal	0.15978	0.782832	normal
Os06g0530400	--	--	--	--	--	--	--	--	--	--	--	--
Os09g0507100	7.61071e-23	4.81026	up	1.36514e-21	4.30059	up	2.07626e-24	-3.47631	down	0.000344101	-1.47298	normal
Os09g0507200	1.18877e-155	8.3384	up	2.65091e-128	8.29268	up	0.670942	0.229157	normal	0.781221	0.18234	normal
Os09g0507300	--	--	--	--	--	--	--	--	--	--	--	--
Os09g0507350	--	--	--	--	--	--	--	--	--	--	--	--
Os09g0507400	0.423209	0.386229	normal	0.131488	-0.860274	normal	0.0369867	1.24898	normal	0.386435	0.73278	normal
Os09g0507500	--	--	--	--	--	--	1.41267e-06	-3.82428	down	8.83734e-05	-2.6435	down
Os09g0507550	2.99247e-13	Inf	up	--	--	--	0.000345413	-3.62691	down	0.00765782	-2.32968	down
Os09g0507600	0.00547253	1.69697	up	9.48144e-07	2.97527	up	2.09782e-06	-3.13201	down	0.00992371	-1.77529	down
Os09g0507701	--	--	--	--	--	--	0.00402141	-2.68403	down	0.0712644	-1.57087	normal
Os09g0507800	0.769643	-0.153082	normal	0.796947	-0.135725	normal	0.748213	-0.138841	normal	0.487043	0.39835	normal
Os09g0508000	6.00371e-05	-2.63614	down	3.19909e-05	-2.91771	down	0.0591255	-1.98321	normal	0.474367	-0.732092	normal
Os09g0508200	0.00272349	-1.74229	down	0.0446982	-1.22024	normal	5.48557e-07	-5.20377	down	0.000373231	-2.89104	down
Os09g0508250	4.65854e-83	8.68251	up	5.5099e-55	8.08416	up	0.000860967	2.47384	up	0.148817	2.15582	normal
Os09g0508300	1.10895e-11	1.58892	up	1.92243e-11	1.59158	up	0.60011	0.198716	normal	0.971161	0.028401	normal
Os09g0508500	9.36329e-80	4.81244	up	1.09719e-81	4.91514	up	0.00175282	-1.01959	normal	0.616734	-0.297113	normal
Os09g0510900	0.0330126	-0.715359	normal	0.0599318	-0.659666	normal	0.0783362	-0.903709	normal	0.604389	0.345787	normal
Os09g0511000	0.170715	-0.406286	normal	0.00912853	-0.787015	normal	0.93093	-0.0530844	normal	0.952804	-0.0501233	normal
Os09g0511200	--	--	--	--	--	--	--	--	--	--	--	--
Os09g0511500	0.577364	-0.17984	normal	0.663225	0.134433	normal	0.992895	0.00356116	normal	0.678579	-0.246294	normal
Os09g0511600	9.59754e-06	-1.30835	normal	2.87232e-60	-8.48003	down	8.62454e-31	3.61655	up	0.149323	3.34717	normal
Os09g0511700	0.0170269	-0.615199	normal	8.89221e-34	-3.28112	down	1.73801e-05	1.35587	normal	0.239266	1.23733	normal
Os09g0512000	--	--	--	--	--	--	--	--	--	--	--	--
Os09g0512066	--	--	--	--	--	--	--	--	--	--	--	--
Os09g0512200	0.774588	0.12053	normal	0.250605	-0.52636	normal	0.62144	0.319912	normal	0.75433	0.282685	normal
Os09g0512700	0.00297698	-1.14383	normal	0.315649	-0.405444	normal	0.0192258	-1.08953	normal	0.353587	-0.56991	normal
Os09g0512800	0.555418	-0.241512	normal	0.942075	0.0289326	normal	0.773839	-0.168288	normal	0.789614	-0.202342	normal
Os09g0512900	0.707096	0.106782	normal	0.514806	0.181267	normal	0.155807	0.487652	normal	0.573873	0.311601	normal
Os09g0512950	0.0918307	0.742273	normal	0.370279	0.452334	normal	0.367382	-0.507842	normal	0.305675	-0.690473	normal
Os09g0513000	1.65886e-10	1.5048	normal	1.32534e-18	2.06071	up	0.270569	-0.410088	normal	0.999182	-0.00492687	normal
Os09g0513100	7.82508e-07	1.63382	up	0.0600452	0.776207	normal	0.00596222	1.16639	normal	0.139358	0.859558	normal
Os09g0513200	0.352307	-0.620566	normal	1.38629e-10	#NAME?	down	0.994817	0.0217649	normal	--	--	--
Os09g0513400	0.603046	-0.322581	normal	0.155017	-0.887995	normal	0.0199311	-2.04448	normal	0.831593	-0.259862	normal
Os09g0513500	6.25107e-08	-3.77409	down	1.99837e-08	-4.03689	down	--	--	--	--	--	--
Os09g0513600	4.81851e-09	1.36683	normal	2.7181e-18	2.02924	up	0.854395	0.0762831	normal	0.800075	0.16532	normal
Os09g0513700	7.40181e-07	1.39142	normal	1.21817e-14	2.05878	up	0.630222	-0.235871	normal	0.594657	0.315678	normal
Os09g0513800	0.0168036	-0.627105	normal	5.90266e-06	-1.222	normal	0.00809504	1.04747	normal	0.0283106	1.08533	normal
Os09g0514100	0.0300651	0.95347	normal	0.0921703	0.816971	normal	0.0121531	1.26389	normal	0.395403	0.648288	normal
Os09g0514200	9.78983e-10	3.19002	up	8.00931e-07	2.83711	up	0.626243	0.362342	normal	0.154126	1.03565	normal
Os09g0514300	0.00253176	1.20825	normal	0.0191384	1.04193	normal	0.099947	-0.821061	normal	0.375864	-0.571467	normal
Os09g0514350	0.0240762	1.34696	normal	0.0440285	1.22675	normal	0.191963	-1.06399	normal	0.405383	-0.769506	normal
Os09g0514400	1.42423e-08	-1.62969	down	0.000132708	-1.10001	normal	0.244911	-0.501218	normal	0.209026	-0.674776	normal
Os09g0514500	1.10205e-17	5.90544	up	1.67285e-26	6.98576	up	0.0912298	-1.02771	normal	0.73651	-0.296224	normal
Os09g0514550	5.70892e-08	3.66637	up	3.94336e-18	6.35853	up	0.0165866	-1.71573	normal	0.562852	-0.526538	normal
Os09g0514600	2.5517e-05	1.06756	normal	1.88585e-09	1.49565	normal	0.0906916	-0.585331	normal	0.489013	-0.367753	normal
Os09g0514700	0.585222	-0.221737	normal	0.42821	-0.329655	normal	0.0761555	0.966609	normal	0.404791	0.640052	normal
Os09g0514900	0.0404925	-0.656575	normal	0.95068	-0.0273887	normal	0.970969	0.0177502	normal	0.911797	-0.0892974	normal
Os09g0515100	0.000707204	0.813361	normal	1.08587e-05	1.03422	normal	0.554513	0.221696	normal	0.427703	0.42589	normal
Os09g0515200	0.47551	0.18898	normal	0.000501487	0.831594	normal	0.790088	-0.114999	normal	0.964137	-0.035036	normal
Os09g0515300	0.0348551	-1.2056	normal	0.000113408	-2.5304	down	0.808636	0.239178	normal	0.898705	-0.177467	normal
Os09g0515400	5.29733e-13	-2.64185	down	1.06262e-30	-5.76245	down	0.958262	0.0464166	normal	0.524039	-0.614804	normal
Os09g0515500	0.728362	0.107504	normal	0.0272301	-0.68645	normal	0.569397	-0.257848	normal	0.962094	0.039156	normal
Os09g0515550	0.000141662	2.28796	up	0.00385979	1.71701	up	0.000802163	2.69874	up	0.0158662	2.06612	normal
Os09g0515800	0.00184865	-0.853172	normal	0.582338	-0.164959	normal	0.126364	-0.566612	normal	0.272096	-0.55744	normal
Os09g0516200	0.0271203	-0.603139	normal	0.0134421	0.623712	normal	0.00063699	-1.44175	normal	0.280763	-0.553282	normal
Os09g0516300	0.0603585	-0.480488	normal	0.204149	-0.329505	normal	0.111665	0.5292	normal	0.444789	0.399405	normal
Os09g0516451	2.16643e-06	2.2002	up	0.0103912	1.41374	normal	0.23912	-0.715936	normal	0.658698	-0.3629	normal
Os09g0516500	1.53011e-05	1.525	normal	6.02075e-05	1.50924	normal	0.0286166	-0.898074	normal	0.251025	-0.574717	normal
Os09g0516600	1.10629e-05	-1.15484	normal	3.34315e-07	-1.35461	normal	0.00828288	0.821987	normal	0.167552	0.658811	normal
Os09g0516700	0.00359128	1.07525	normal	0.115553	0.674706	normal	0.398891	0.399489	normal	0.983576	0.0248901	normal
Os09g0516750	5.64557e-06	1.33935	normal	0.0397234	0.710989	normal	0.346726	0.411449	normal	0.985058	-0.0167748	normal
Os09g0517600	0.0518246	-0.831659	normal	0.000313023	1.21264	normal	0.0896694	-1.57543	normal	0.077287	-1.50613	normal
note: '--' indicates low expressive level of genes; 'Inf' indicates extreamly high expressive level; '#NAME?' indicates extreamly negative expressive
